# Supplementary material for: Exploring the bushmeat market in Brussels, Belgium: a clandestine luxury business
Source: Springer Nature journal article supplement (doi:10.1007/s10531-020-02074-7), 2020-11-10

## Exploring the bushmeat market in Brussels, Belgium: a clandestine luxury business

Sophie Gombeer\*, Casimir Nebesse, Prescott Musaba, Steve Ngoy, Marc Peeters, Ann Vanderheyden, Kenny Meganck, Nathalie Smits, Frank Geers, Sarah Van Den Heuvel, Thierry Backeljau, Marc De Meyer and Erik Verheyen

\* Corresponding author: Sophie Gombeer

Royal Belgian Institute of Natural Sciences

[sophie.gombeer@naturalsciences.be](mailto:sophie.gombeer@naturalsciences.be)

### ESM\_3: Neighbour-Joining trees

Figures S3: COI (NJ-trees 1-13) and cytb (NJ-trees 14-37) Neighbour-Joining trees constructed with Geneious Prime (genetic distance model: Tamurei-Nei). The numbers above the branches indicate the bootstrap support (500 replicates). Details on the methodology are specified in Online Resource 1. Details concerning the dataset and the bushmeat sample sequences are listed in Table ESM\_1a (Online Resource 1).

Figure S3 NJ-tree 1: COI\_Bovidae\_all  
Figure S3 NJ-tree 2: COI\_Bovidae\_long  
Figure S3 NJ-tree 3: COI\_Bovidae\_Bos\_all  
Figure S3 NJ-tree 4: COI\_Bovidae\_Bos\_long  
Figure S3 NJ-tree 5: COI\_Bovidae\_Cephalophinae\_all  
Figure S3 NJ-tree 6: COI\_Bovidae\_Cephalophinae\_long  
Figure S3 NJ-tree 7: COI\_Bovidae\_Trachelaphus\_all  
Figure S3 NJ-tree 8: COI\_Bovidae\_Trachelaphus\_long  
Figure S3 NJ-tree 9: COI\_Cercopithecidae\_all  
Figure S3 NJ-tree 10: COI\_Cercopithecidae\_long  
Figure S3 NJ-tree 11: COI\_Cercopithecidae\_Cercopithecus\_all  
Figure S3 NJ-tree 12: COI\_Suidae\_all  
Figure S3 NJ-tree 13: COI\_Thryonomyidae-Hystriidae\_all  
Figure S3 NJ-tree 14: cytb\_Bovidae\_all  
Figure S3 NJ-tree 15: cytb\_Bovidae\_long  
Figure S3 NJ-tree 16: cytb\_Bovidae\_trimmed\_A  
Figure S3 NJ-tree 17: cytb\_Bovidae\_trimmed\_B  
Figure S3 NJ-tree 18: cytb\_Bovidae\_Bos\_all  
Figure S3 NJ-tree 19: cytb\_Bovidae\_Cephalophinae\_all  
Figure S3 NJ-tree 20: cytb\_Bovidae\_Cephalophinae\_long  
Figure S3 NJ-tree 21: cytb\_Bovidae\_Cephalophinae\_trimmed\_A

Figure S3 NJ-tree 22: cytb\_Bovidae\_Cephalophinae\_trimmed\_B  
Figure S3 NJ-tree 23: cytb\_Bovidae\_Trachelaphus\_all  
Figure S3 NJ-tree 24: cytb\_Bovidae\_Trachelaphus\_long  
Figure S3 NJ-tree 25: cytb\_Bovidae\_Trachelaphus\_trimmed  
Figure S3 NJ-tree 26: cytb\_Cercopithecidae\_all  
Figure S3 NJ-tree 27: cytb\_Cercopithecidae\_long  
Figure S3 NJ-tree 28: cytb\_Cercopithecidae\_trimmed\_A  
Figure S3 NJ-tree 29: cytb\_Cercopithecidae\_trimmed\_B  
Figure S3 NJ-tree 30: cytb\_Cercopithecidae\_Cercopithecus\_all  
Figure S3 NJ-tree 31: cytb\_Cercopithecidae\_Cercopithecus\_long  
Figure S3 NJ-tree 32: cytb\_Cercopithecidae\_Cercopithecus\_trimmed  
Figure S3 NJ-tree 33: cytb\_Suidae\_all  
Figure S3 NJ-tree 34: cytb\_Suidae\_long  
Figure S3 NJ-tree 35: cytb\_Suidae\_trimmed  
Figure S3 NJ-tree 36: cytb\_Thryonomyidae-Hystriidae\_all  
Figure S3 NJ-tree 37: cytb\_Thryonomyidae-Hystriidae\_trimmed

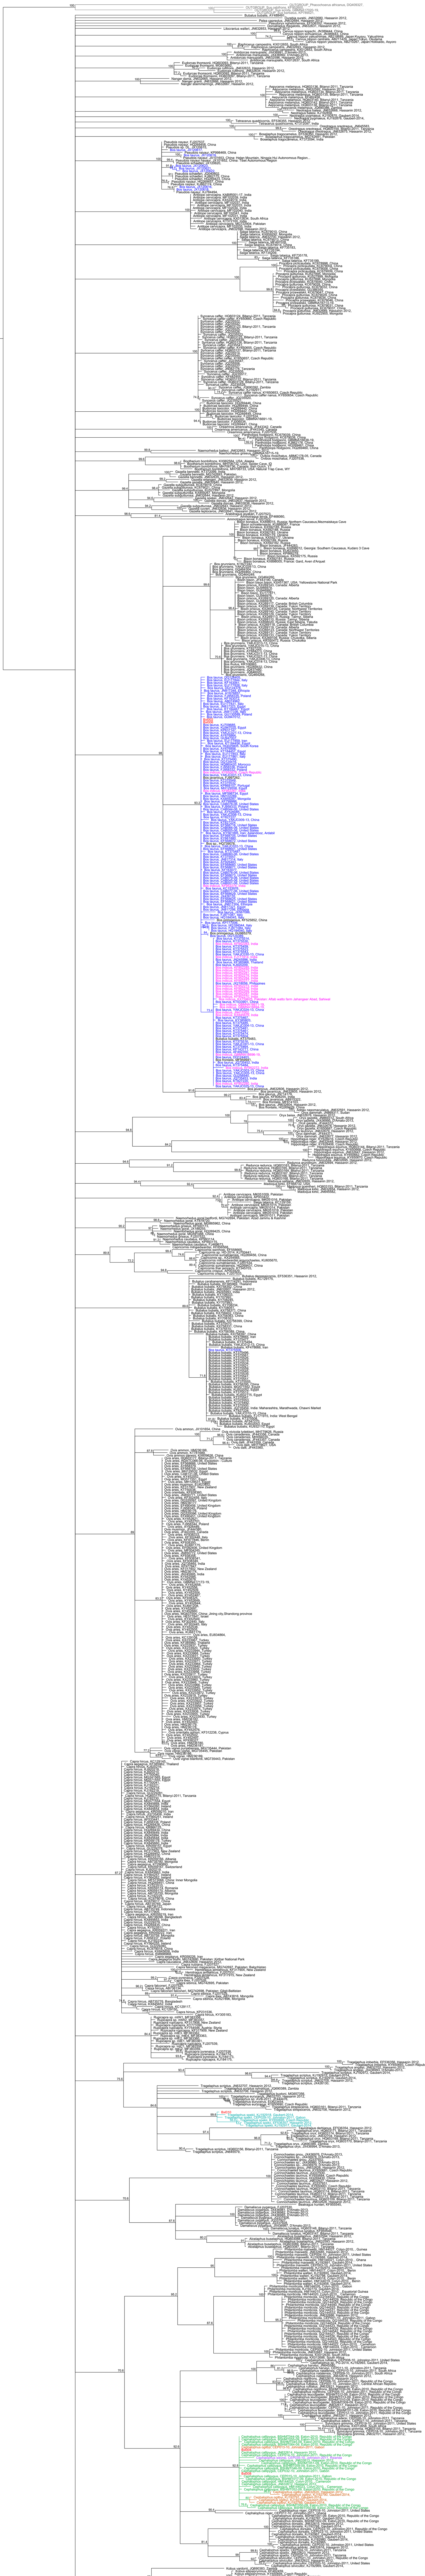

Figure S3 NJ-tree 1: COI\_Bovidae\_all

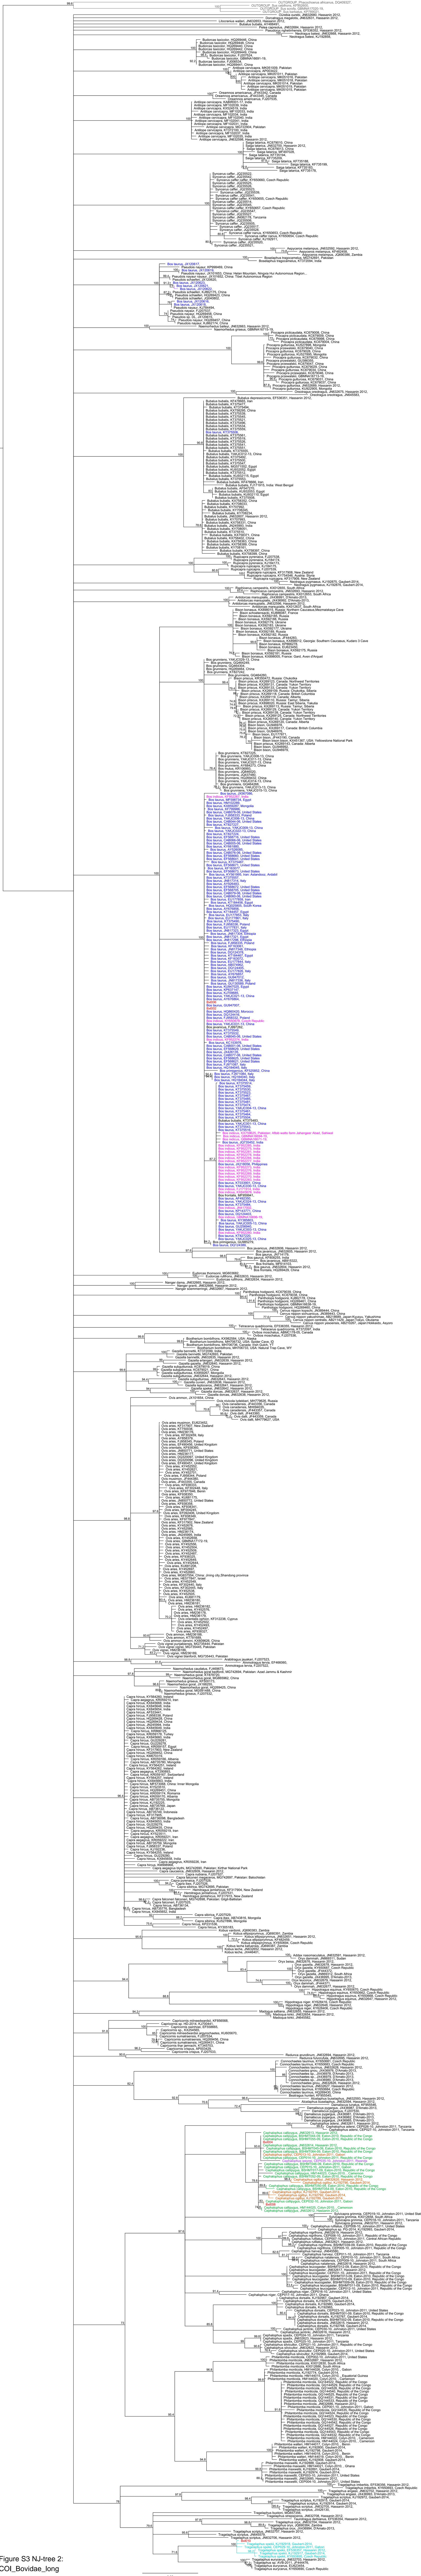

Figure S3 NJ-tree 2: COI\_Bovidae\_Jong

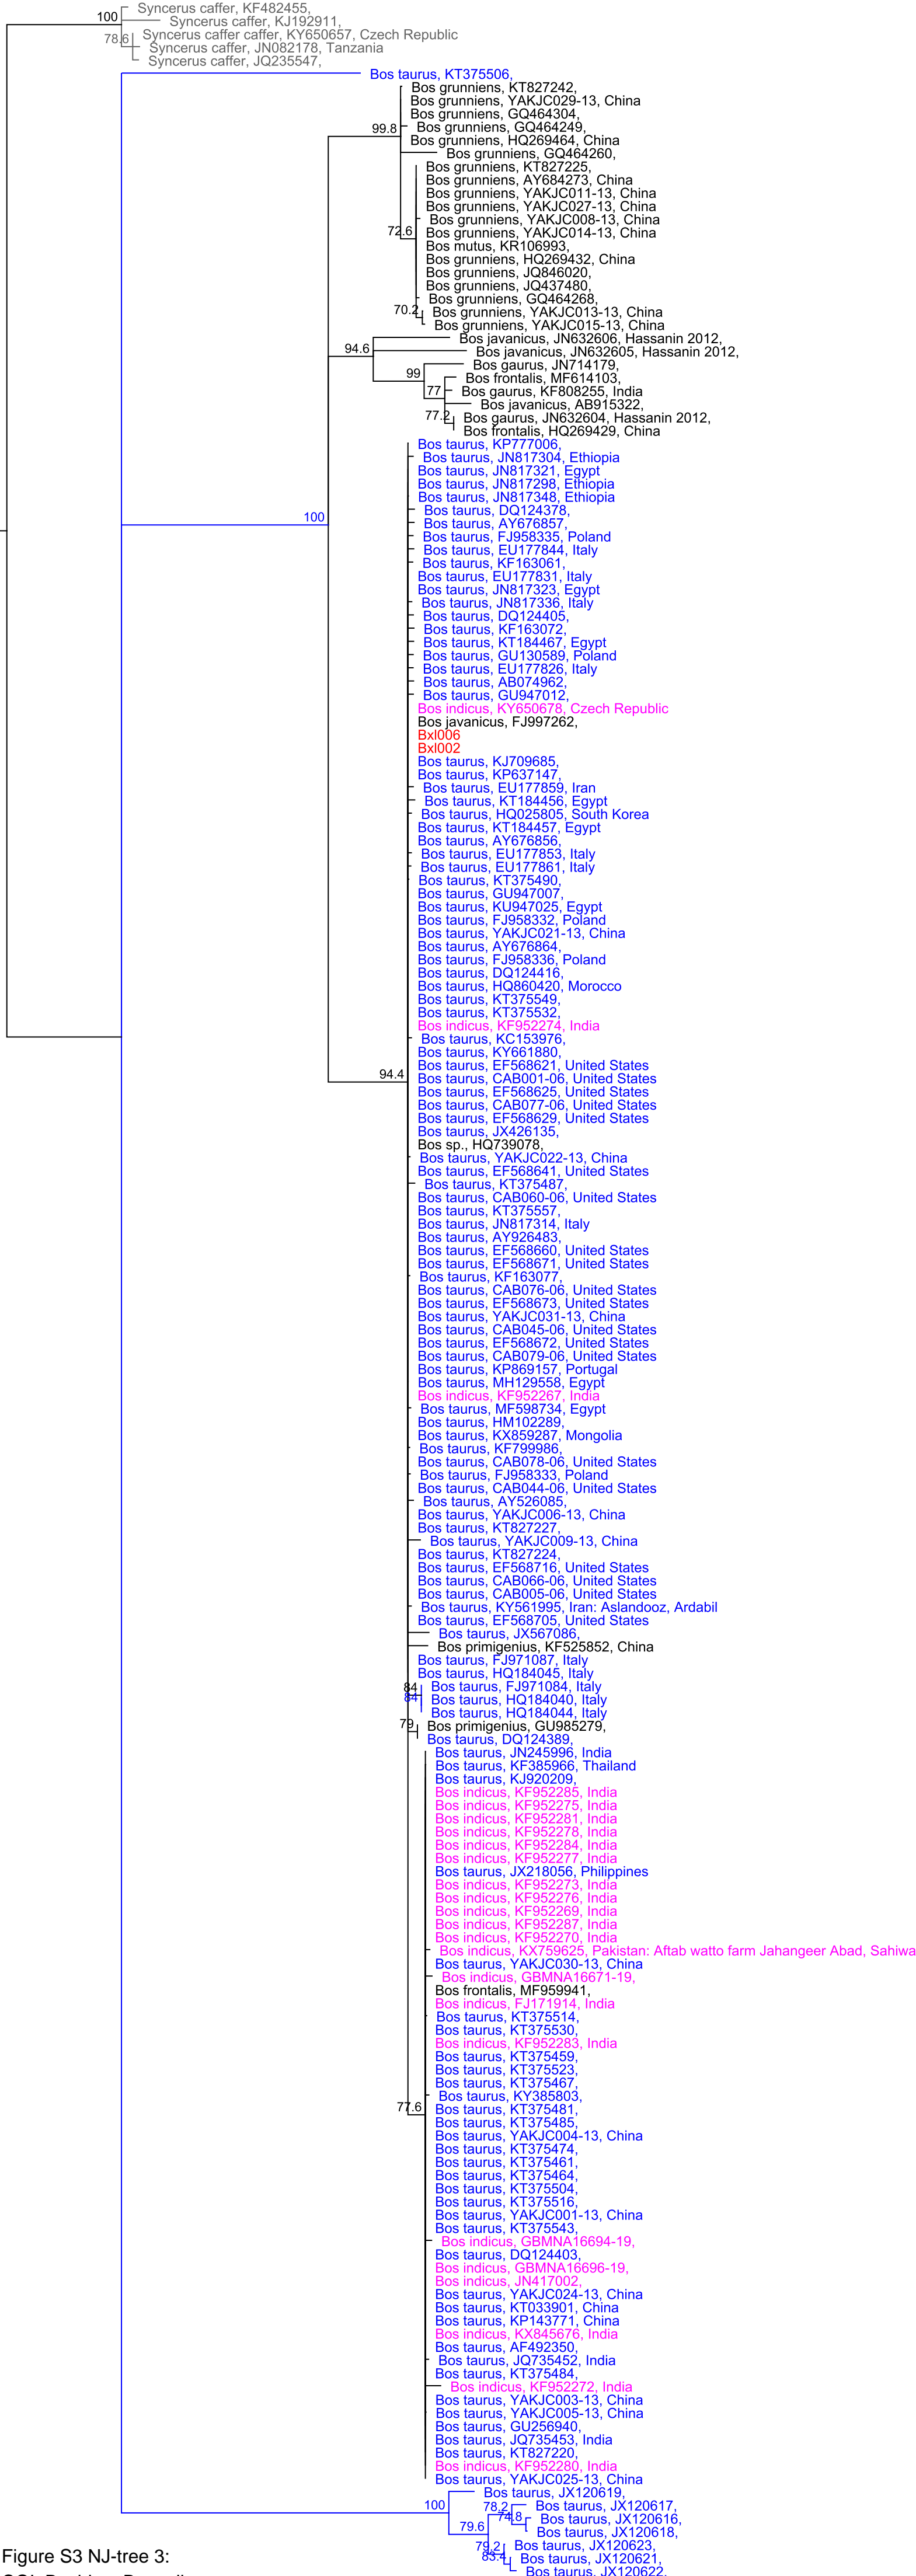

Figure S3 NJ-tree 3:  
COI\_Bovidae\_Bos\_all

0.03

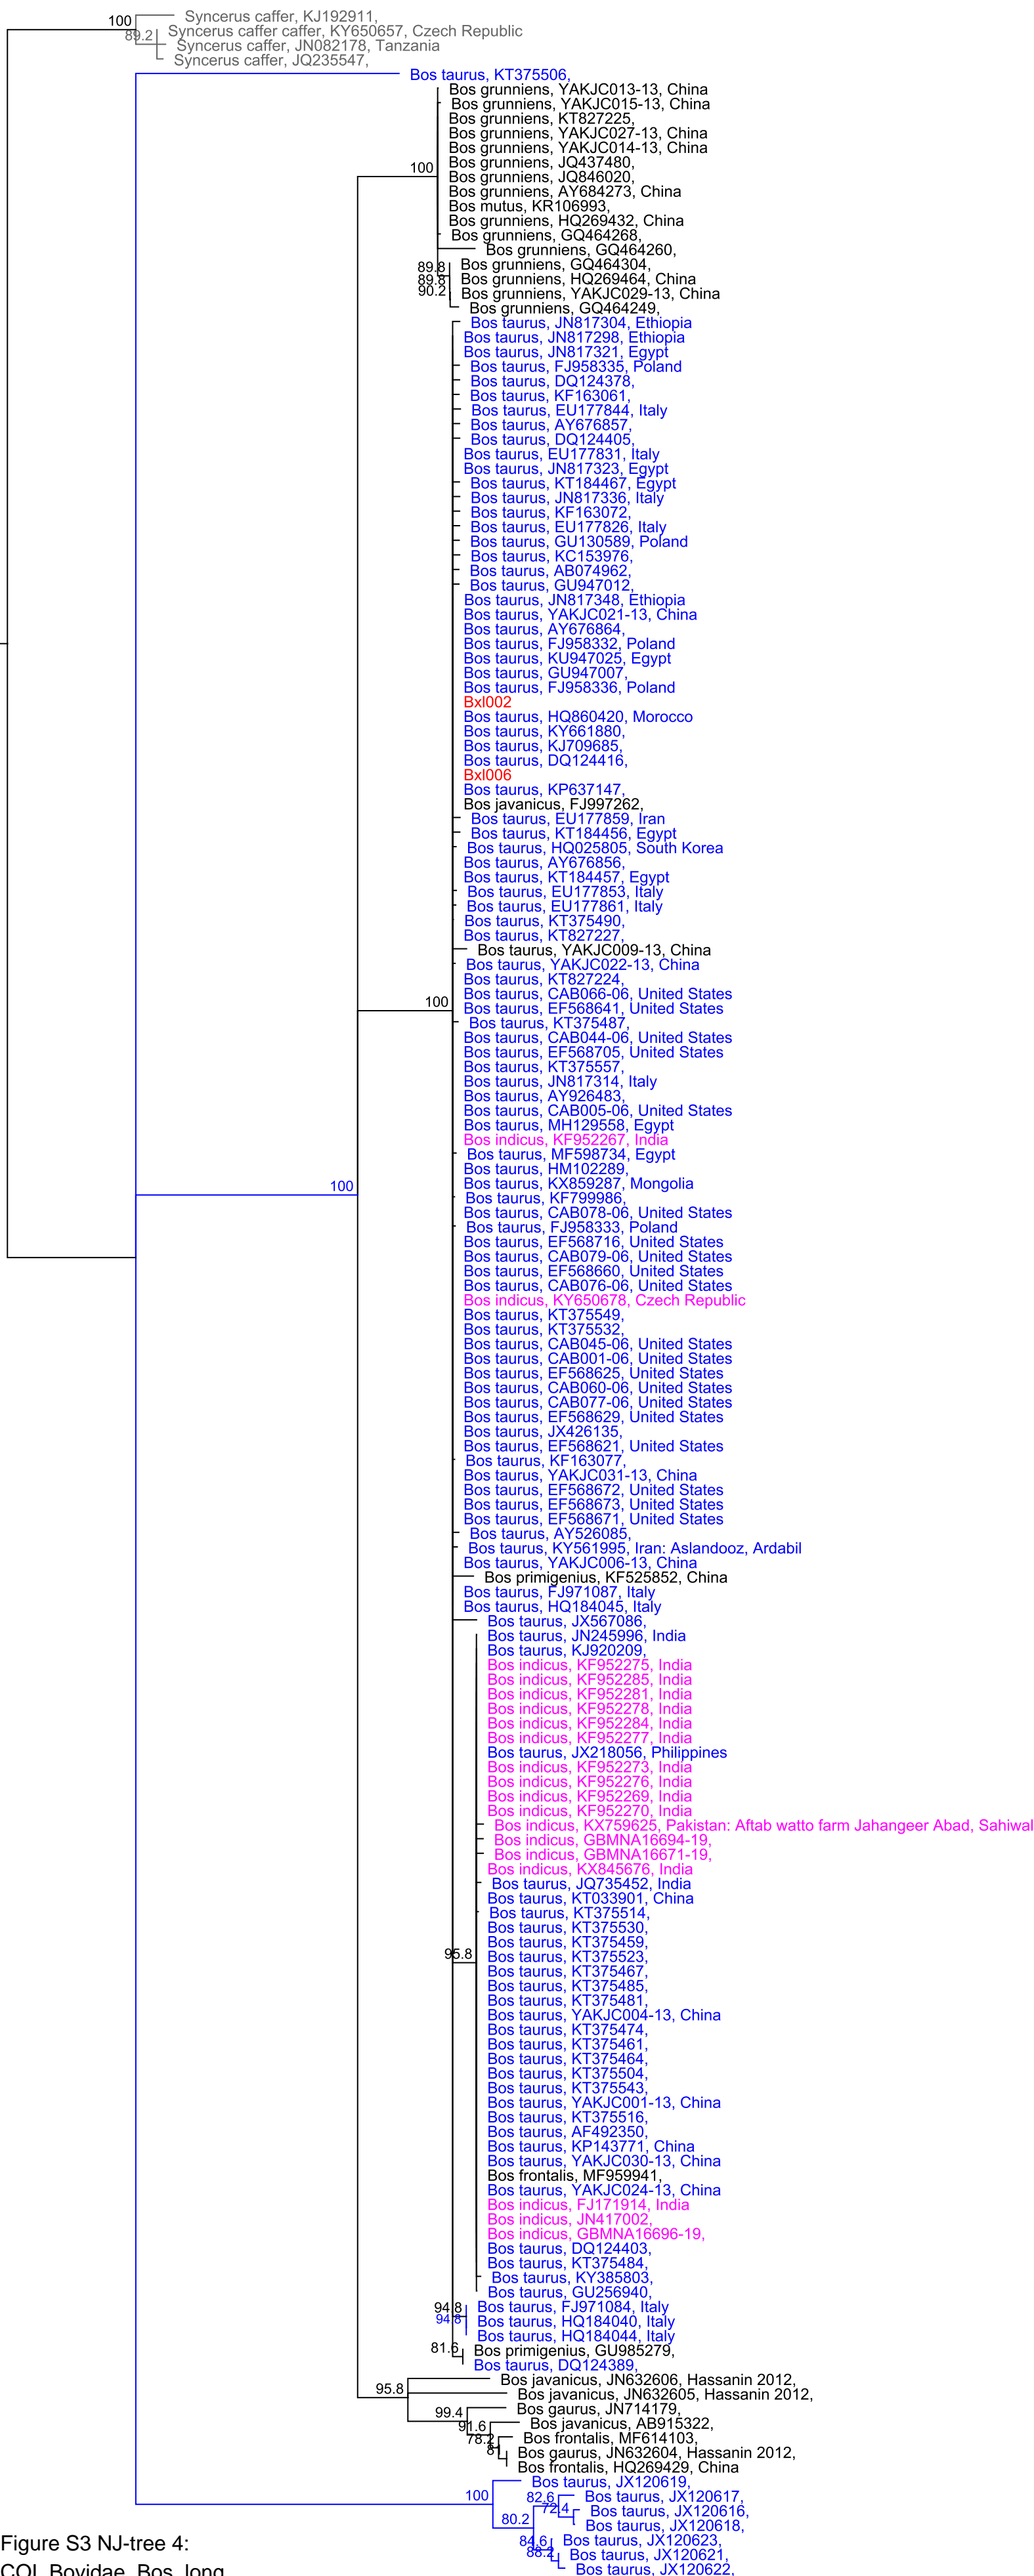

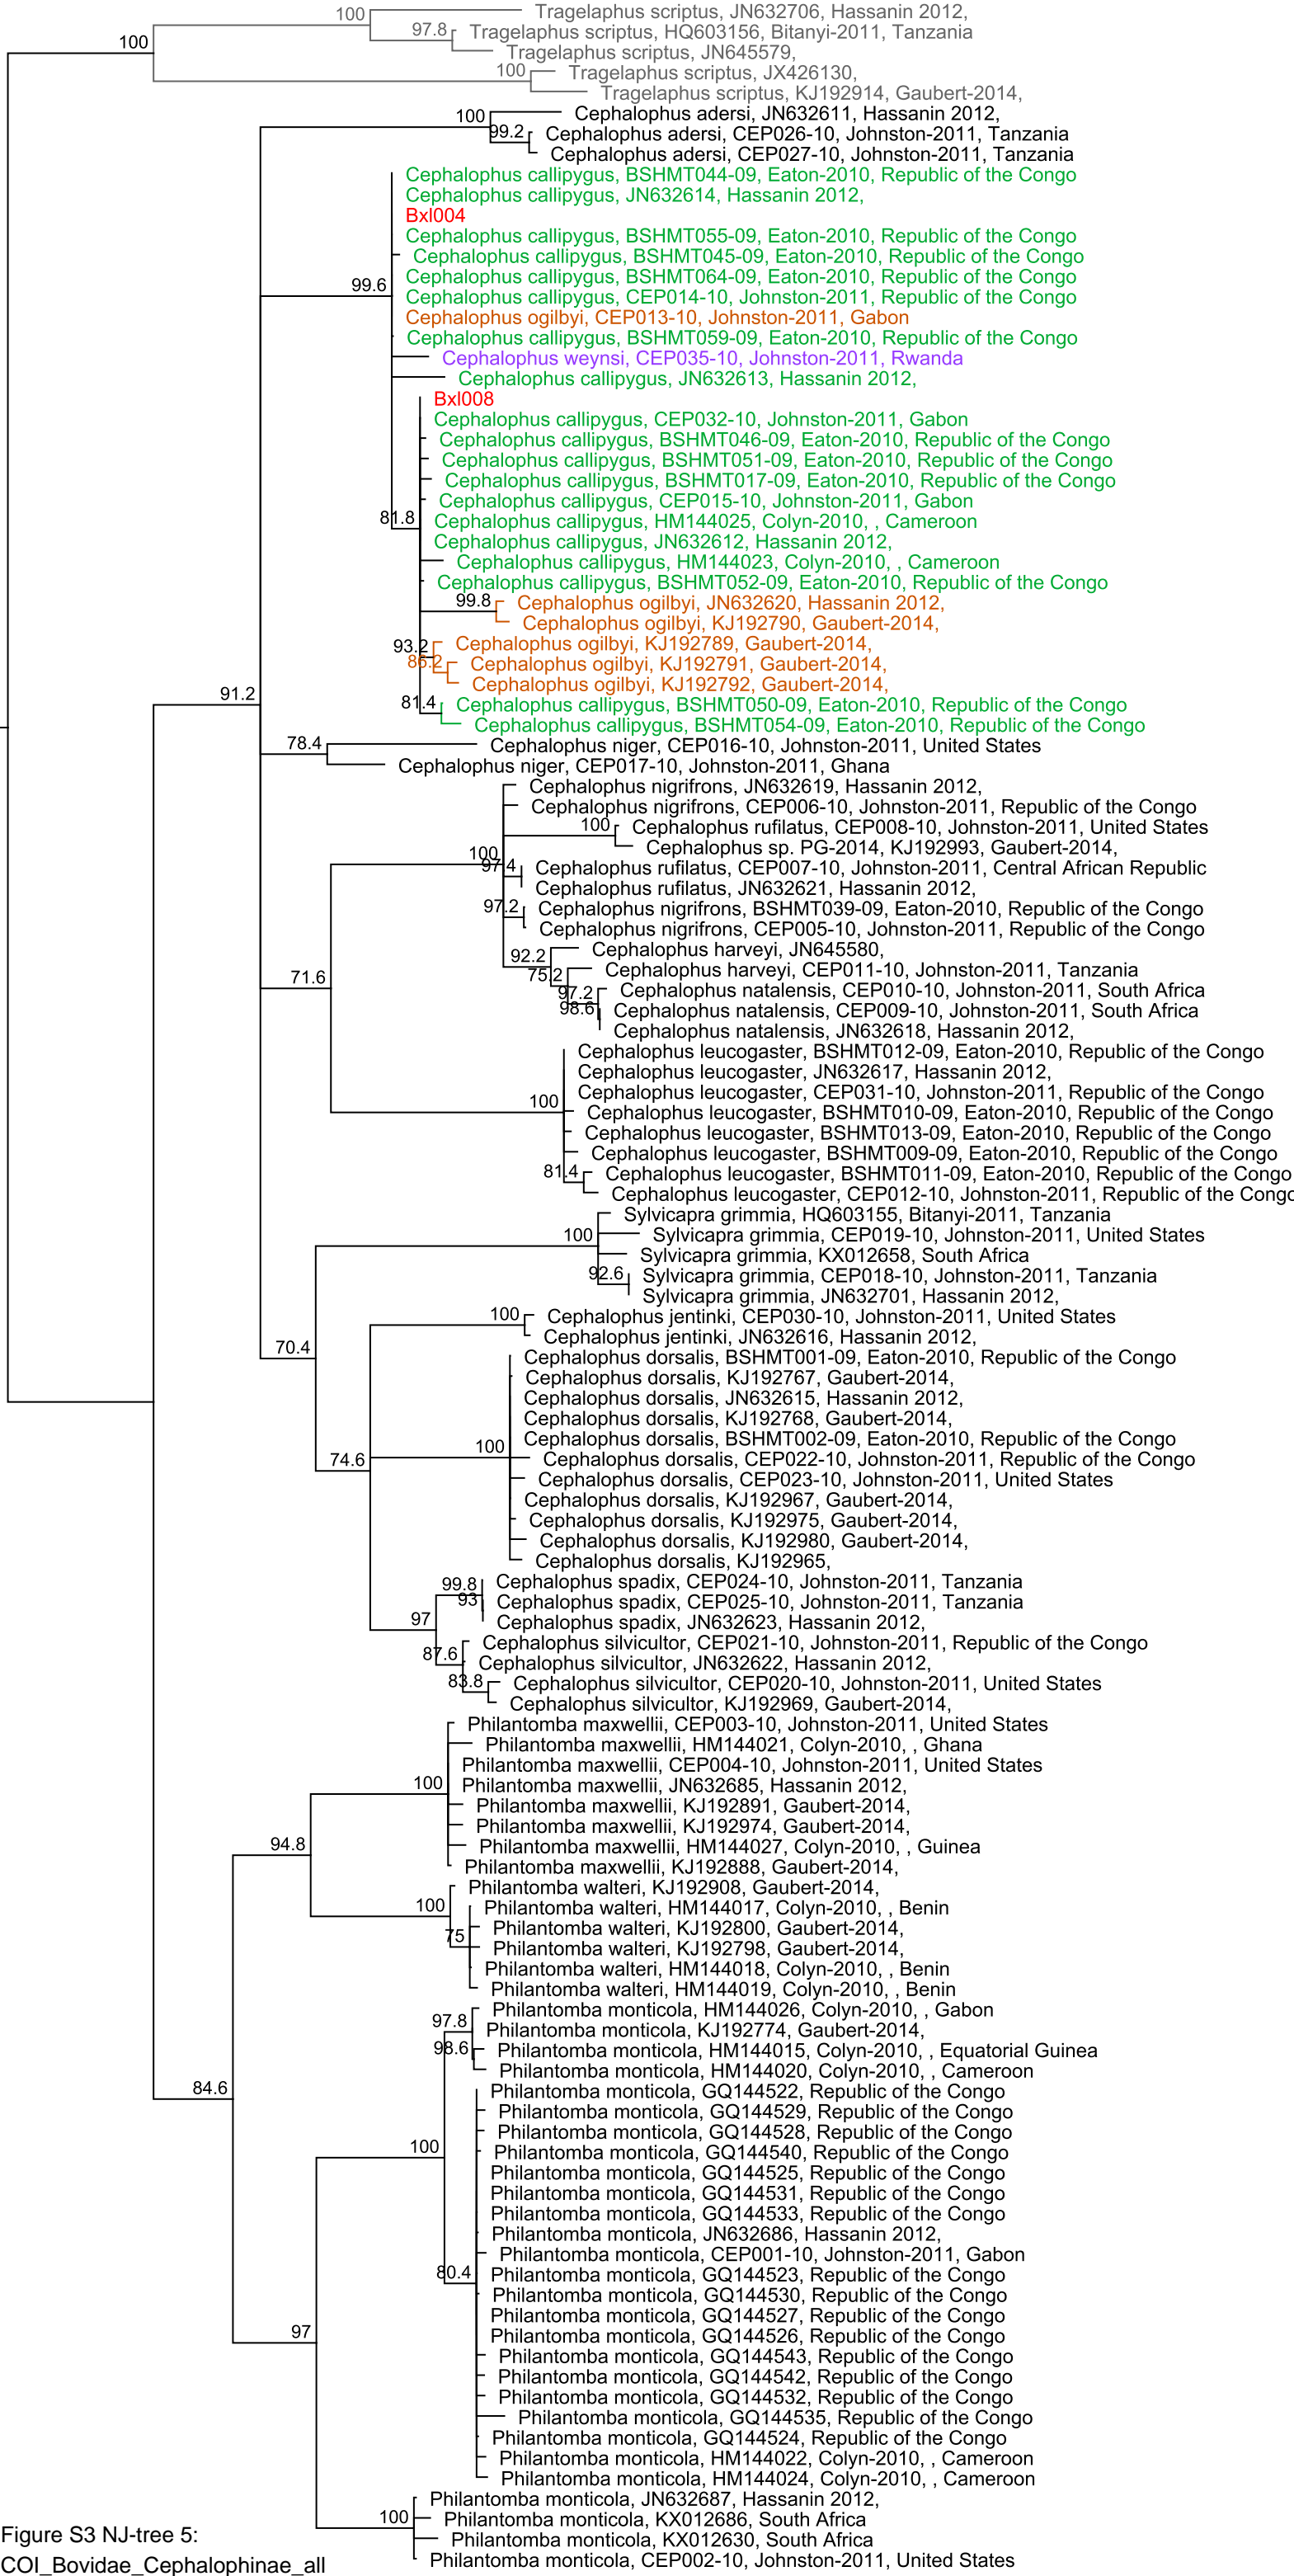

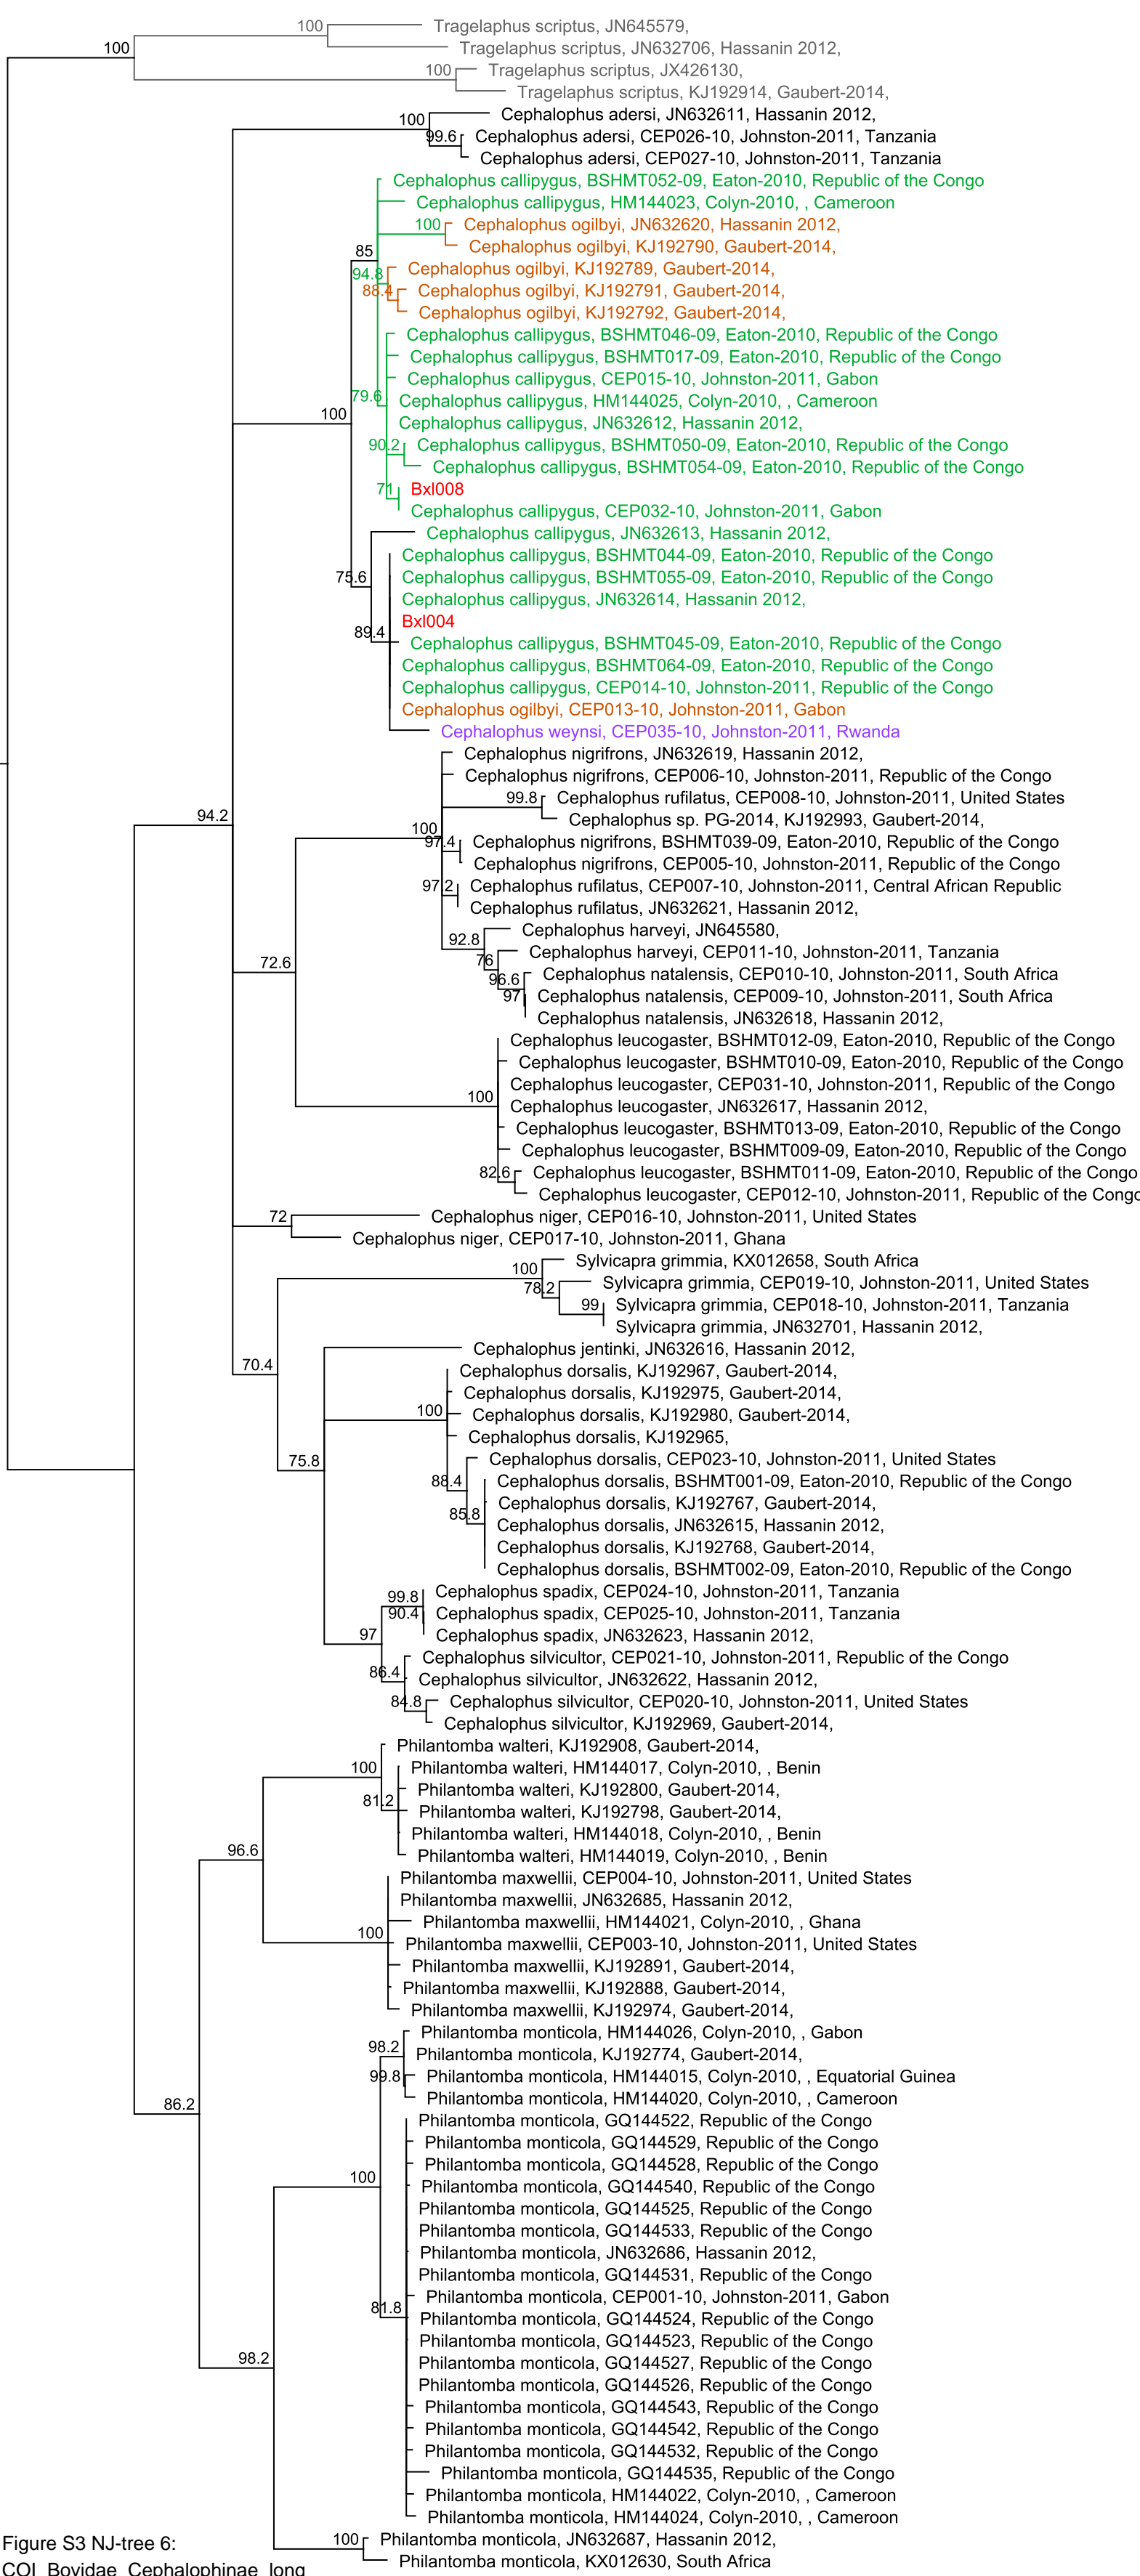

Figure S3 NJ-tree 6:

COI\_Bovidae\_Cephalophinae\_long

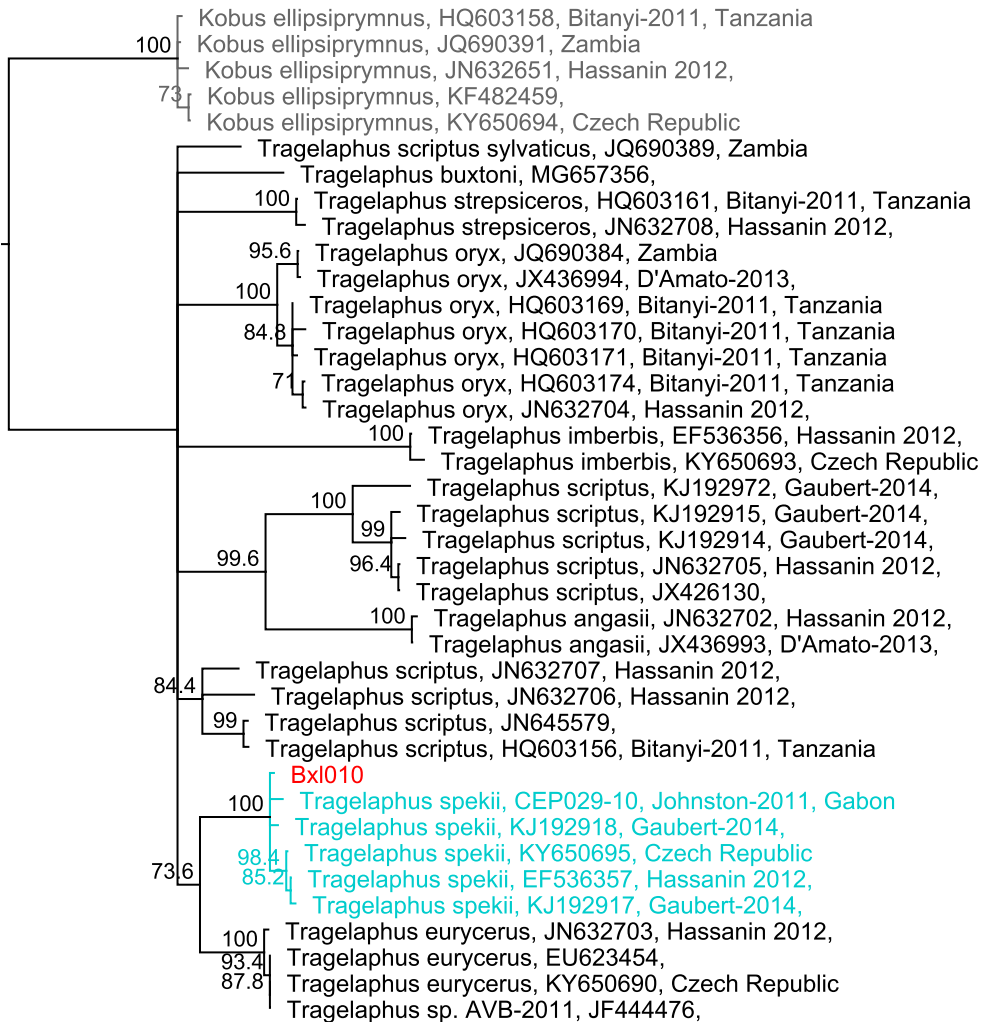

0.04

Figure S3 NJ-tree 7: COI\_Bovidae\_Tragelaphus\_all

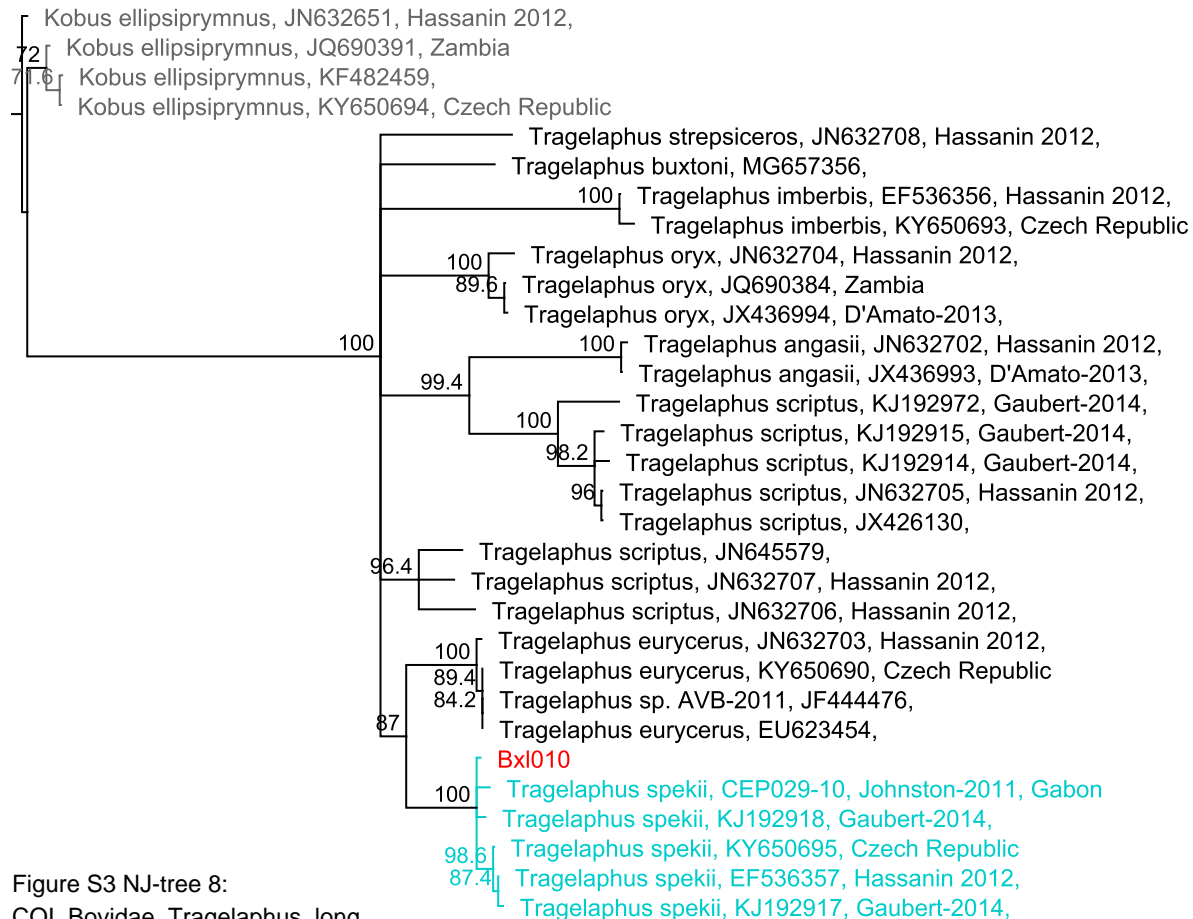

Figure S3 NJ-tree 8:  
 COI\_Bovidae\_Trachelaphus\_long

0.04

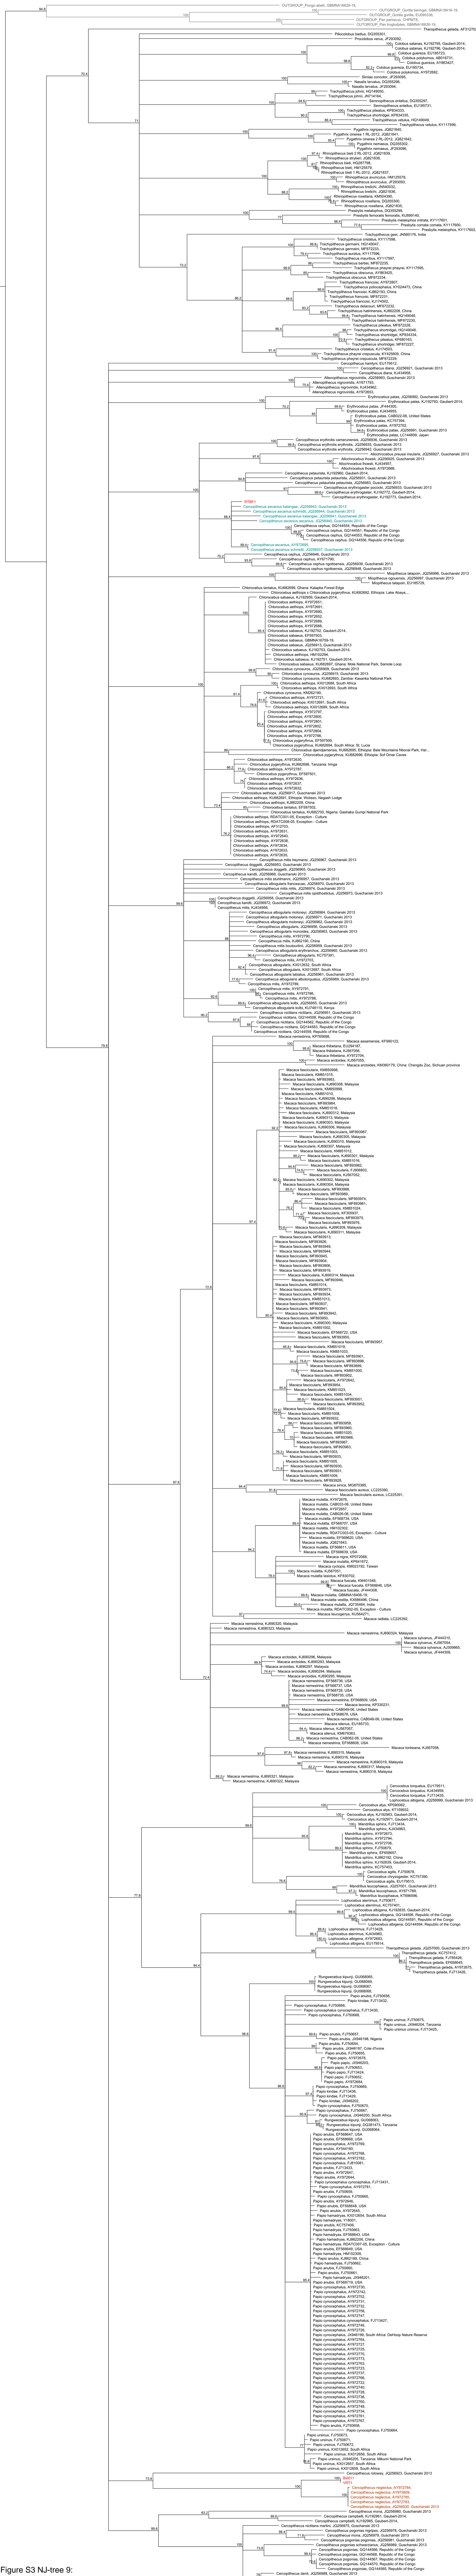

Figure S3 NJ-tree 9:

COI\_Cercopithecidae\_all

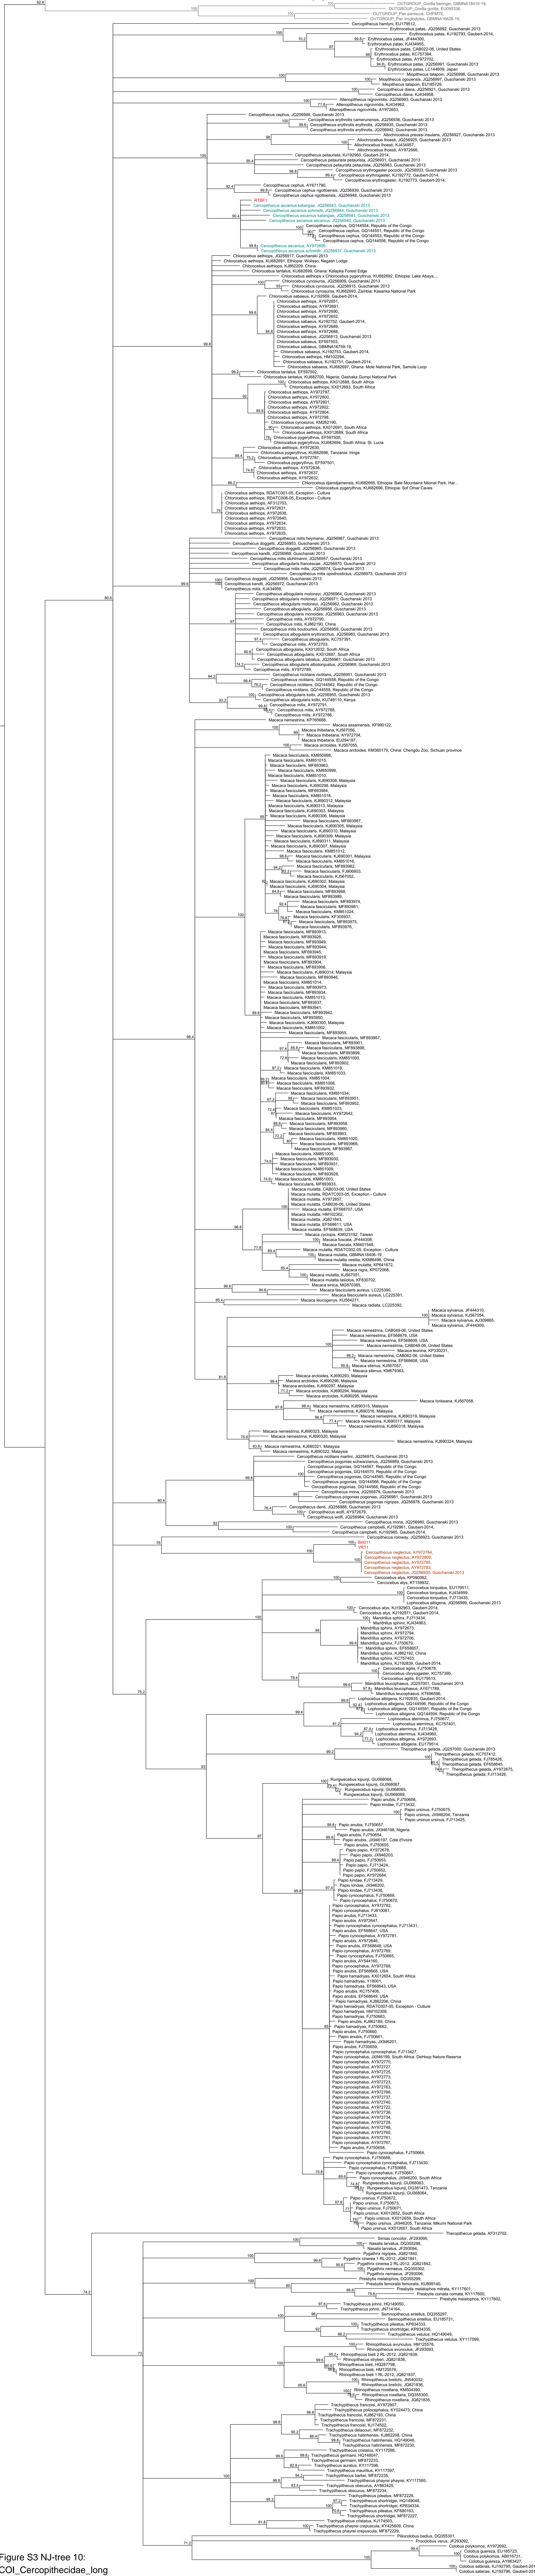

Figure S3 NJ-tree 10:

COI\_Cercopithecidae\_long

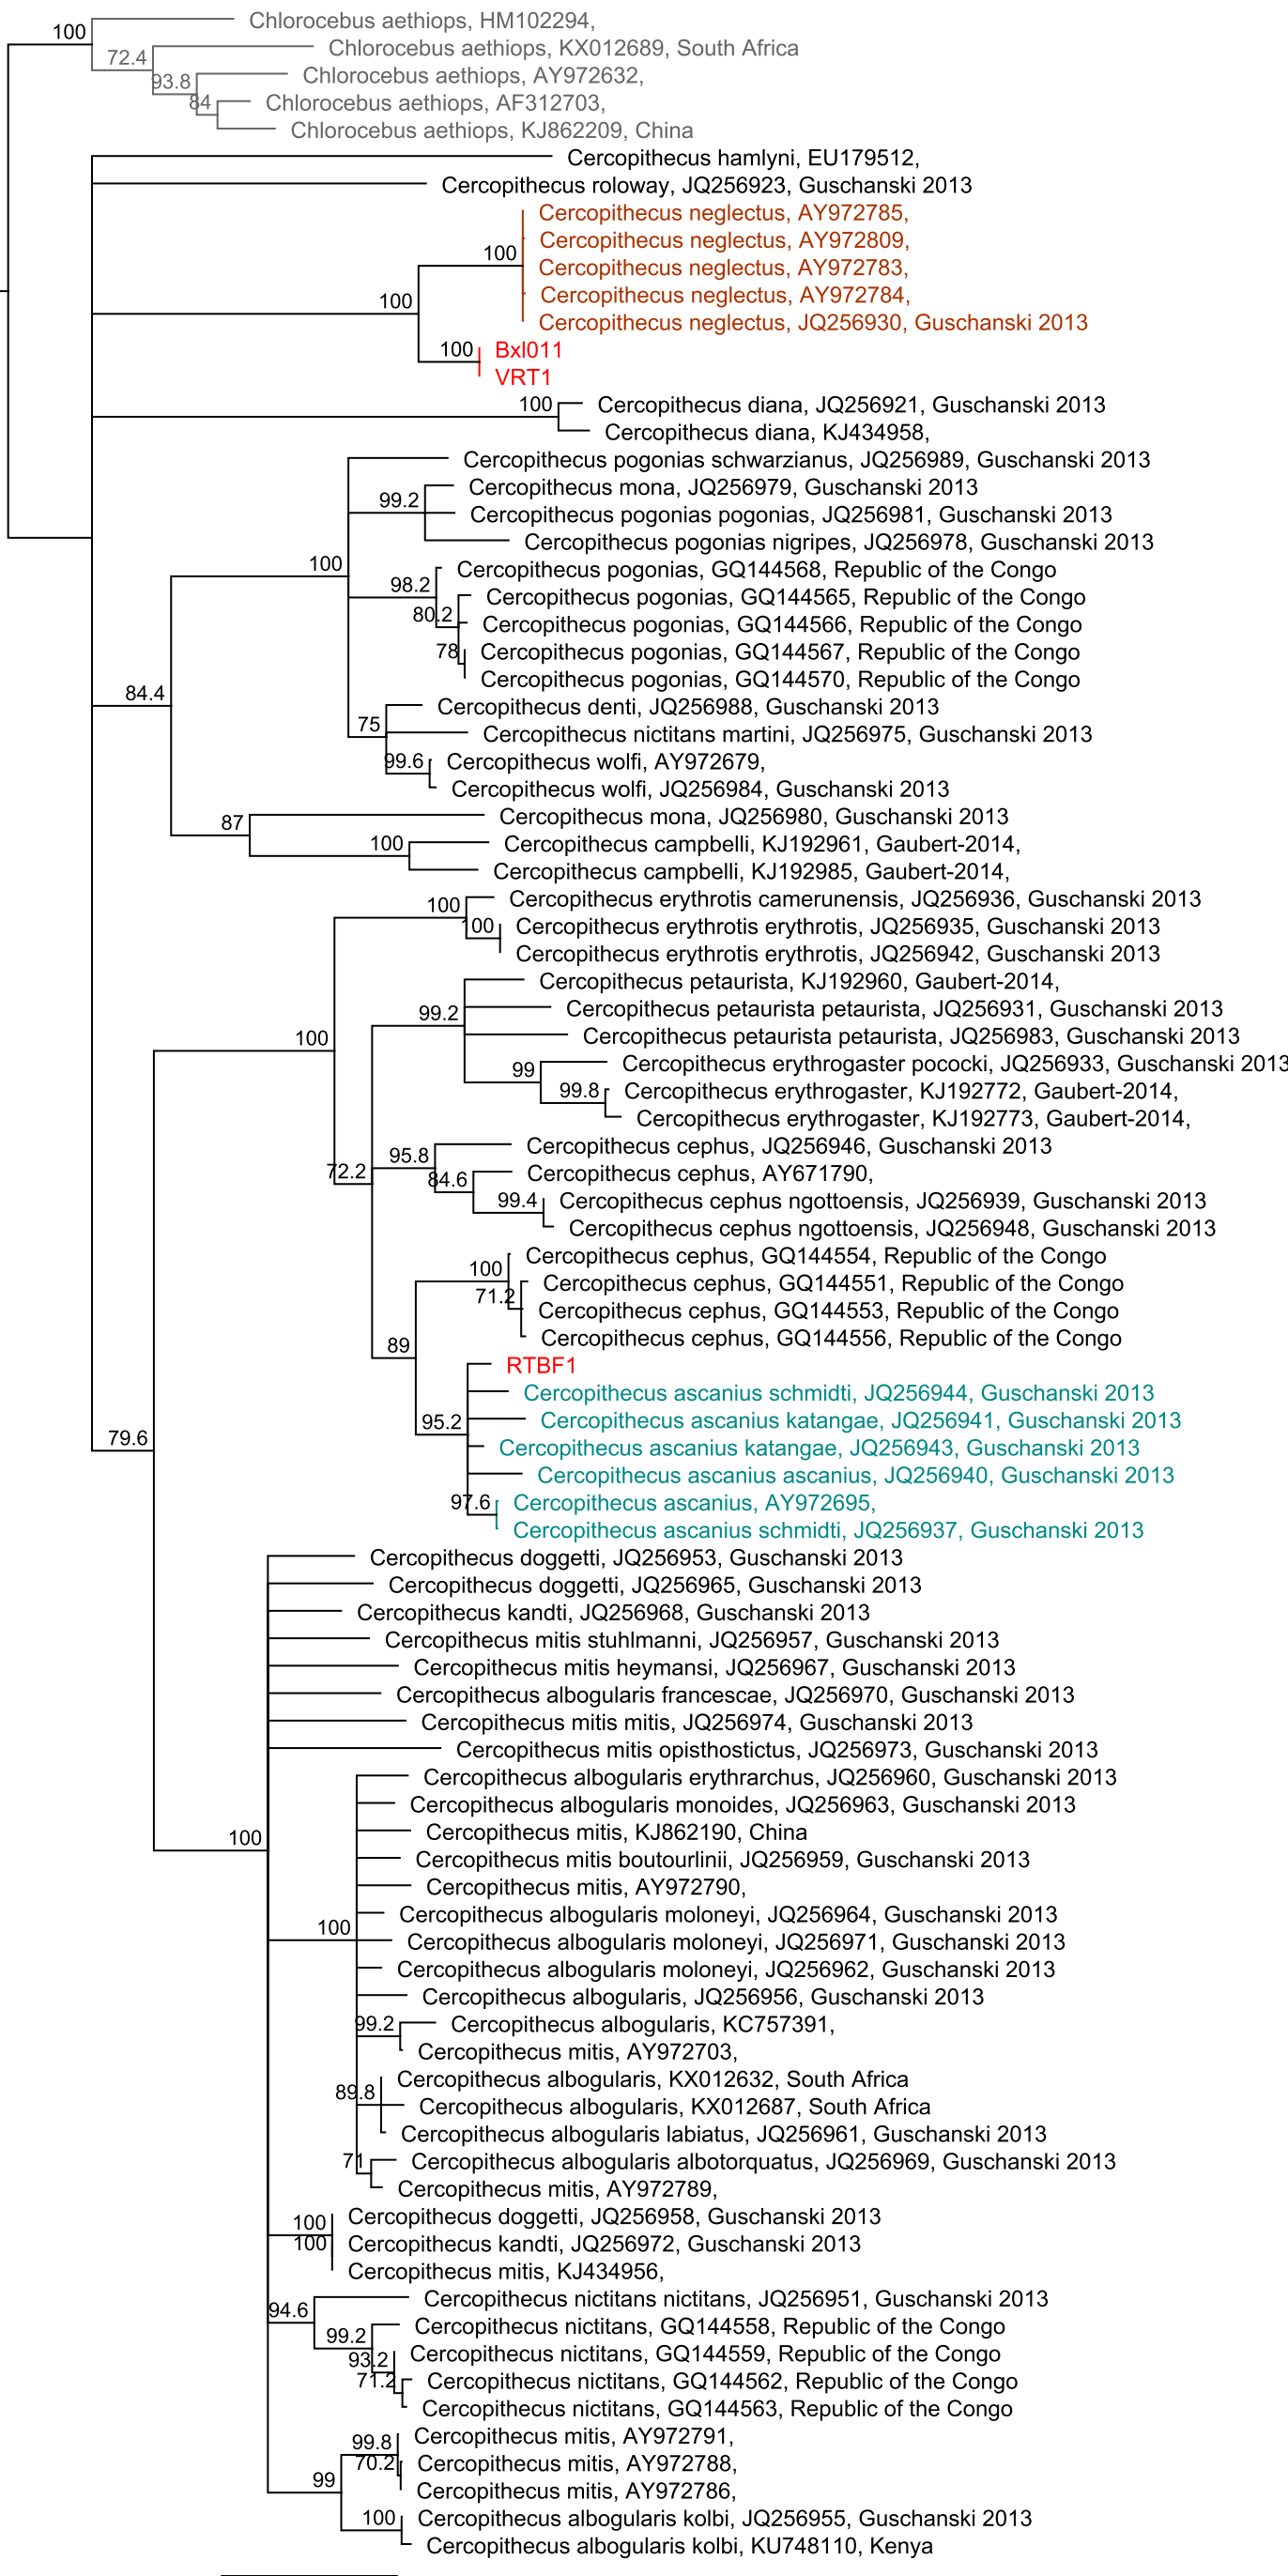

Figure S3 NJ-tree 11: COI\_Cercopithecidae\_Cercopithecus\_all

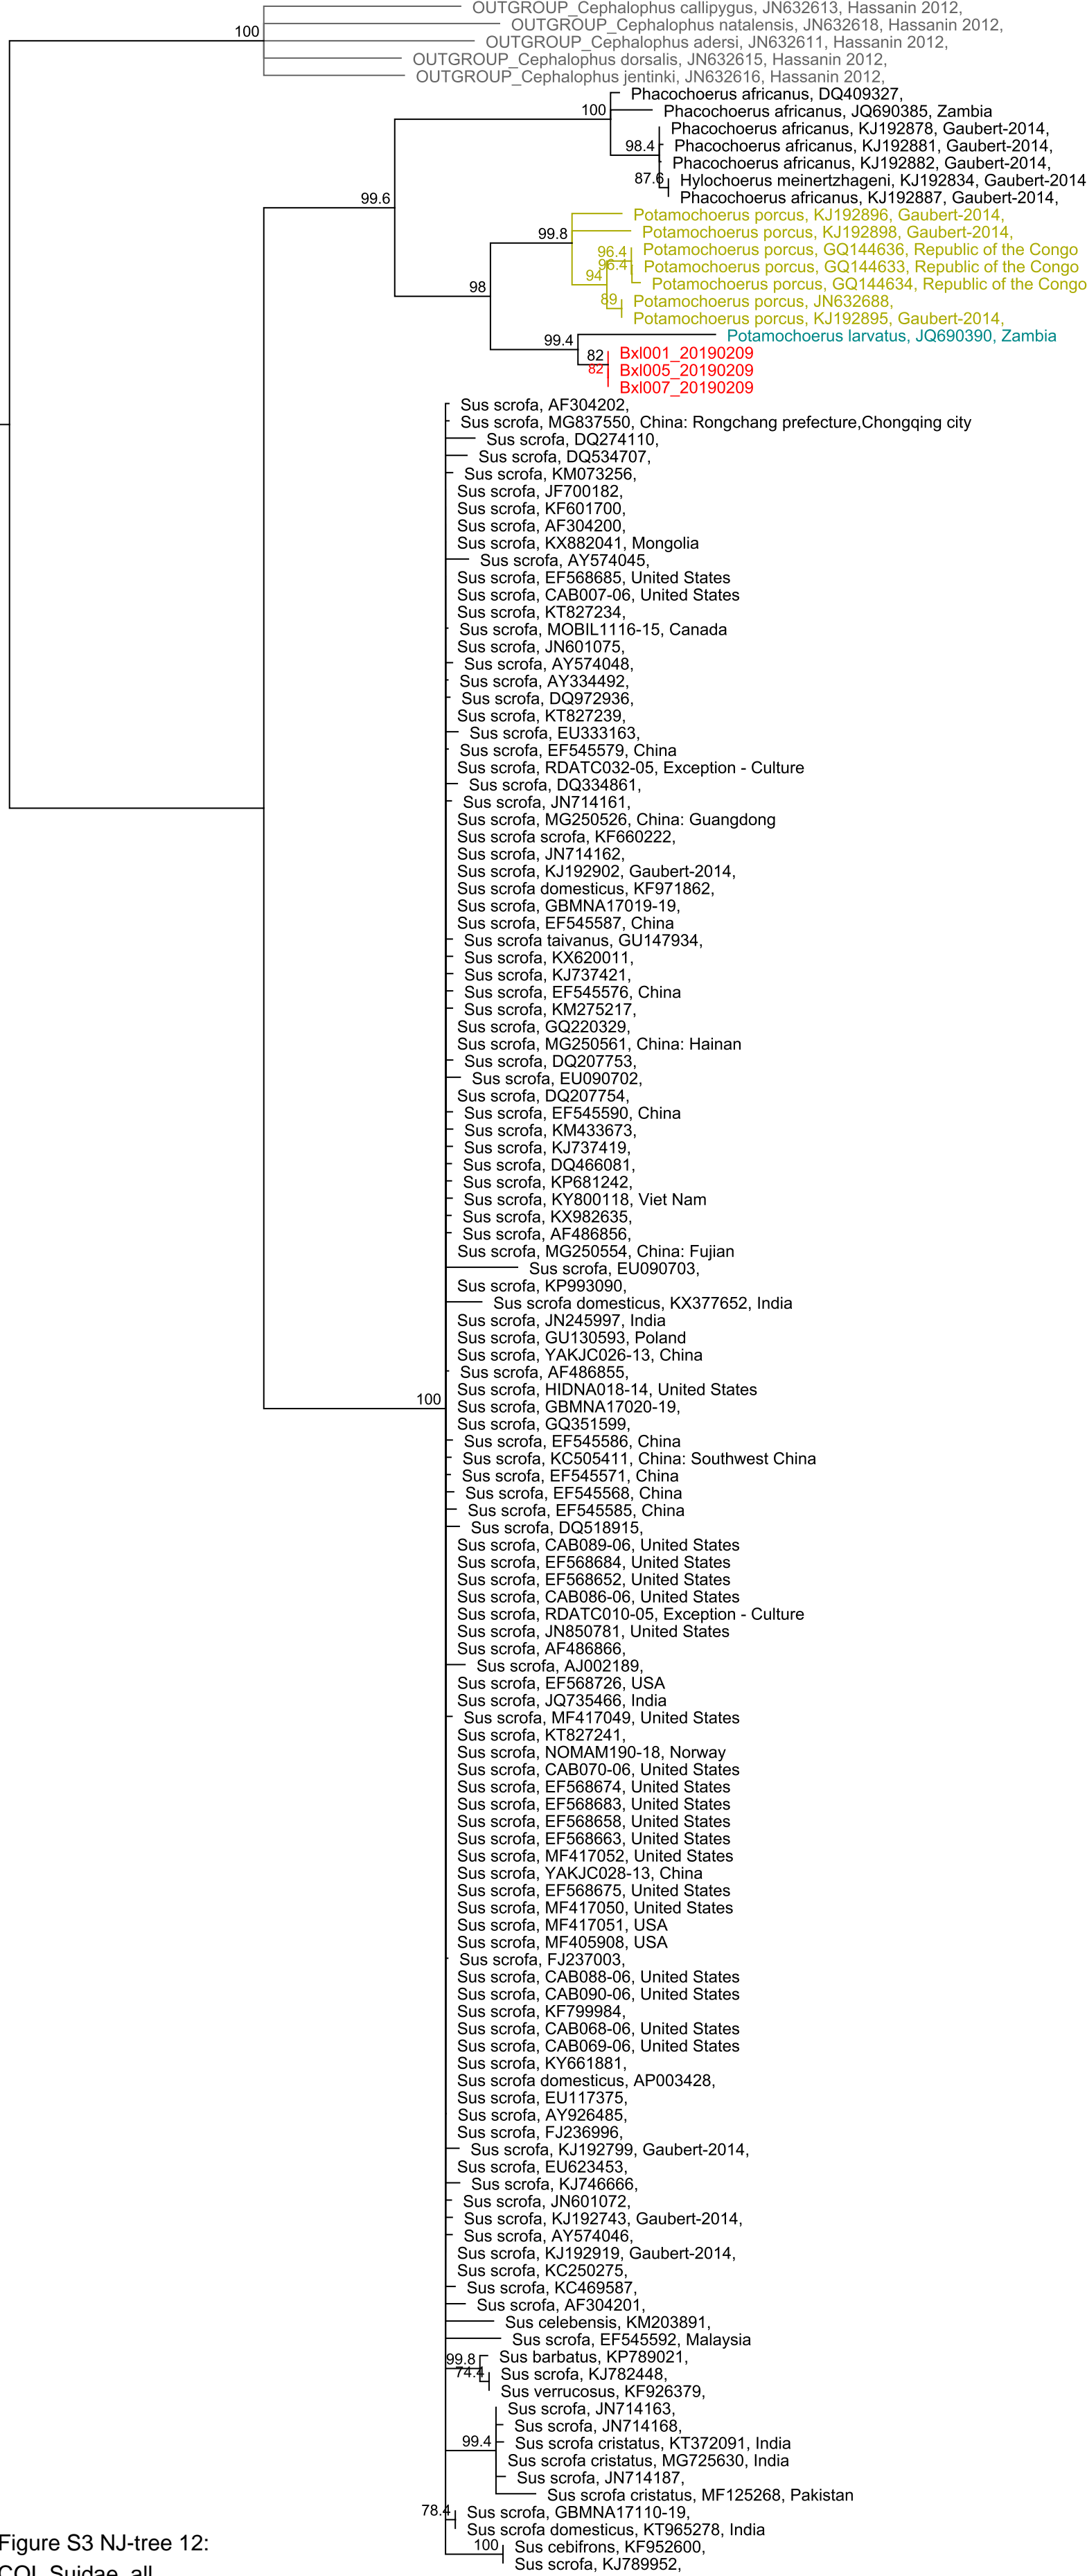

Figure S3 NJ-tree 12:

COI\_Suidae\_all

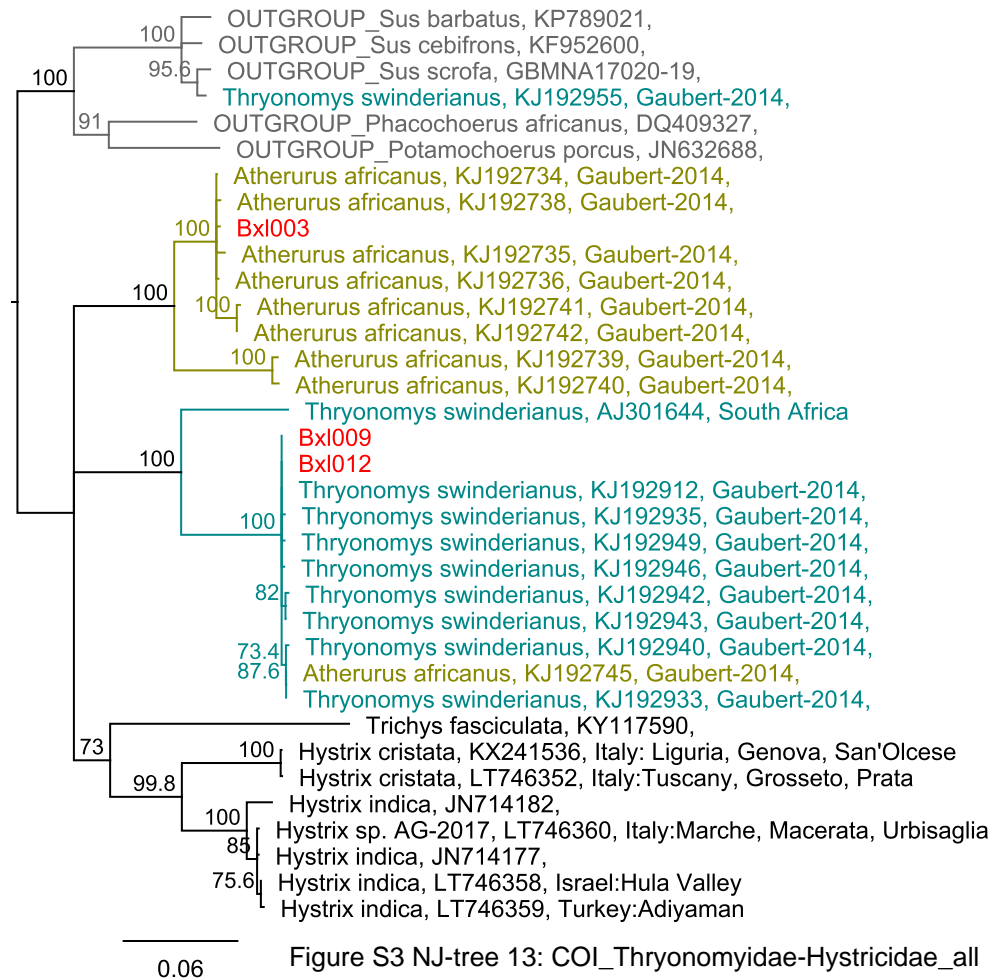

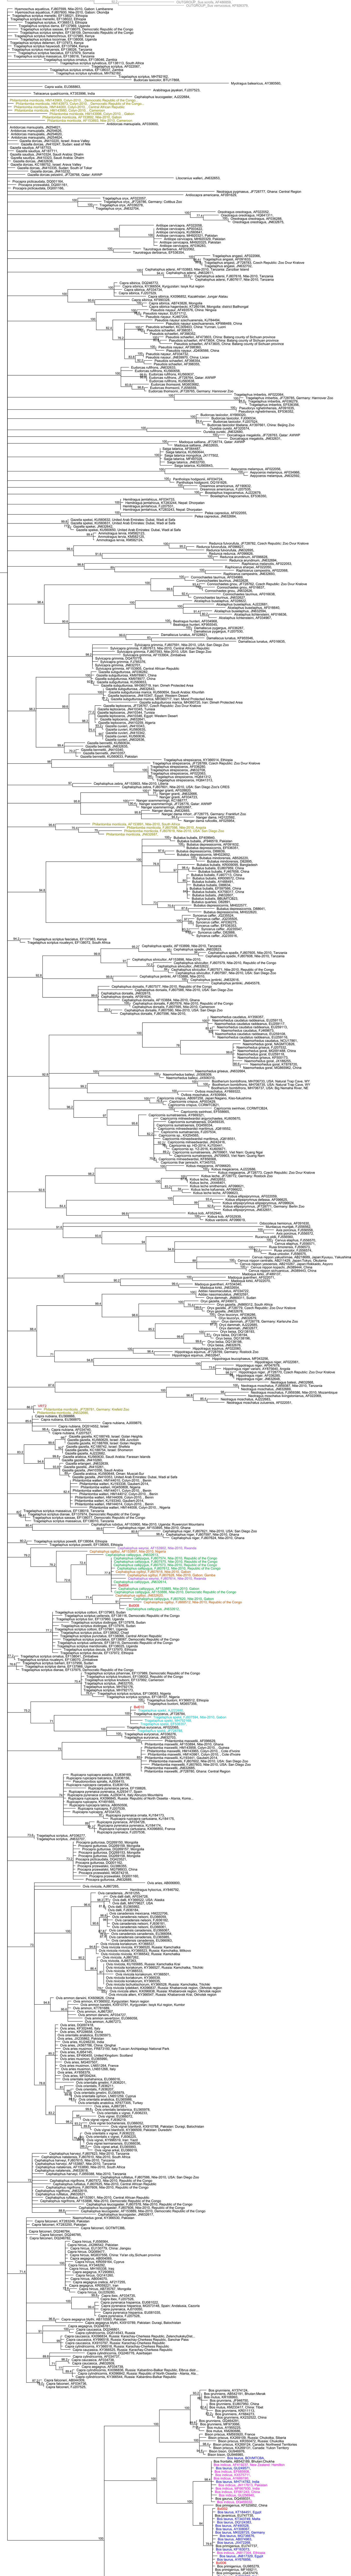

Figure S3 NJ-tree 14:  
cyyb\_Bovidae\_all

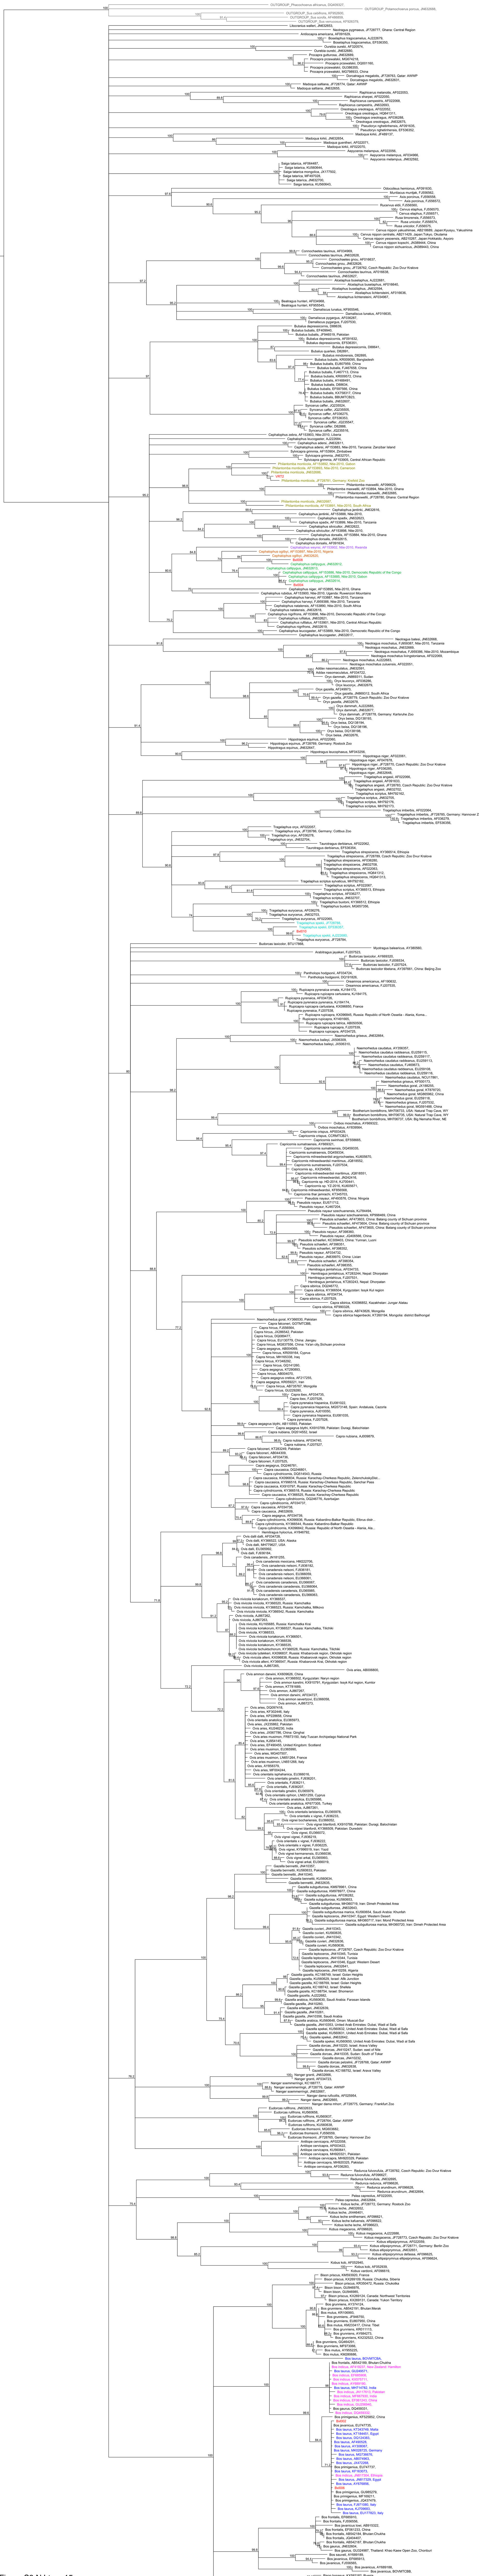

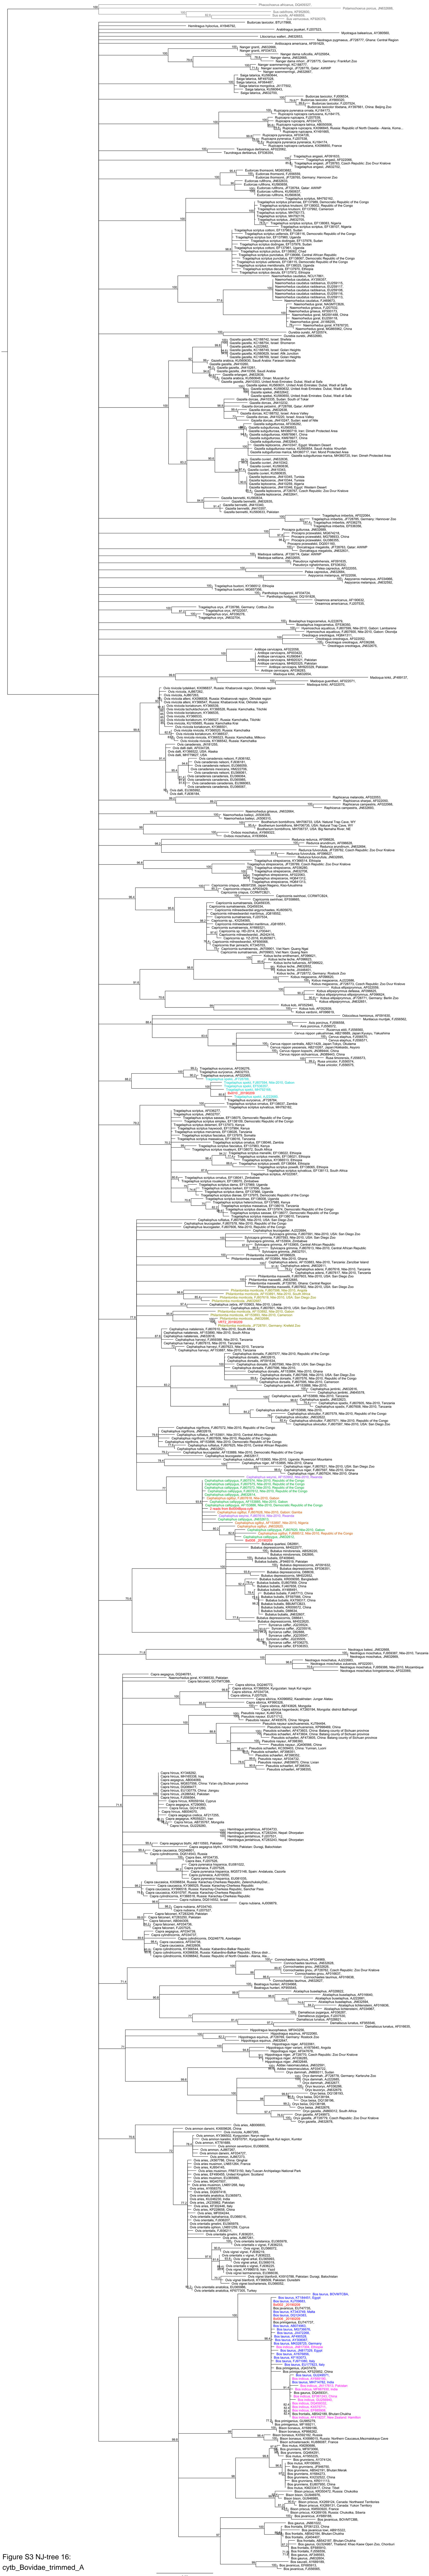

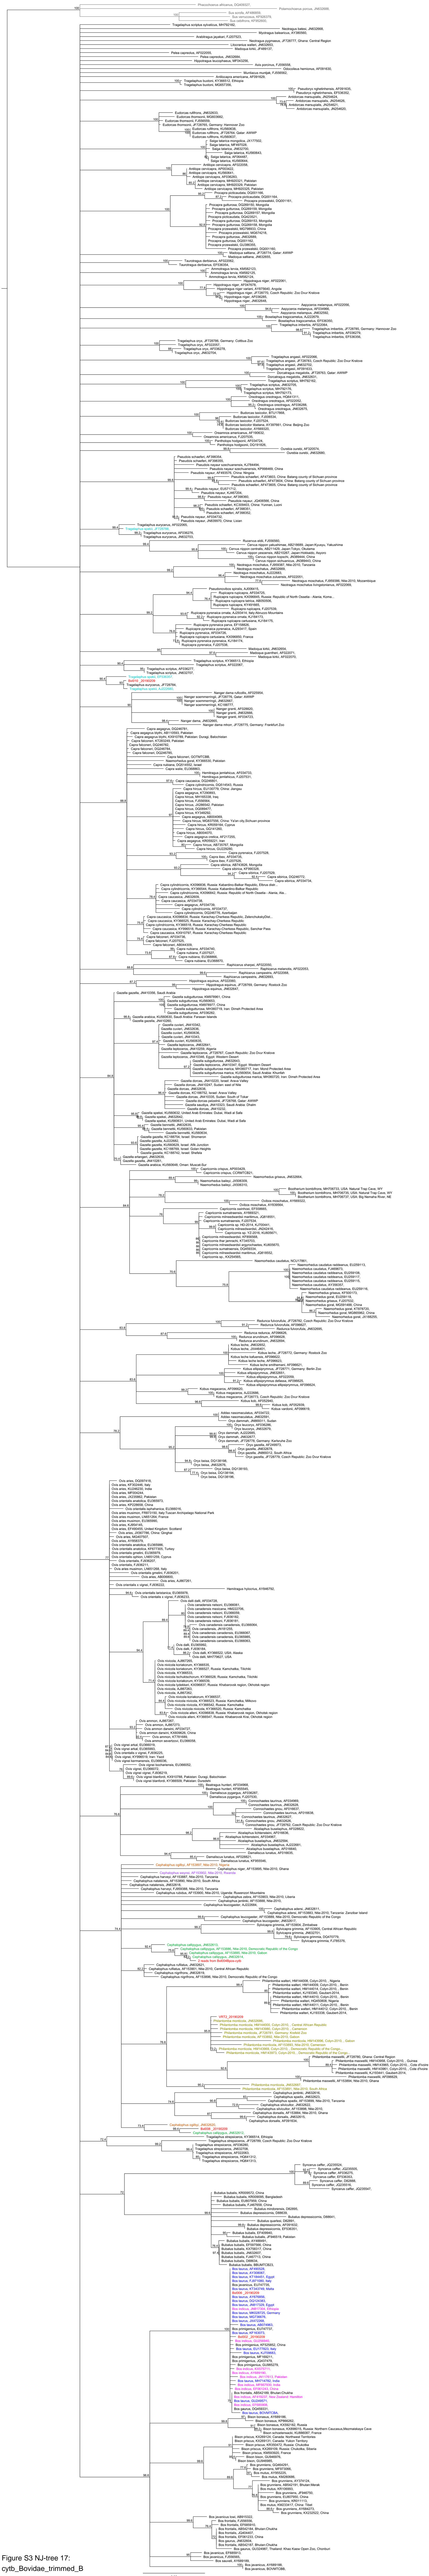

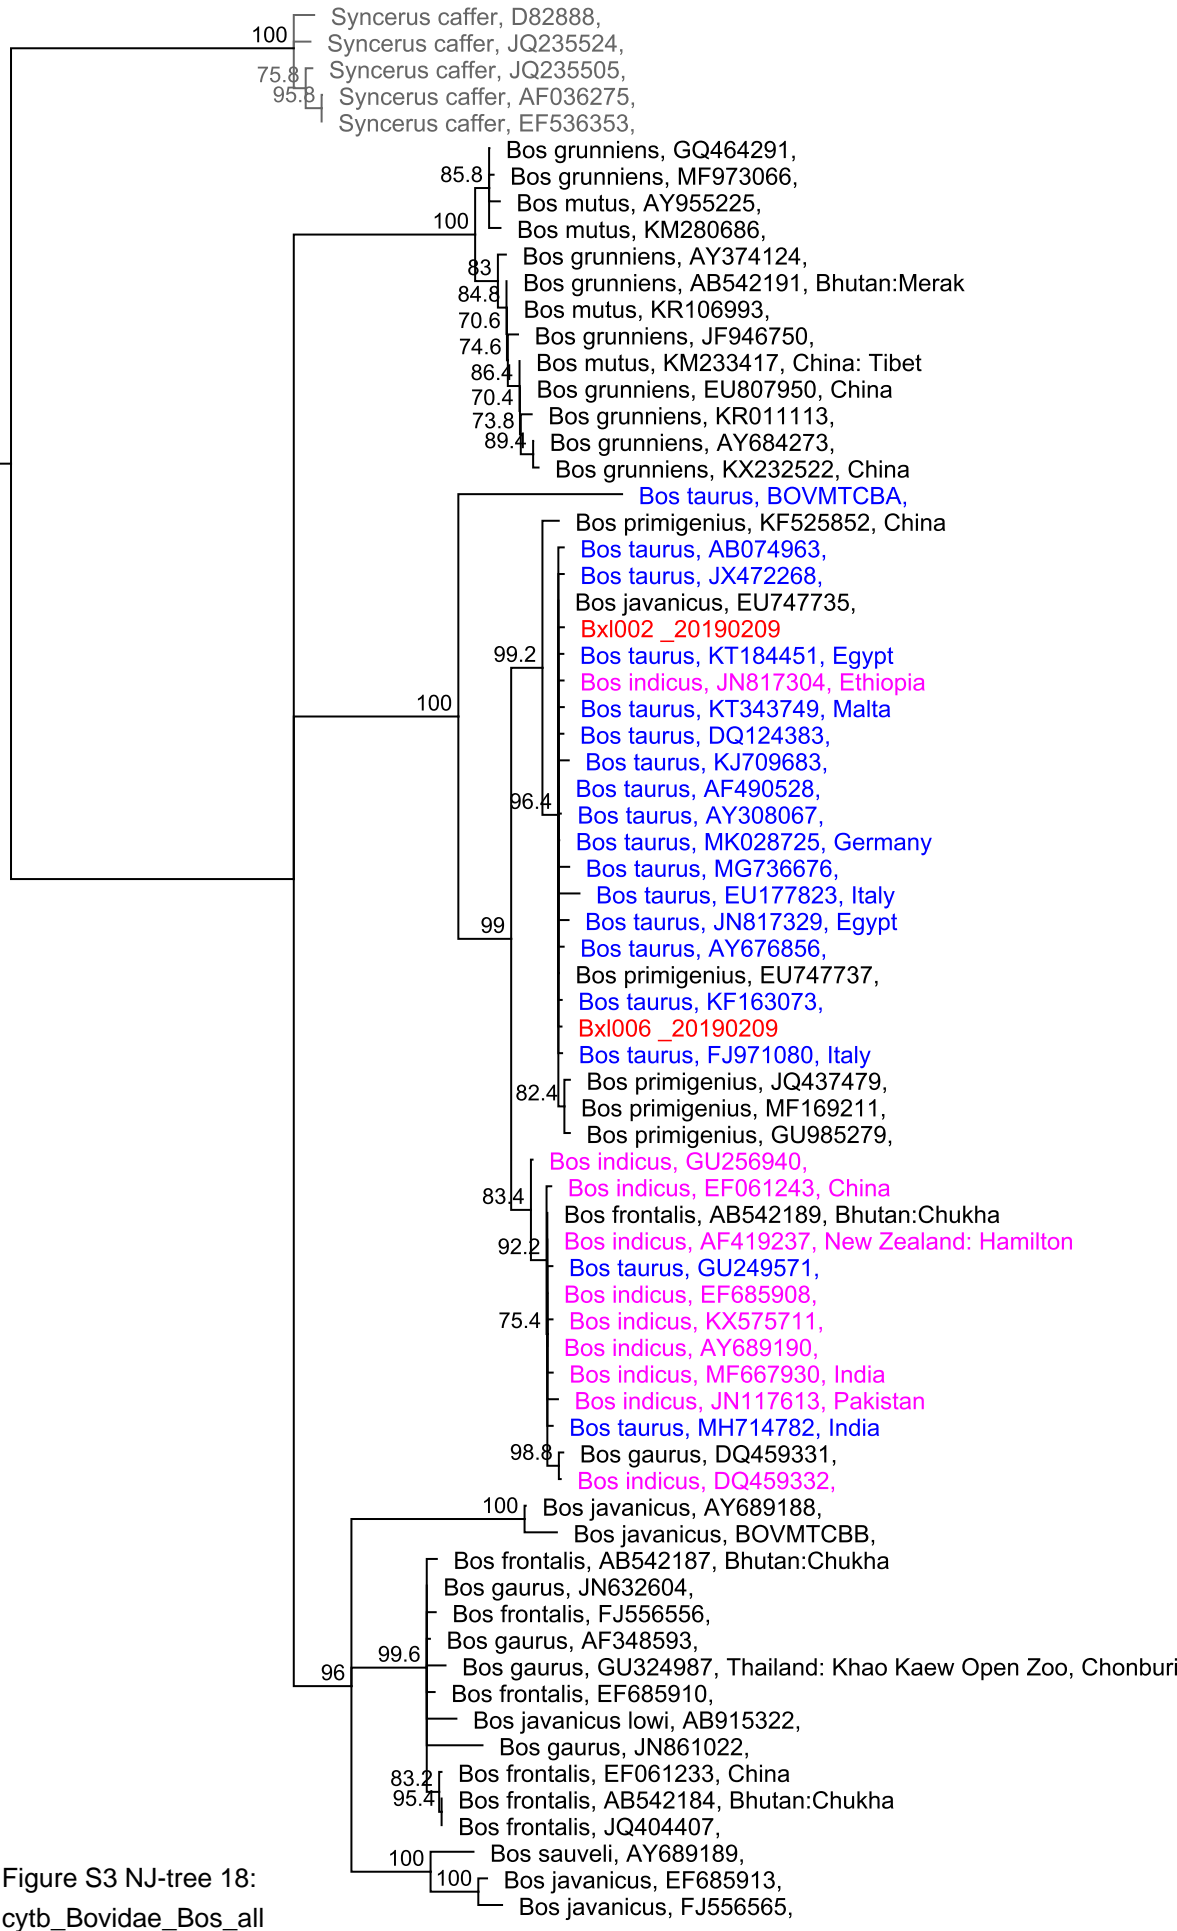

Figure S3 NJ-tree 18:  
 cytb\_Bovidae\_Bos\_all

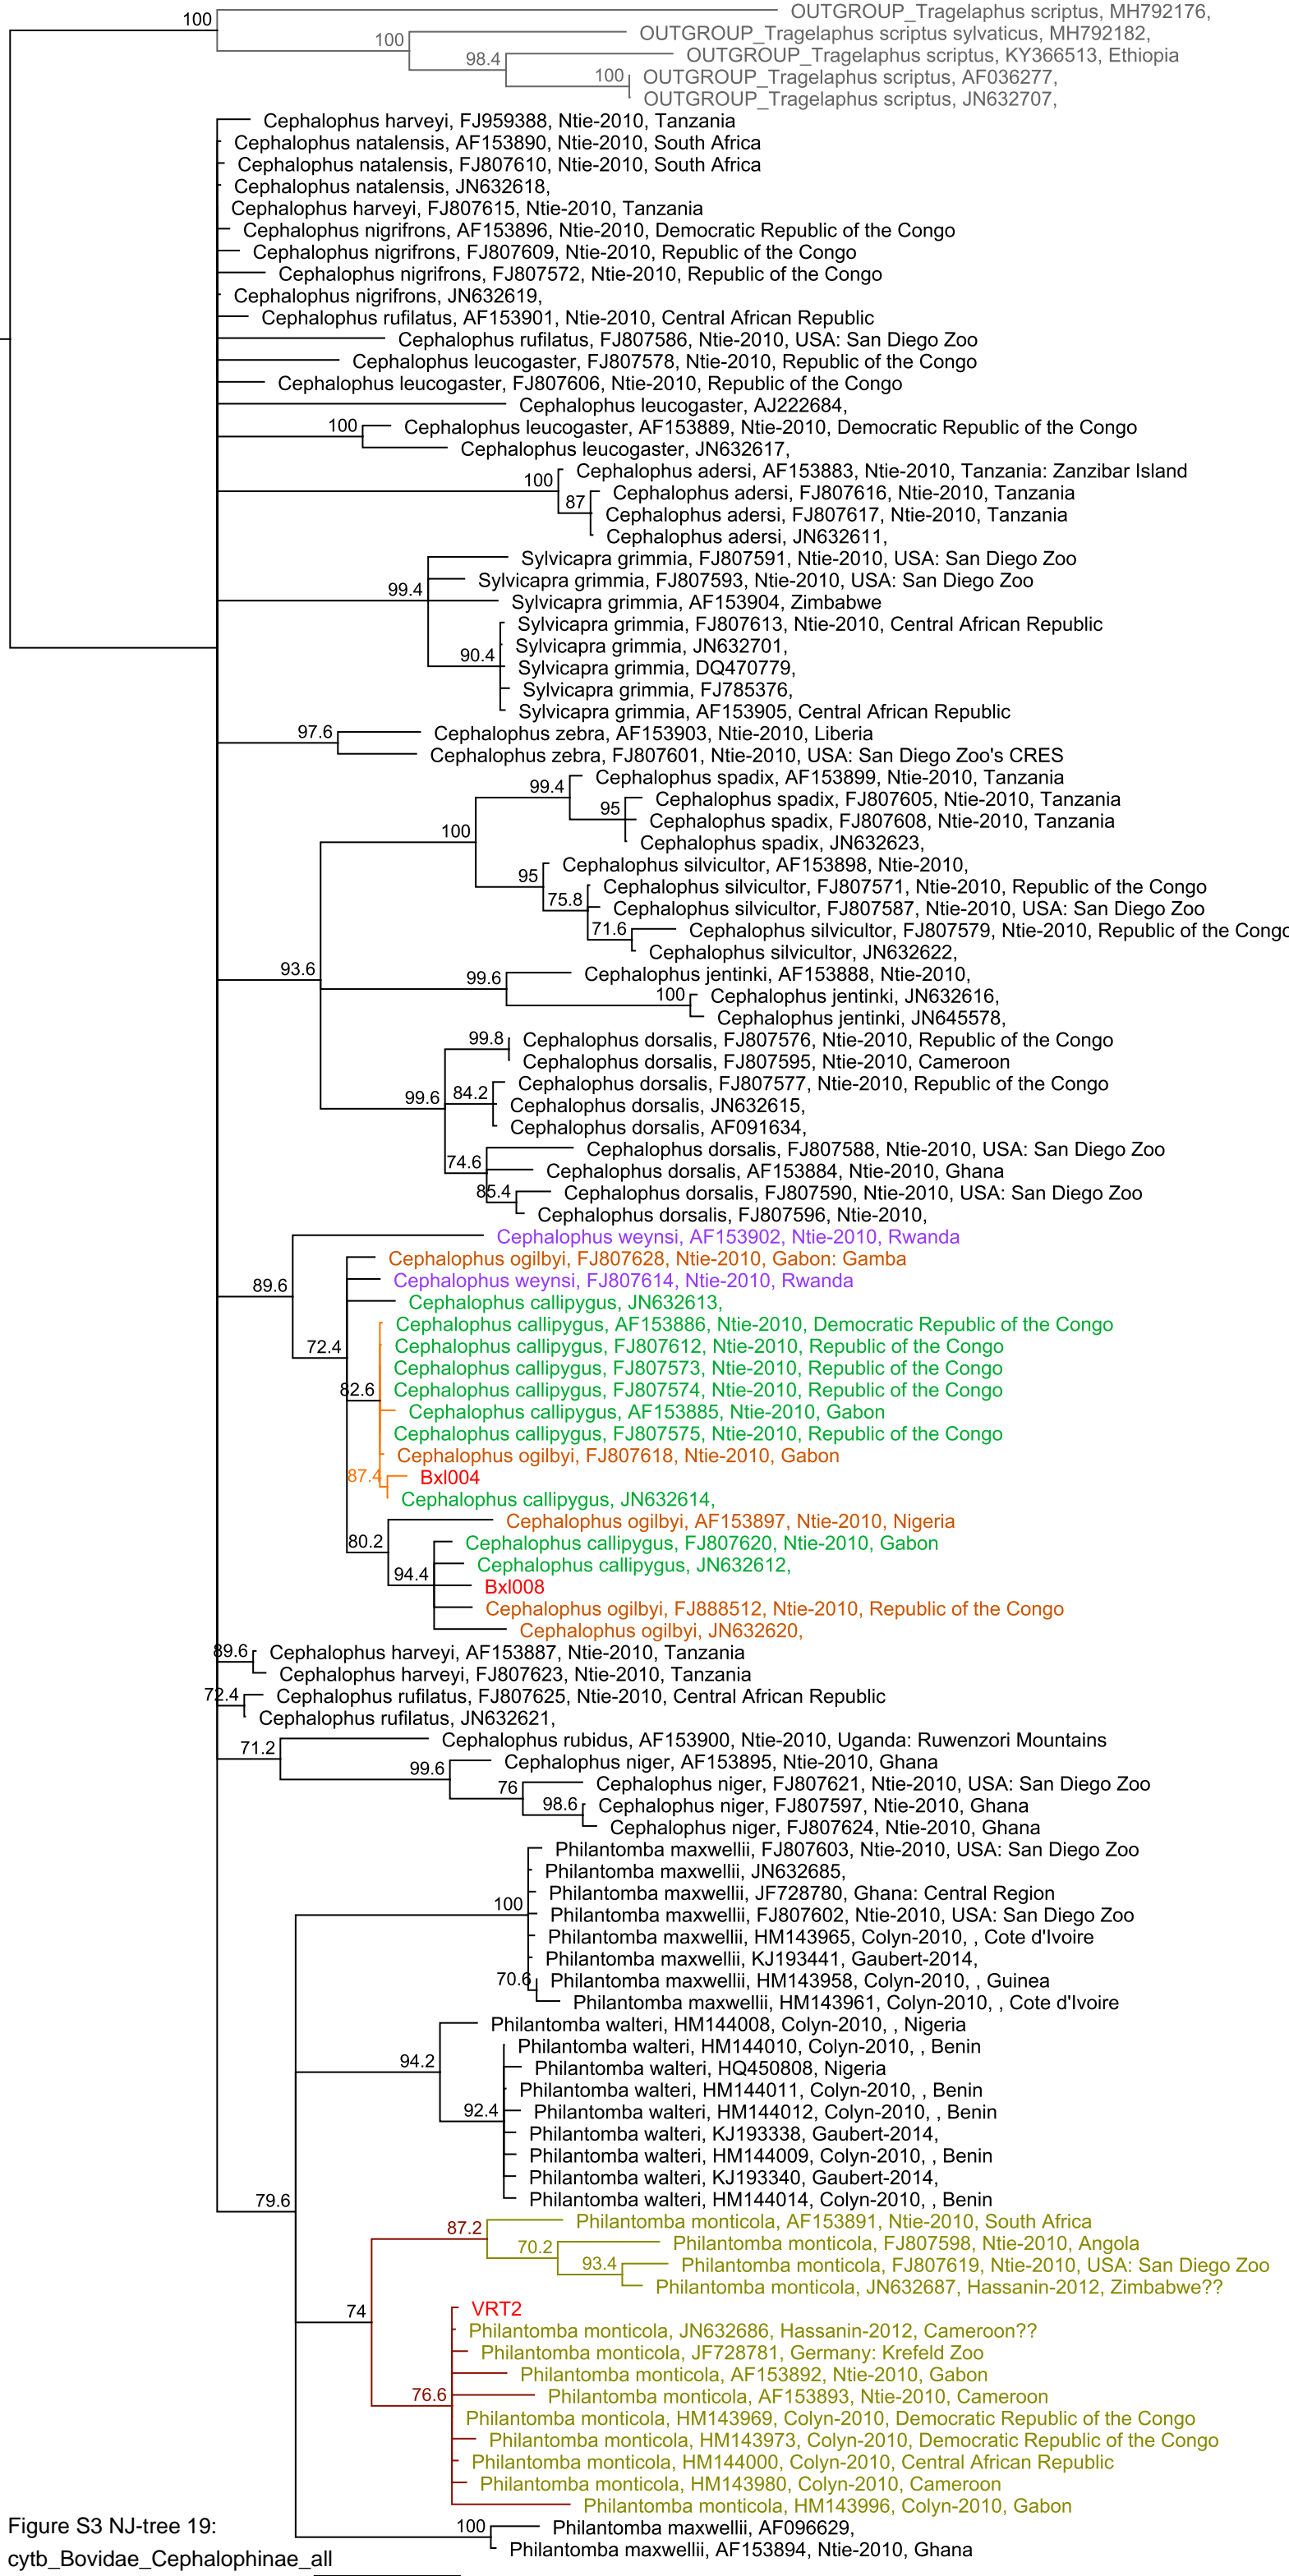

Figure S3 NJ-tree 19:  
cytb\_Bovidae\_Cephalophinae\_all

0.02

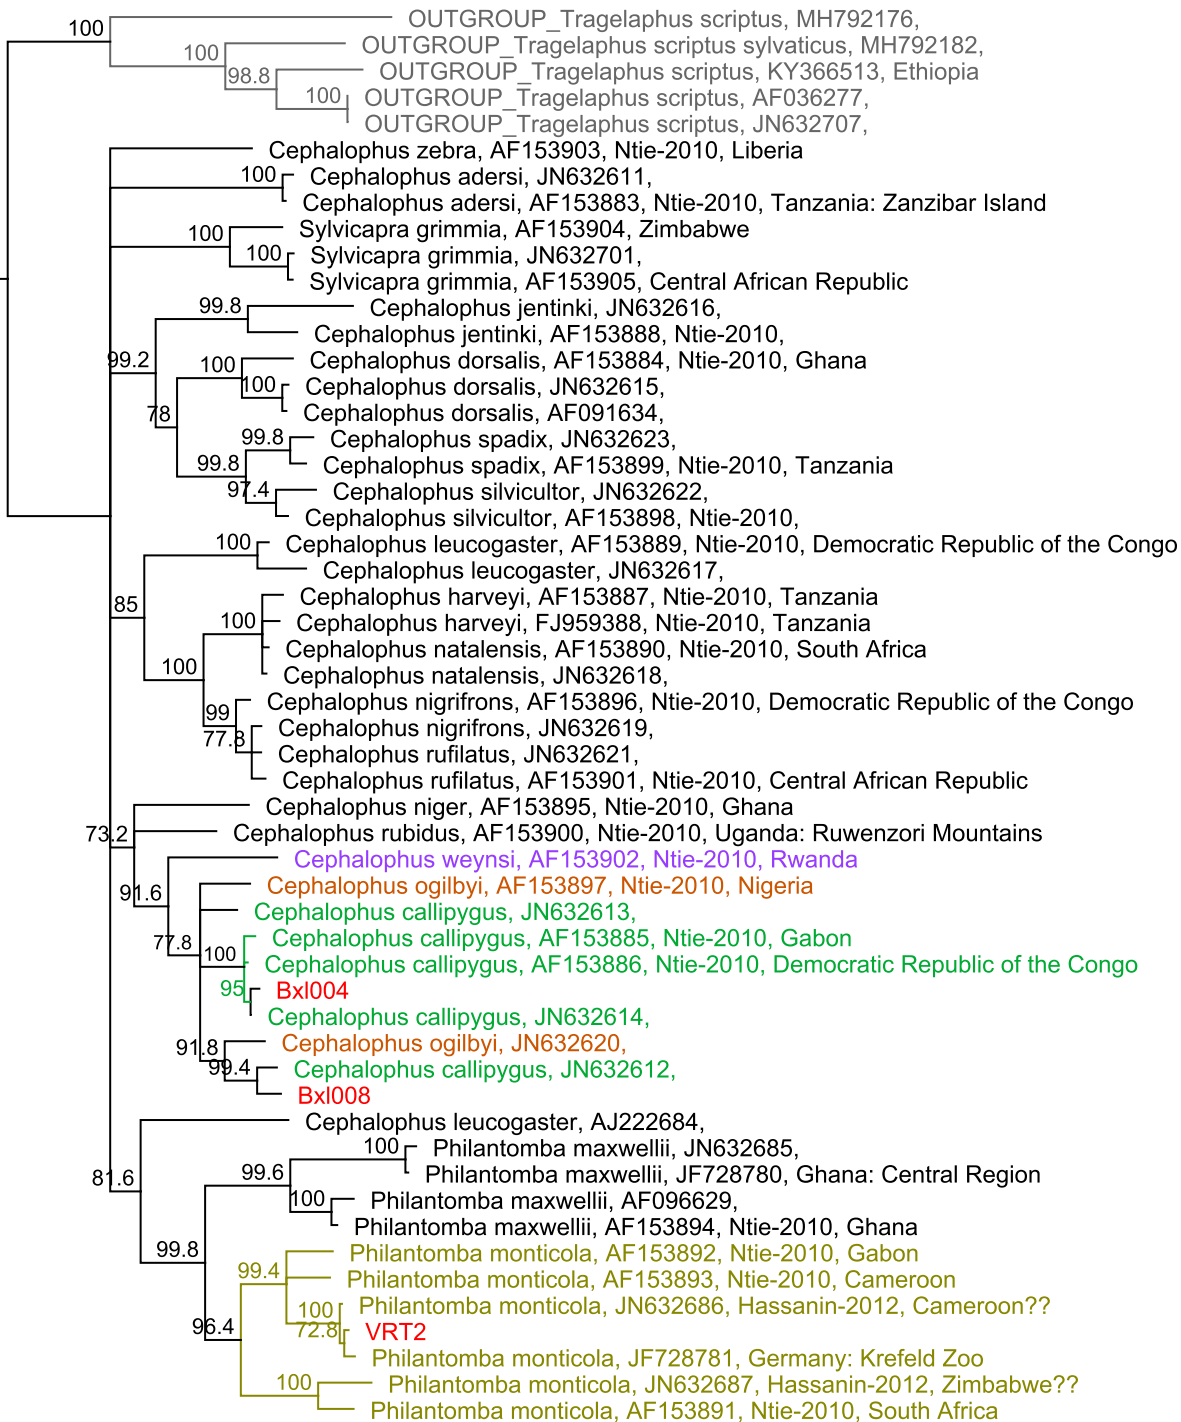

Figure S3 NJ-tree 20: cytb\_Bovidae\_Cephalophinae\_long



Figure S3 NJ-tree 20: cytb\_Bovidae\_Cephalophinae\_long

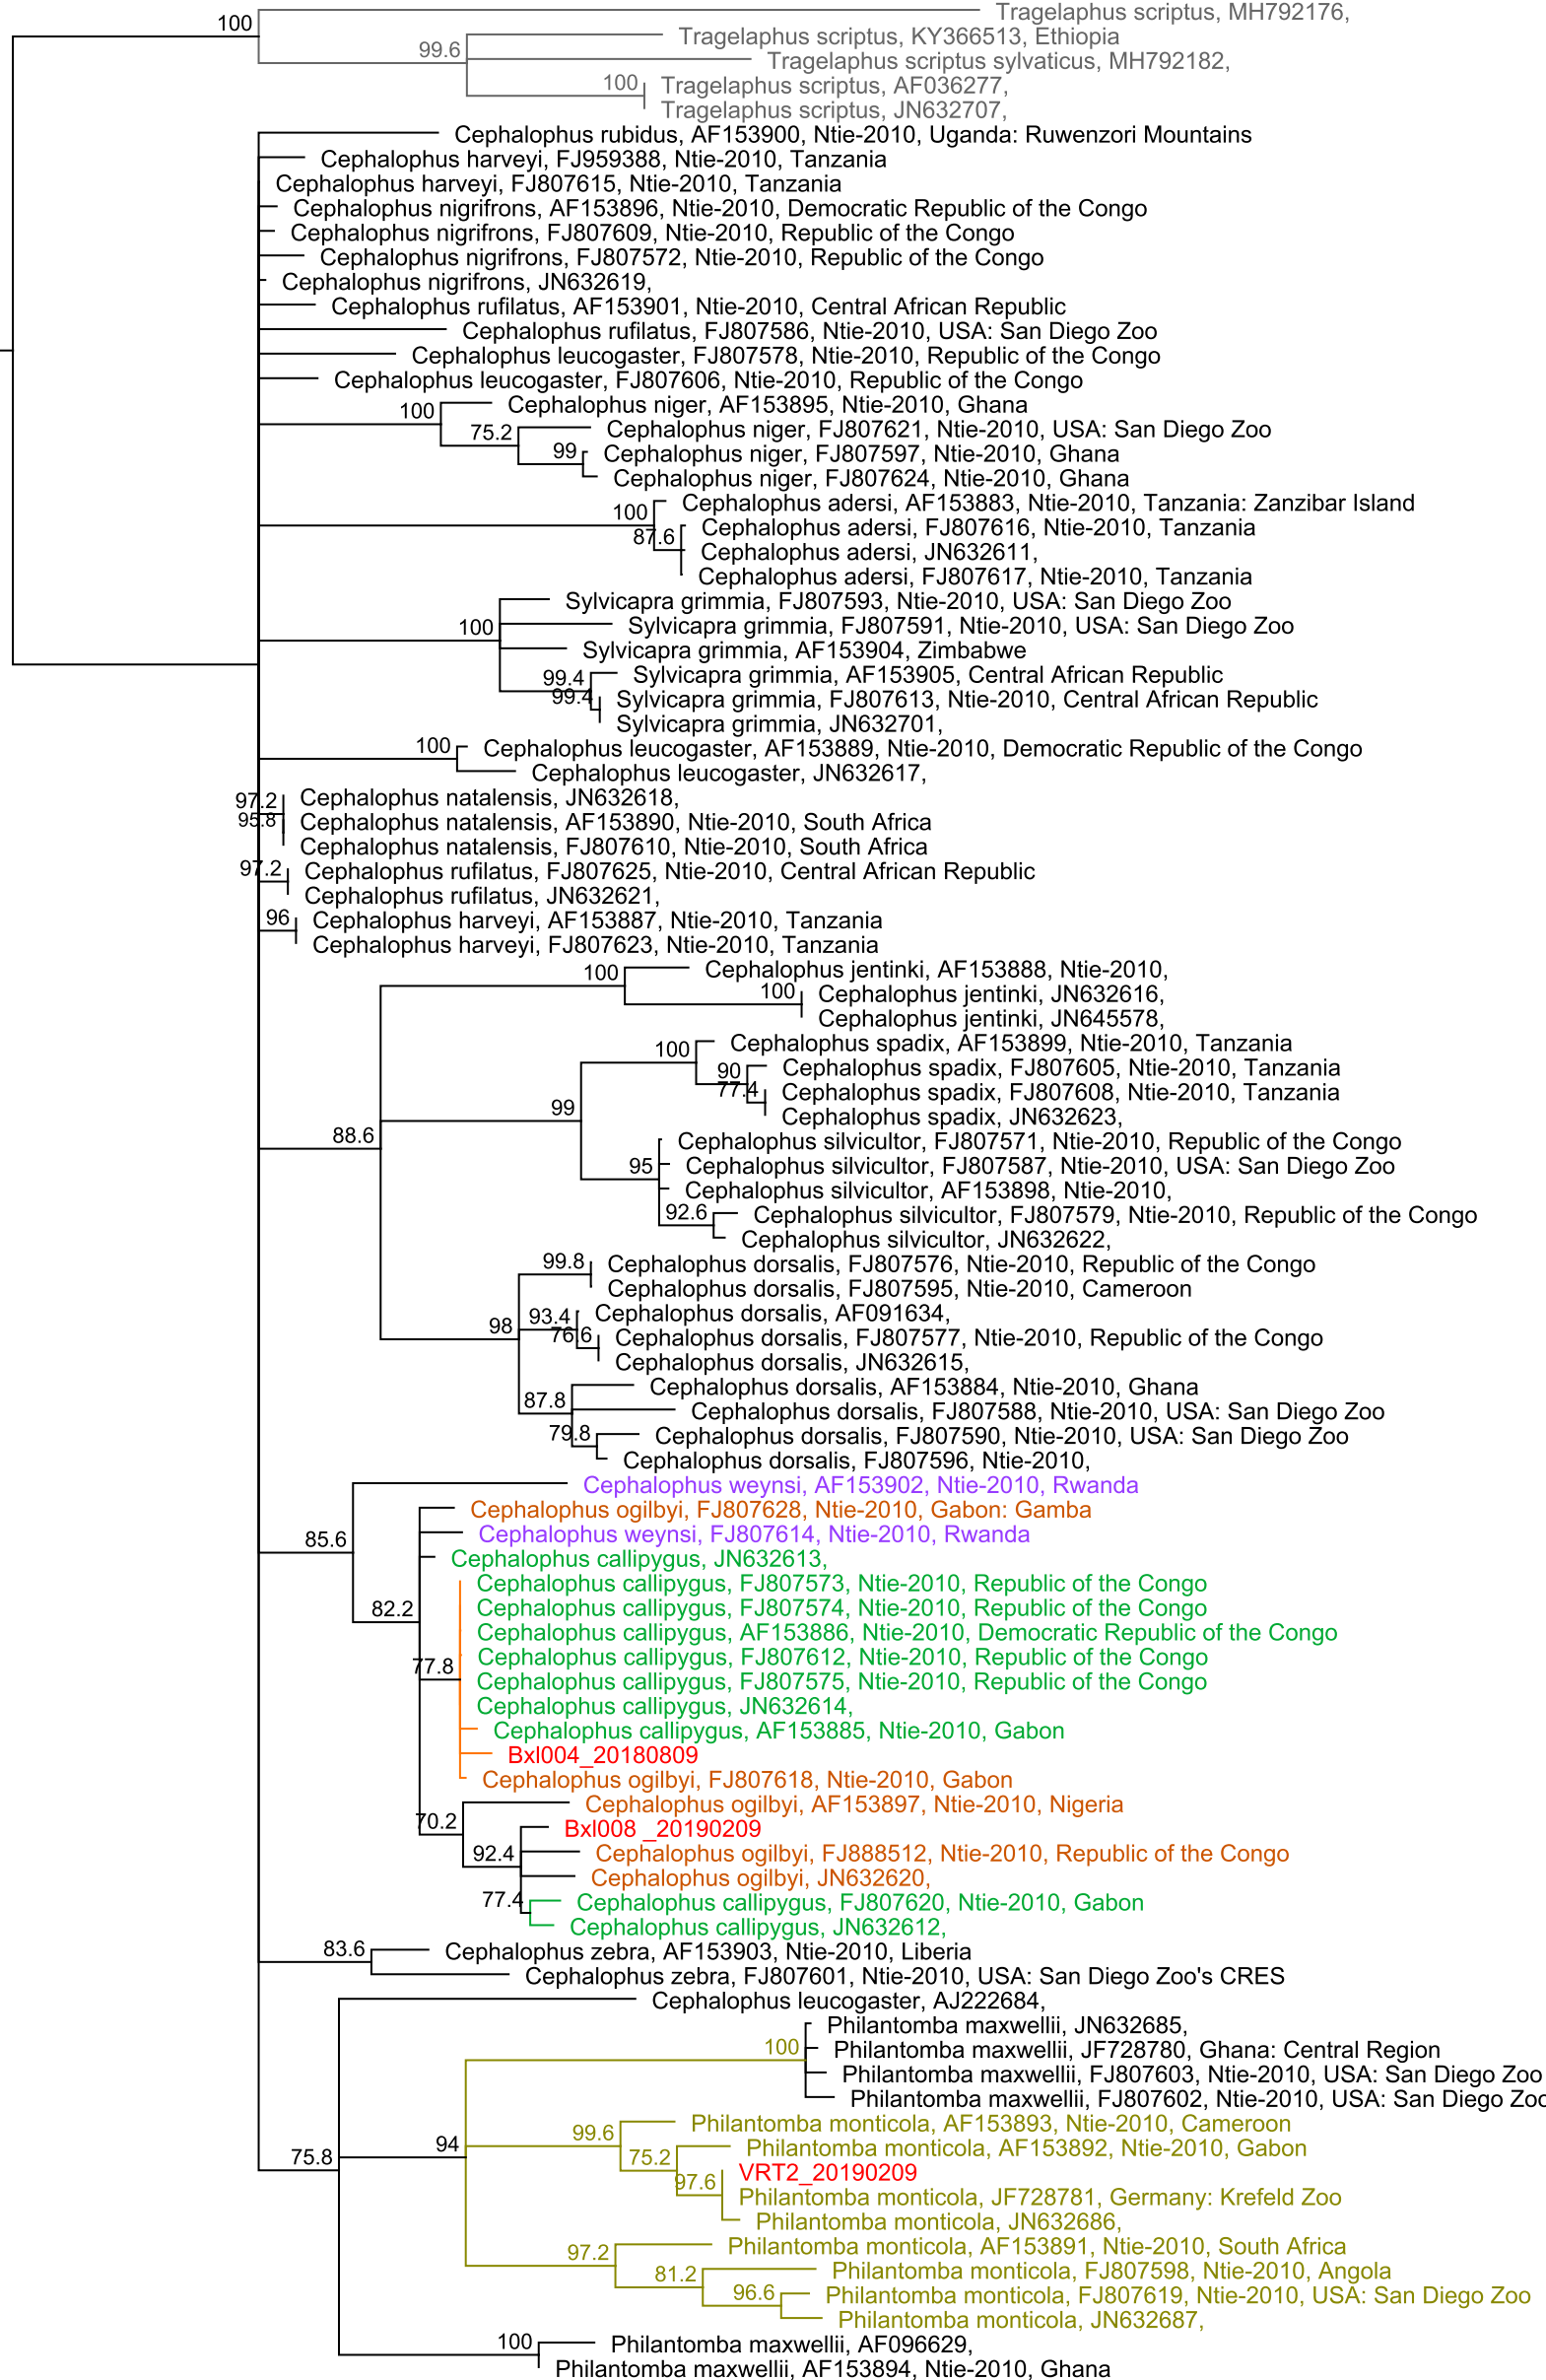

Figure S3 NJ-tree 21: cytb\_Bovidae\_Cephalophinae\_trimmed\_A

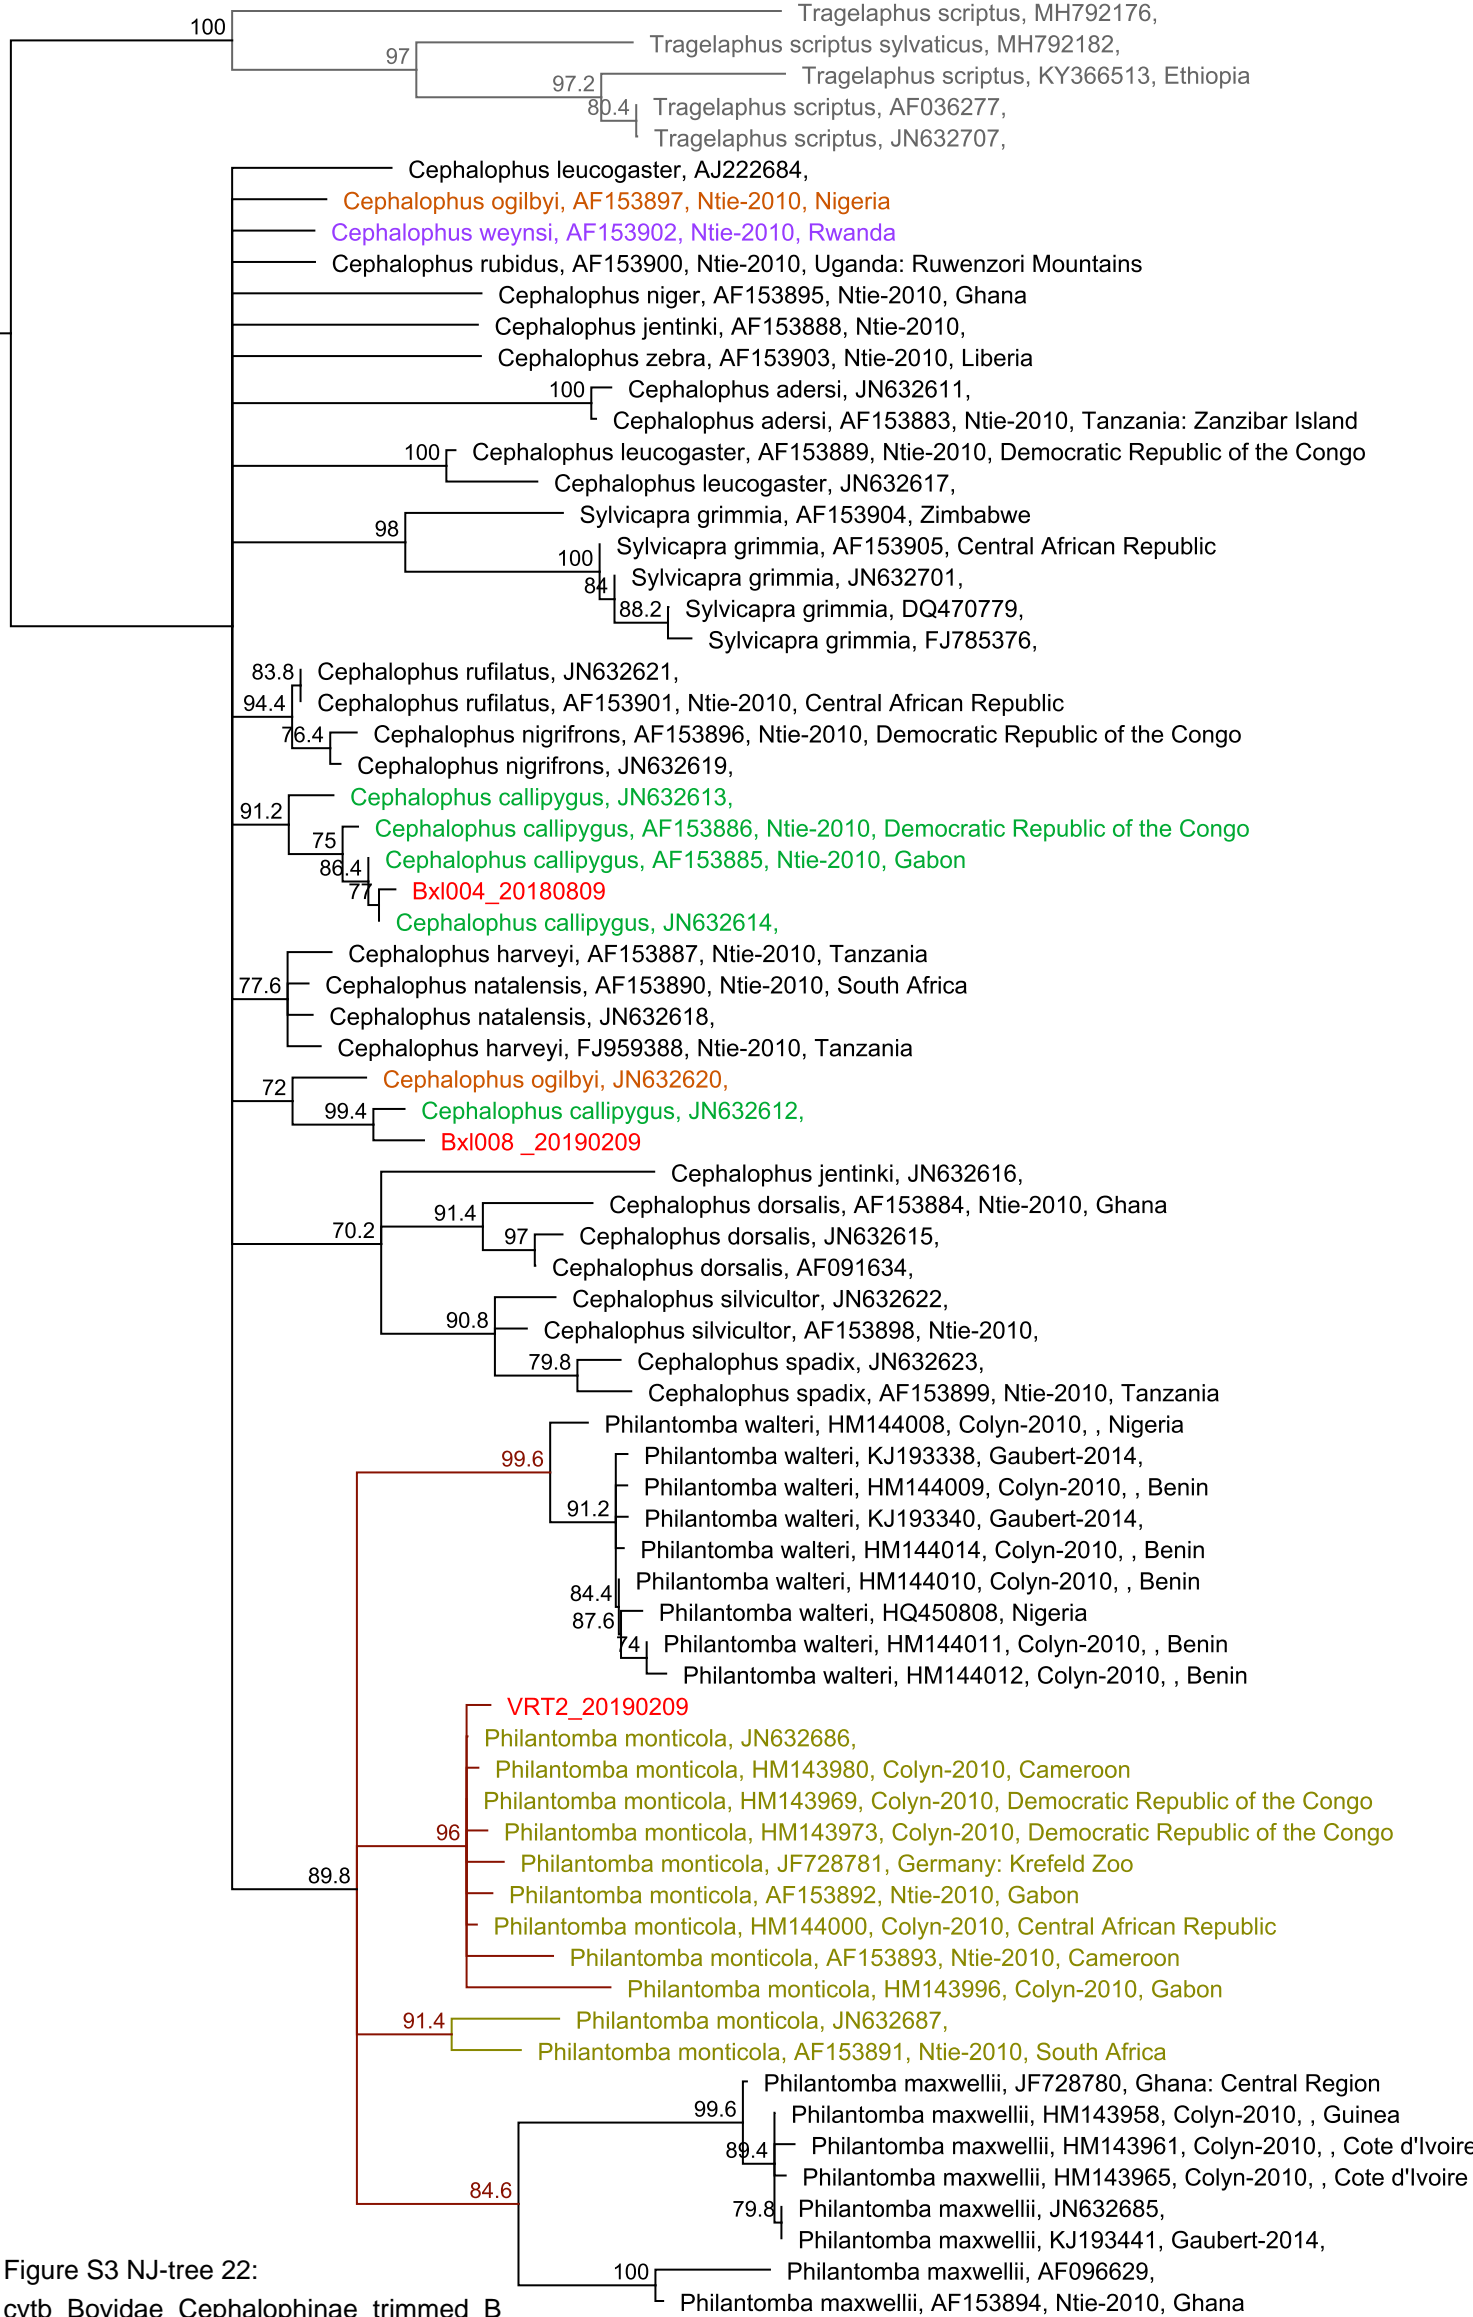

Figure S3 NJ-tree 22:  
cytb\_Bovidae\_Cephalophinae\_trimmed\_B

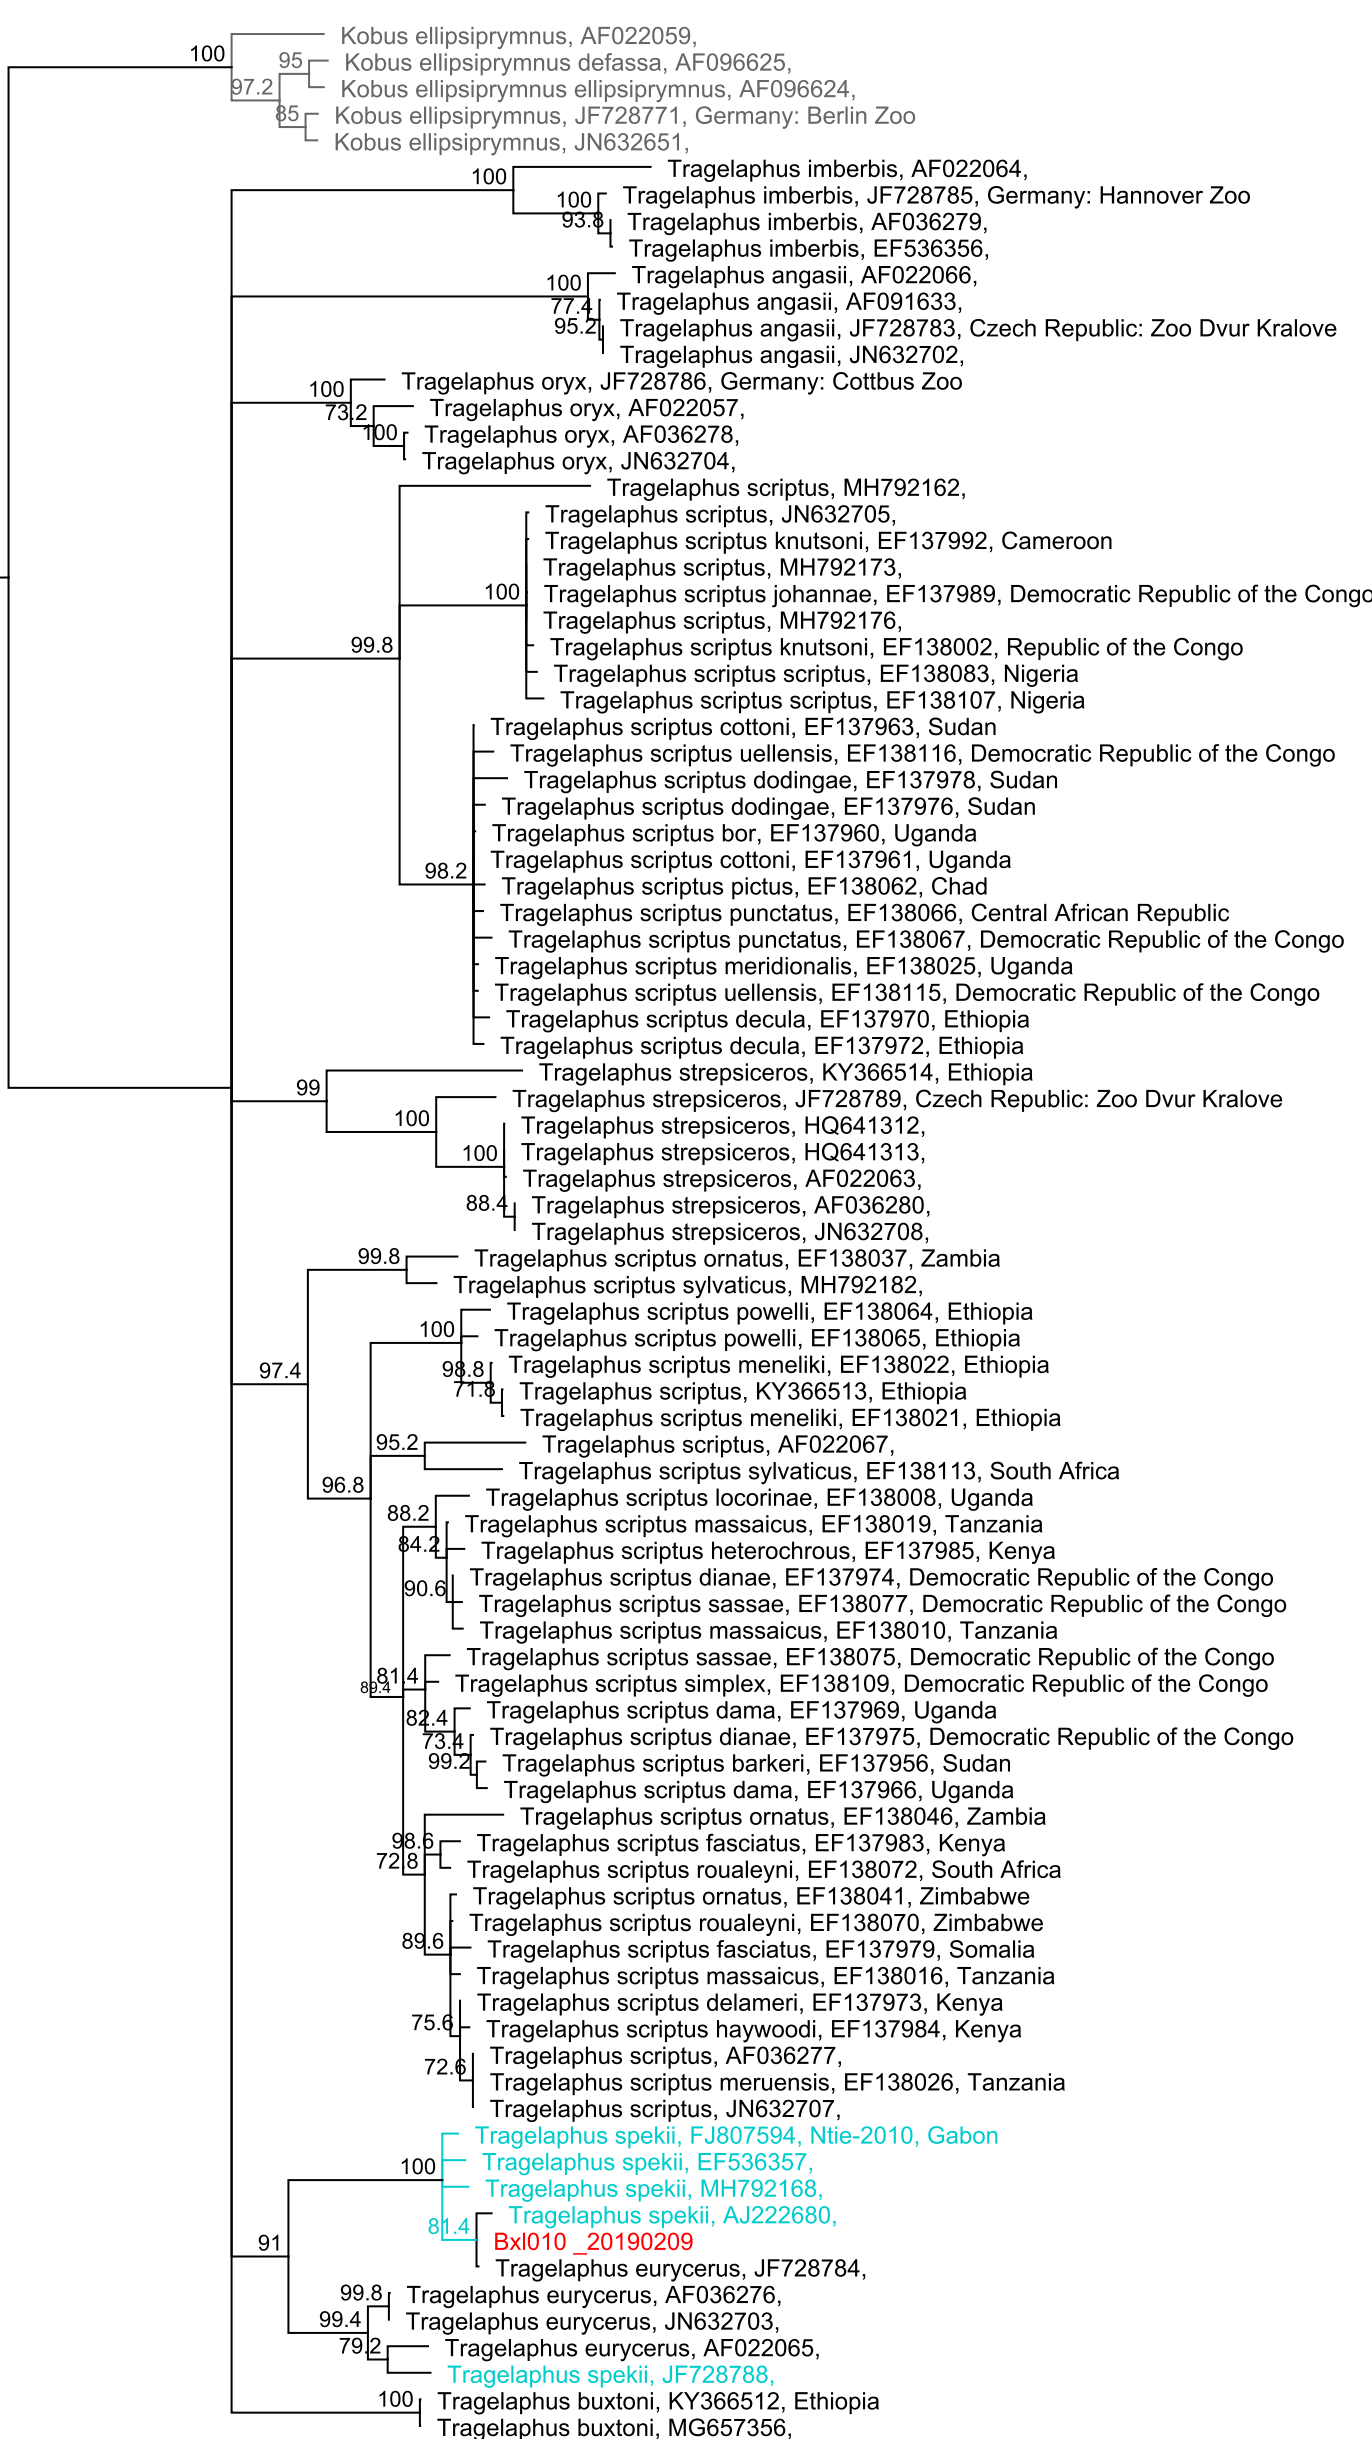

Figure S3 NJ-tree 23: cytb\_Bovidae\_Tragelaphus\_all

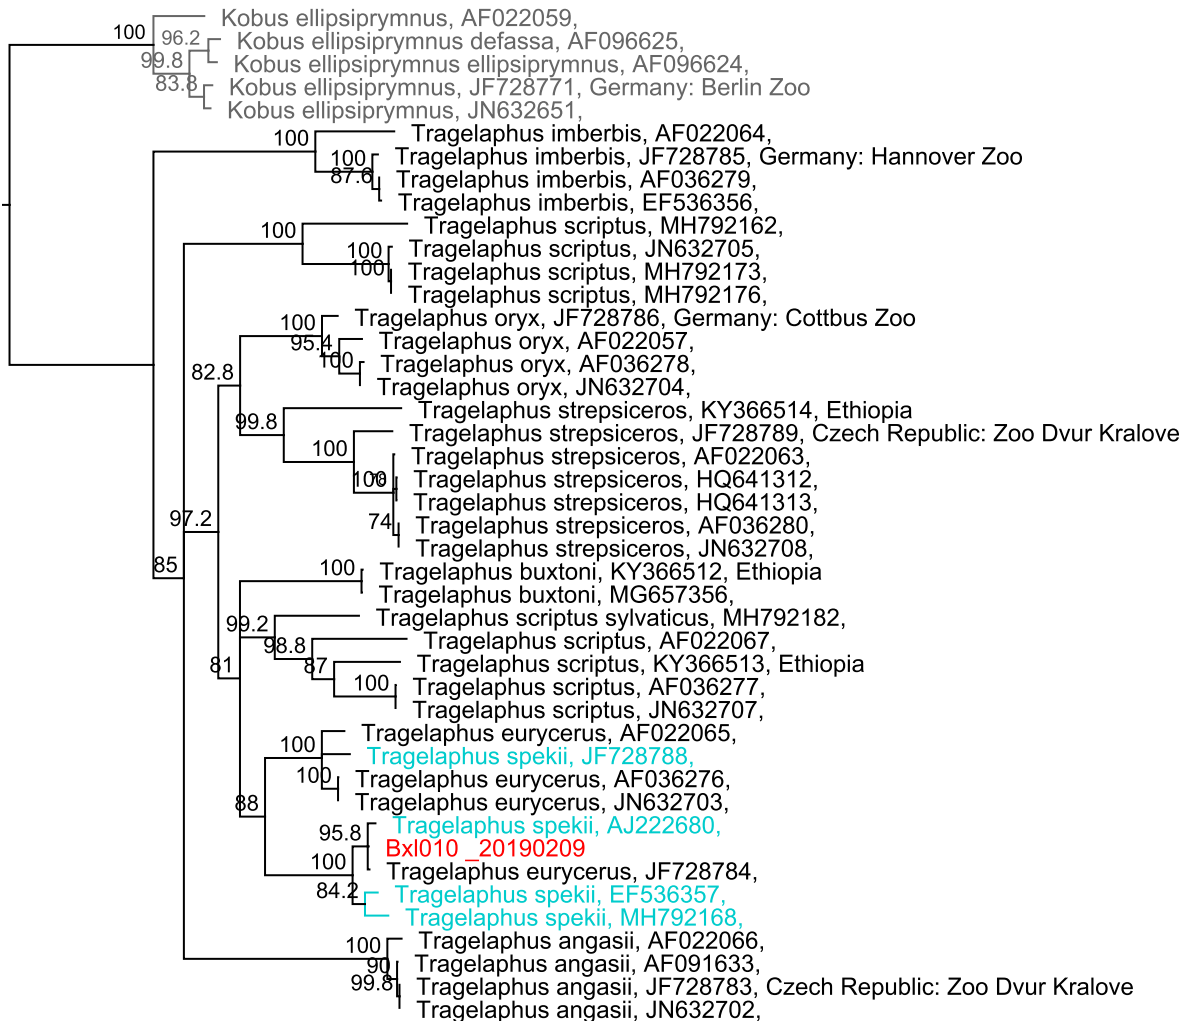

Figure S3 NJ-tree 24: cytb\_Bovidae\_Tragelaphus\_long

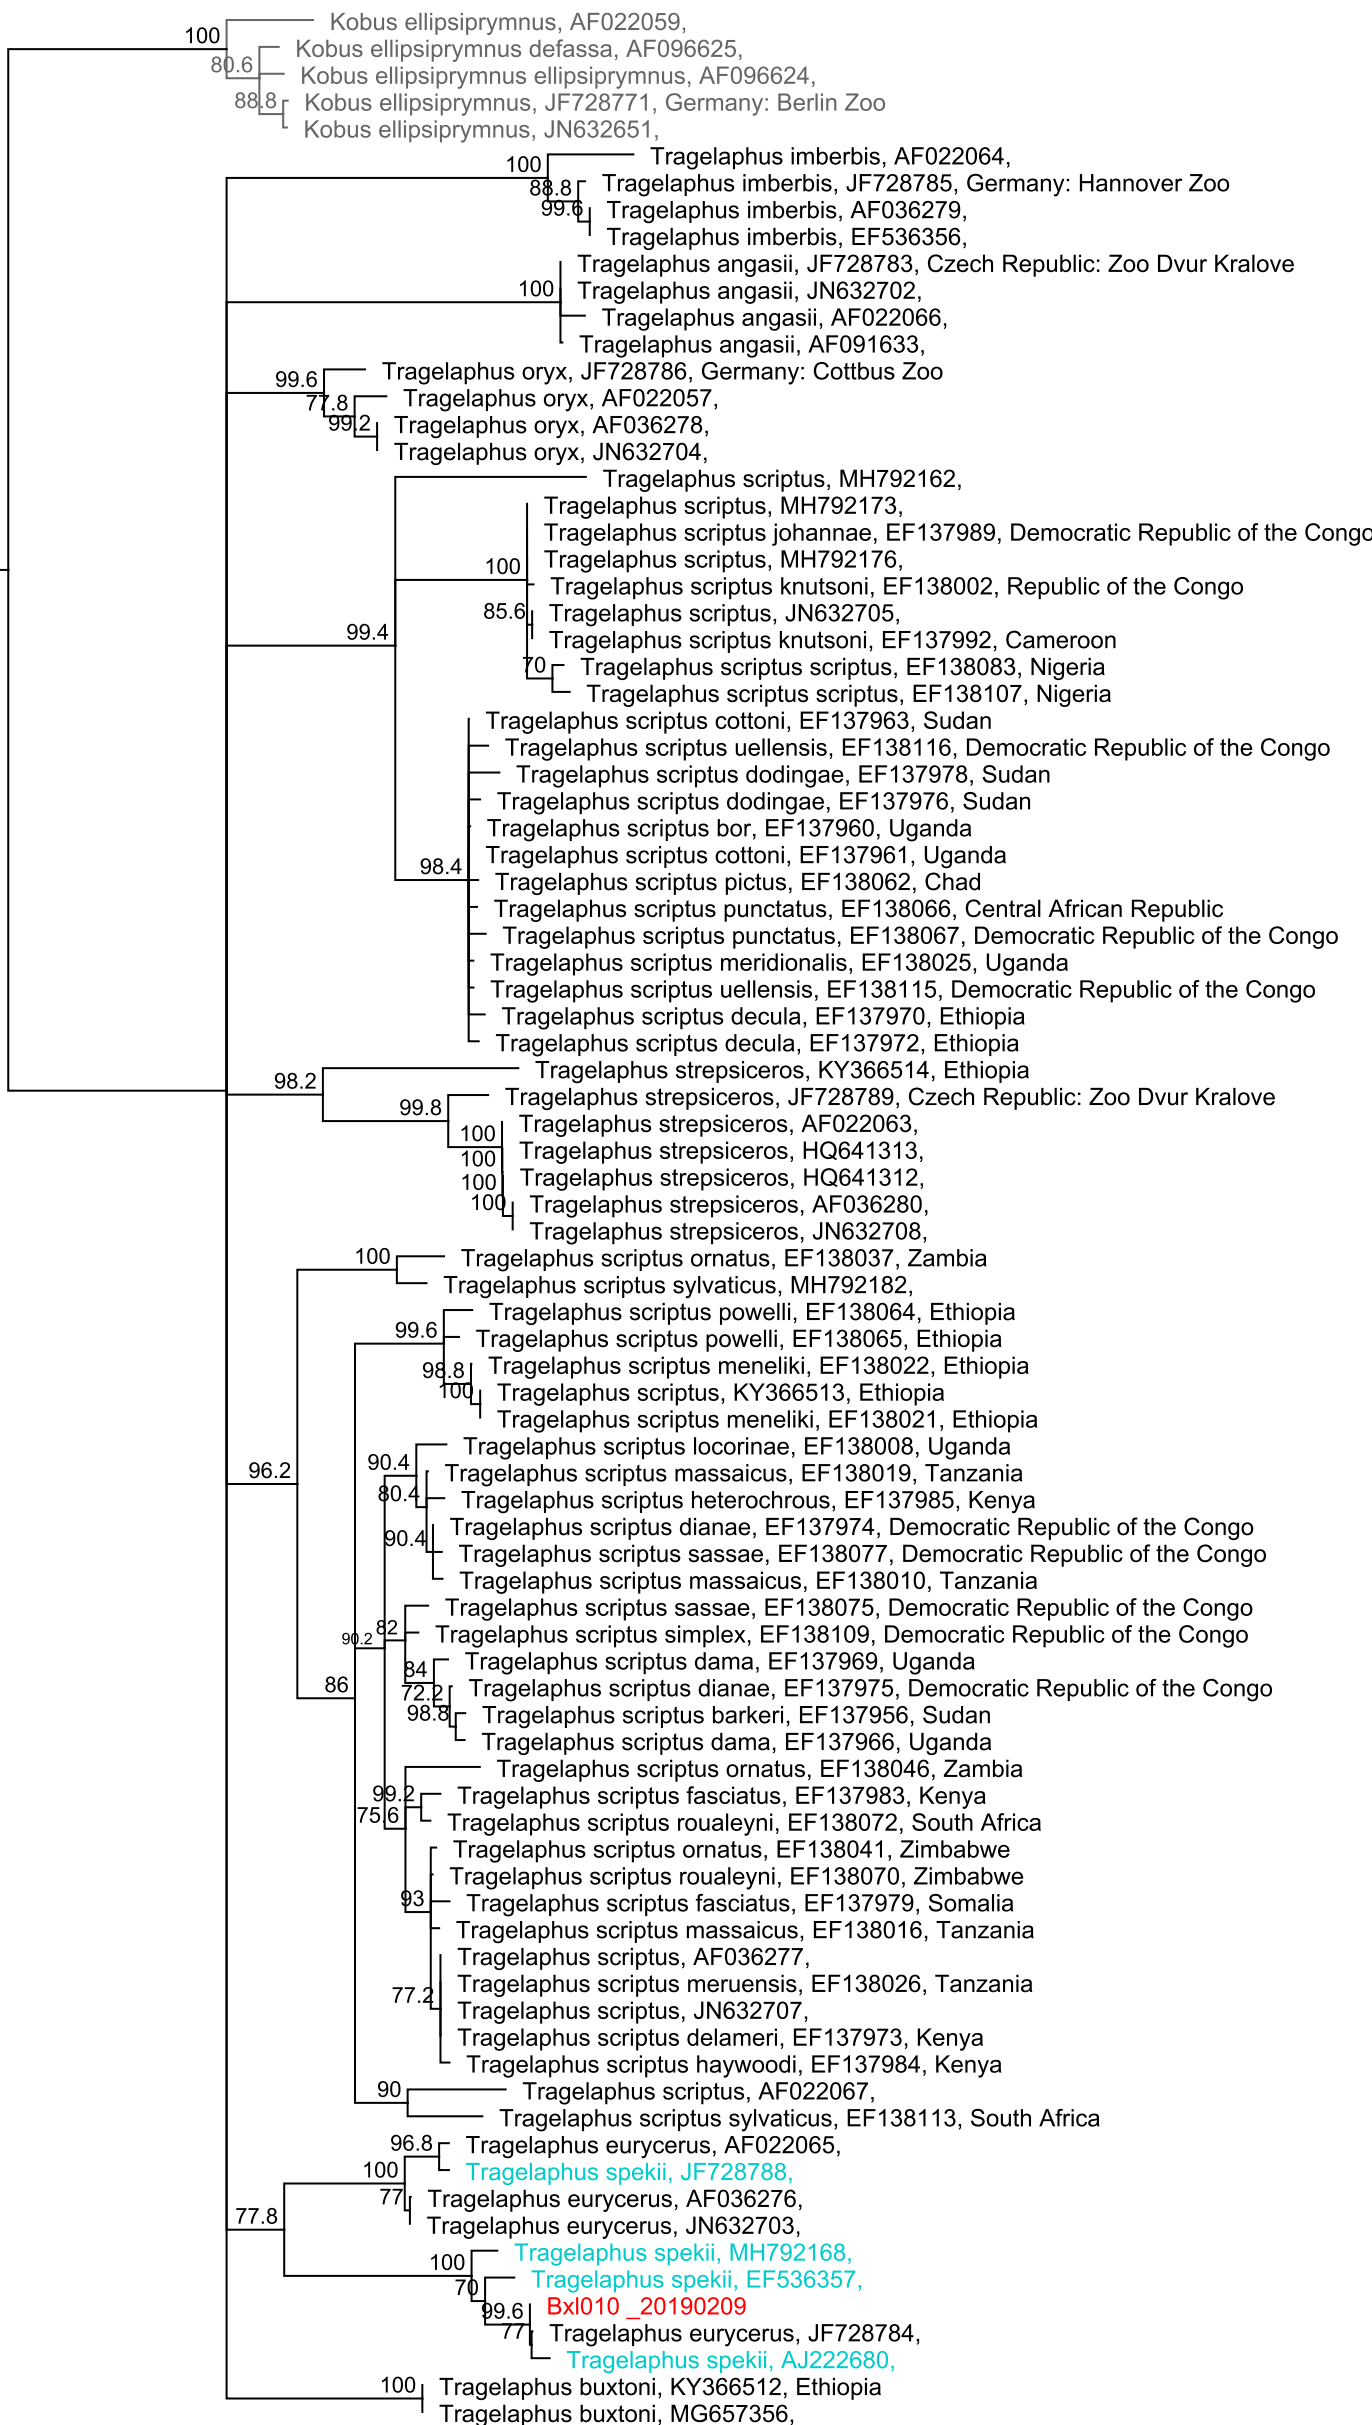

0.03

Figure S3 NJ-tree 25: cytb\_Bovidae\_Trachelaphus\_trimmed

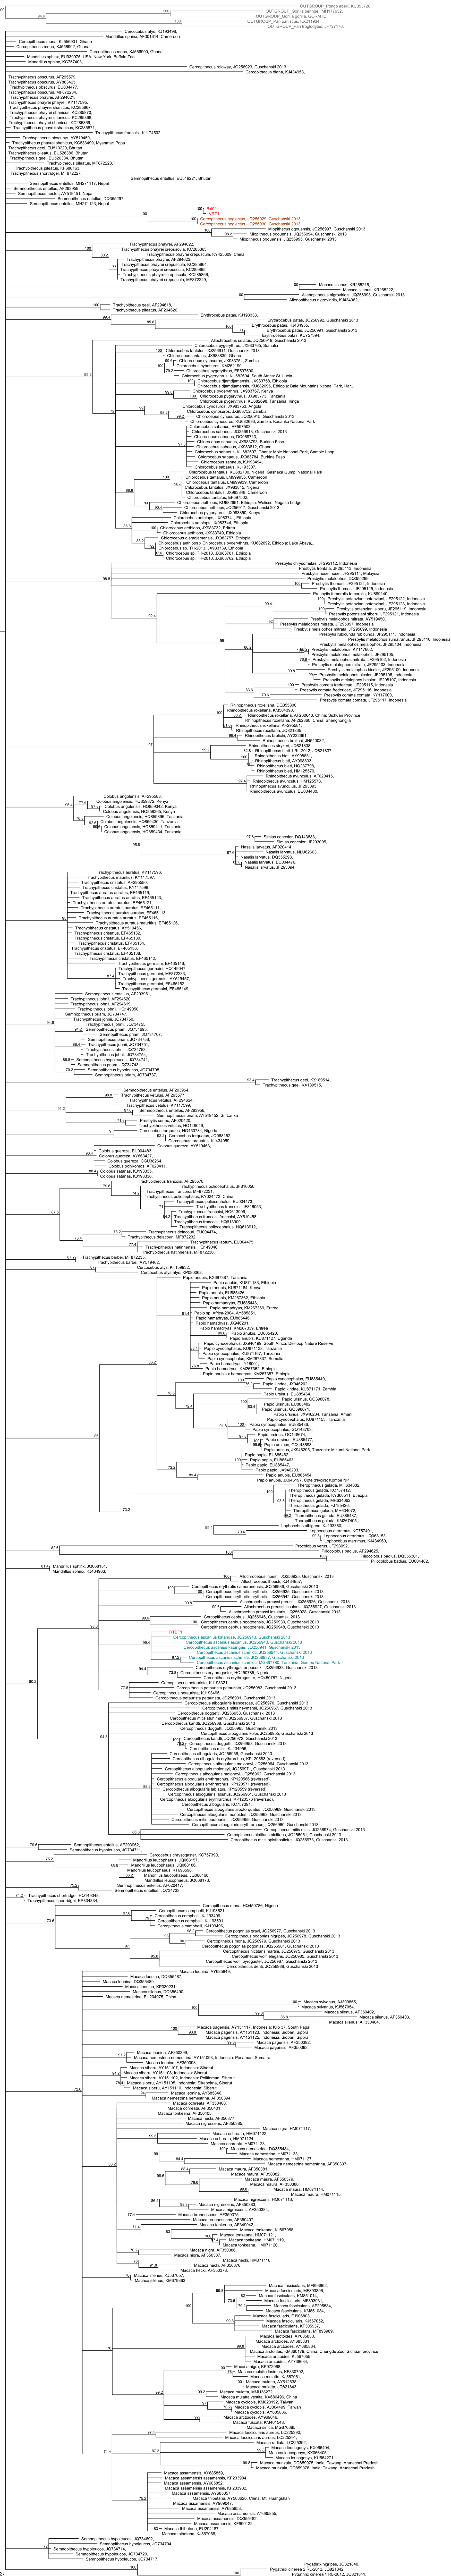

Figure S3 N-I-tree 26:

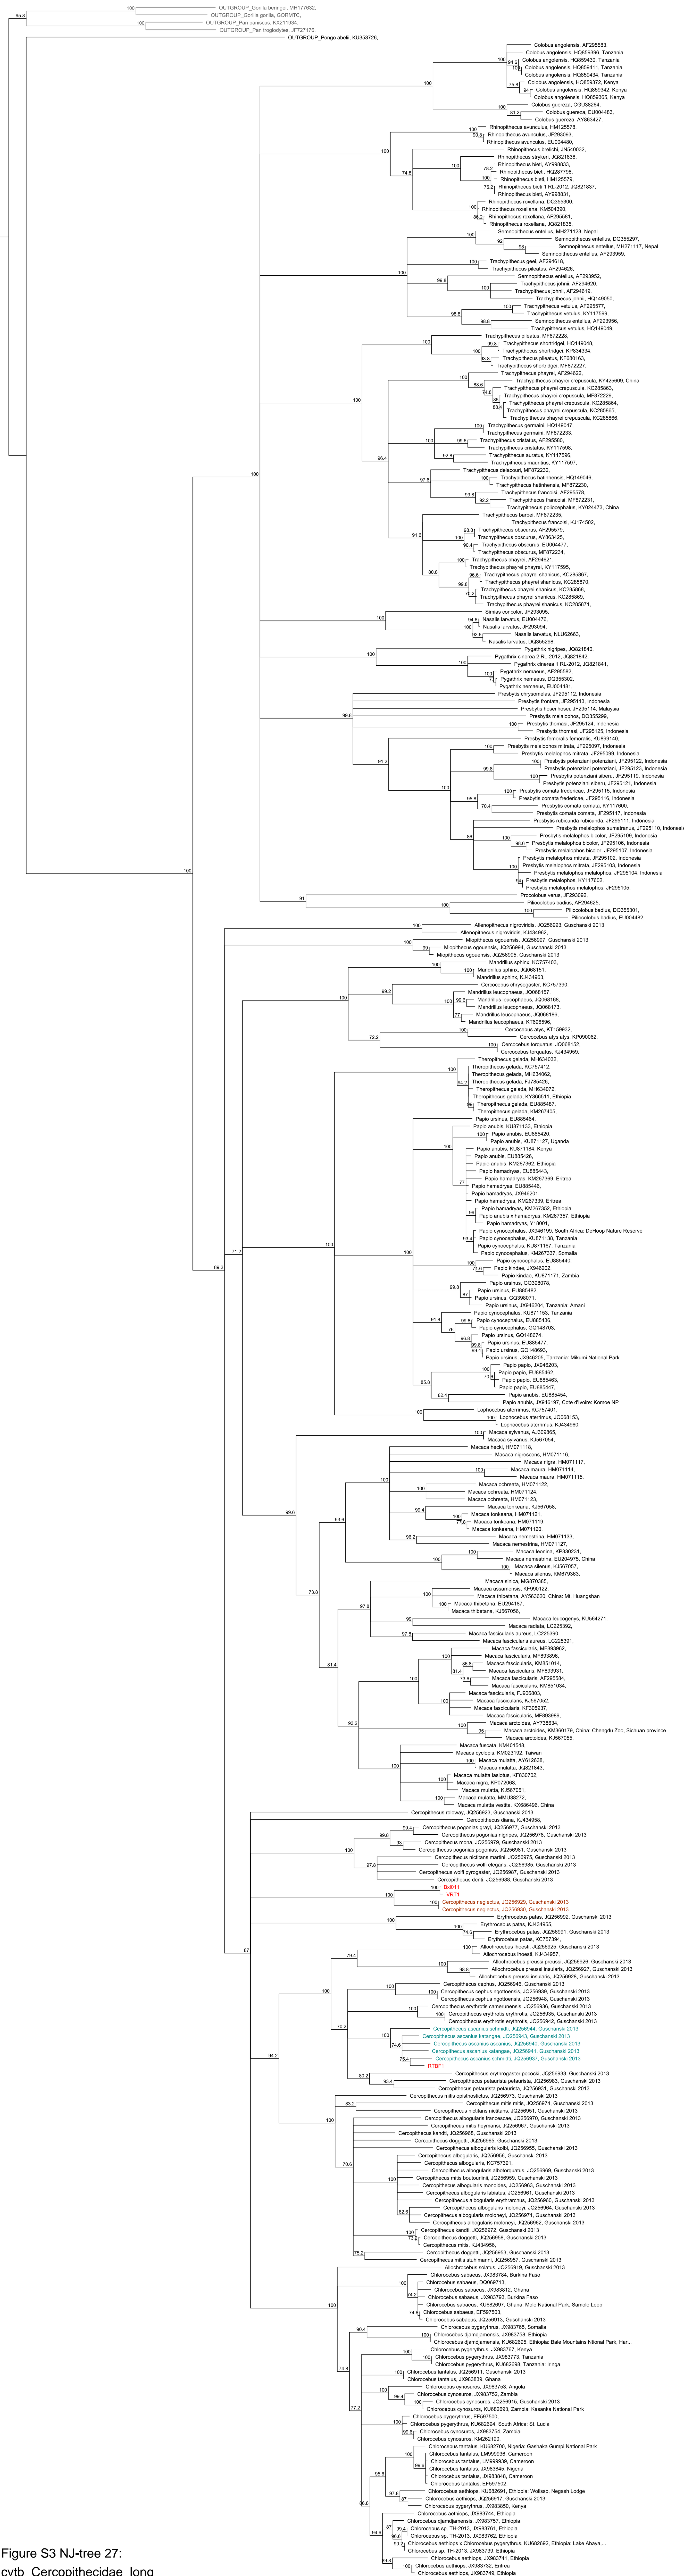

Figure S3 NJ-tree 27:  
cytb\_Cercopithecidae\_long

0.03



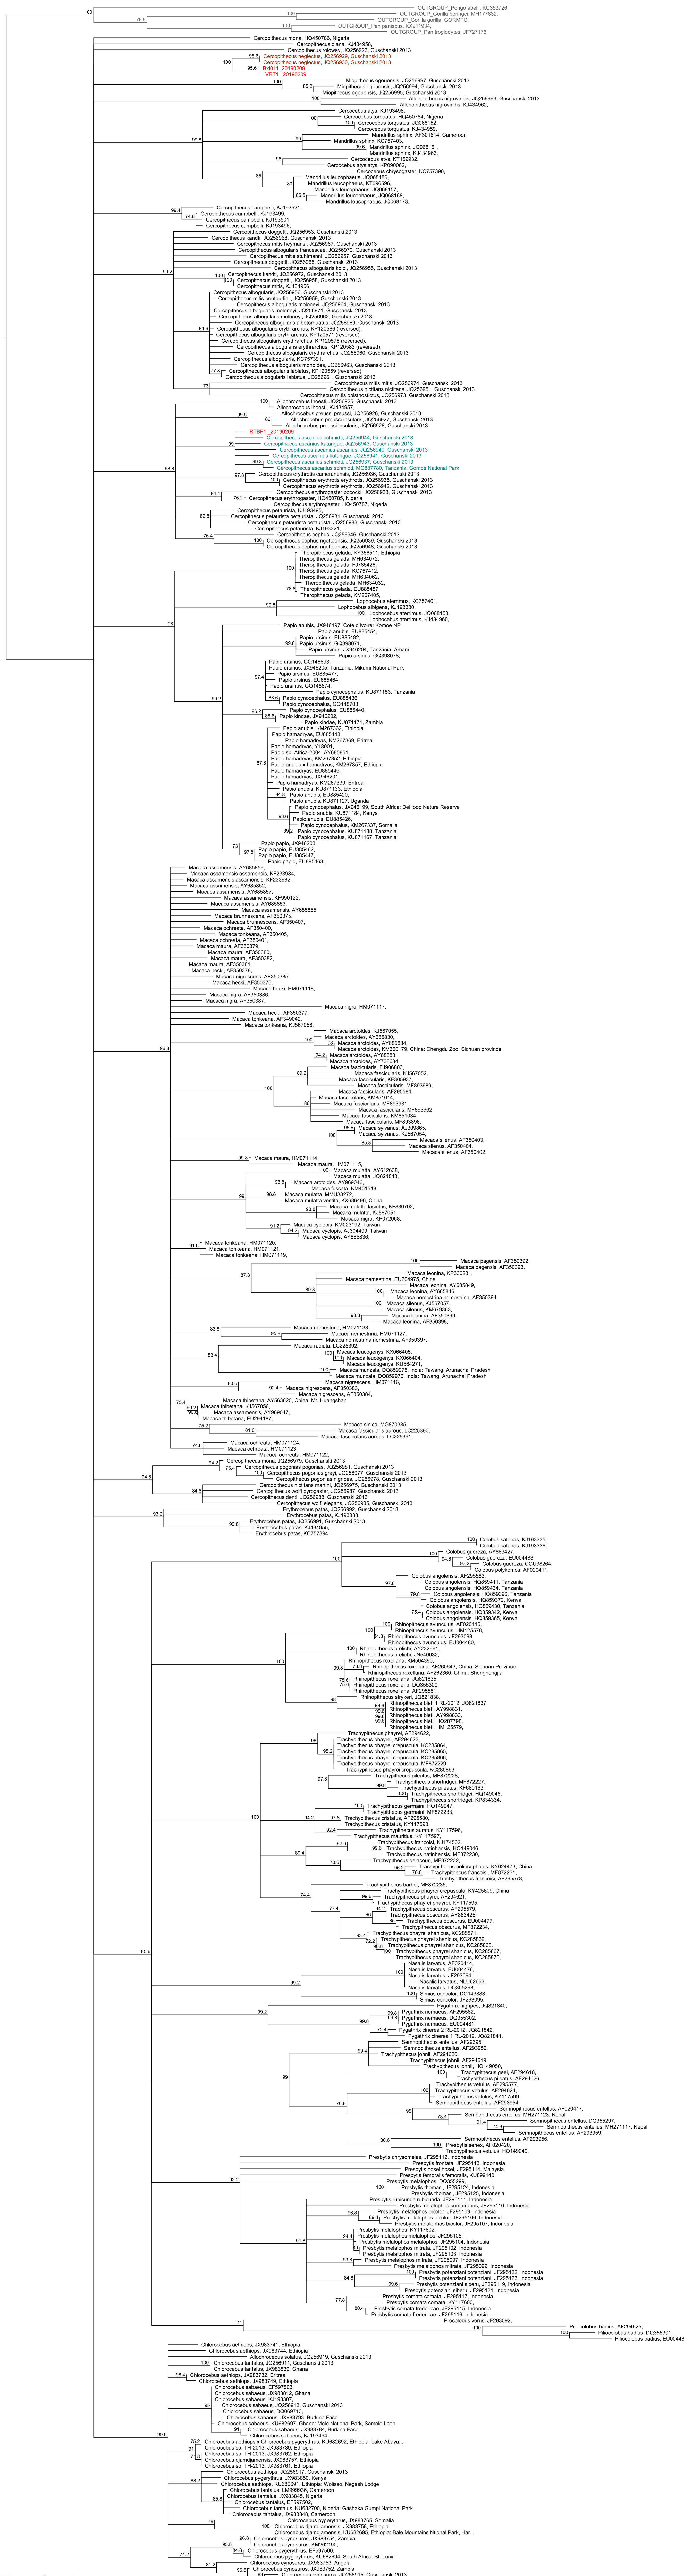

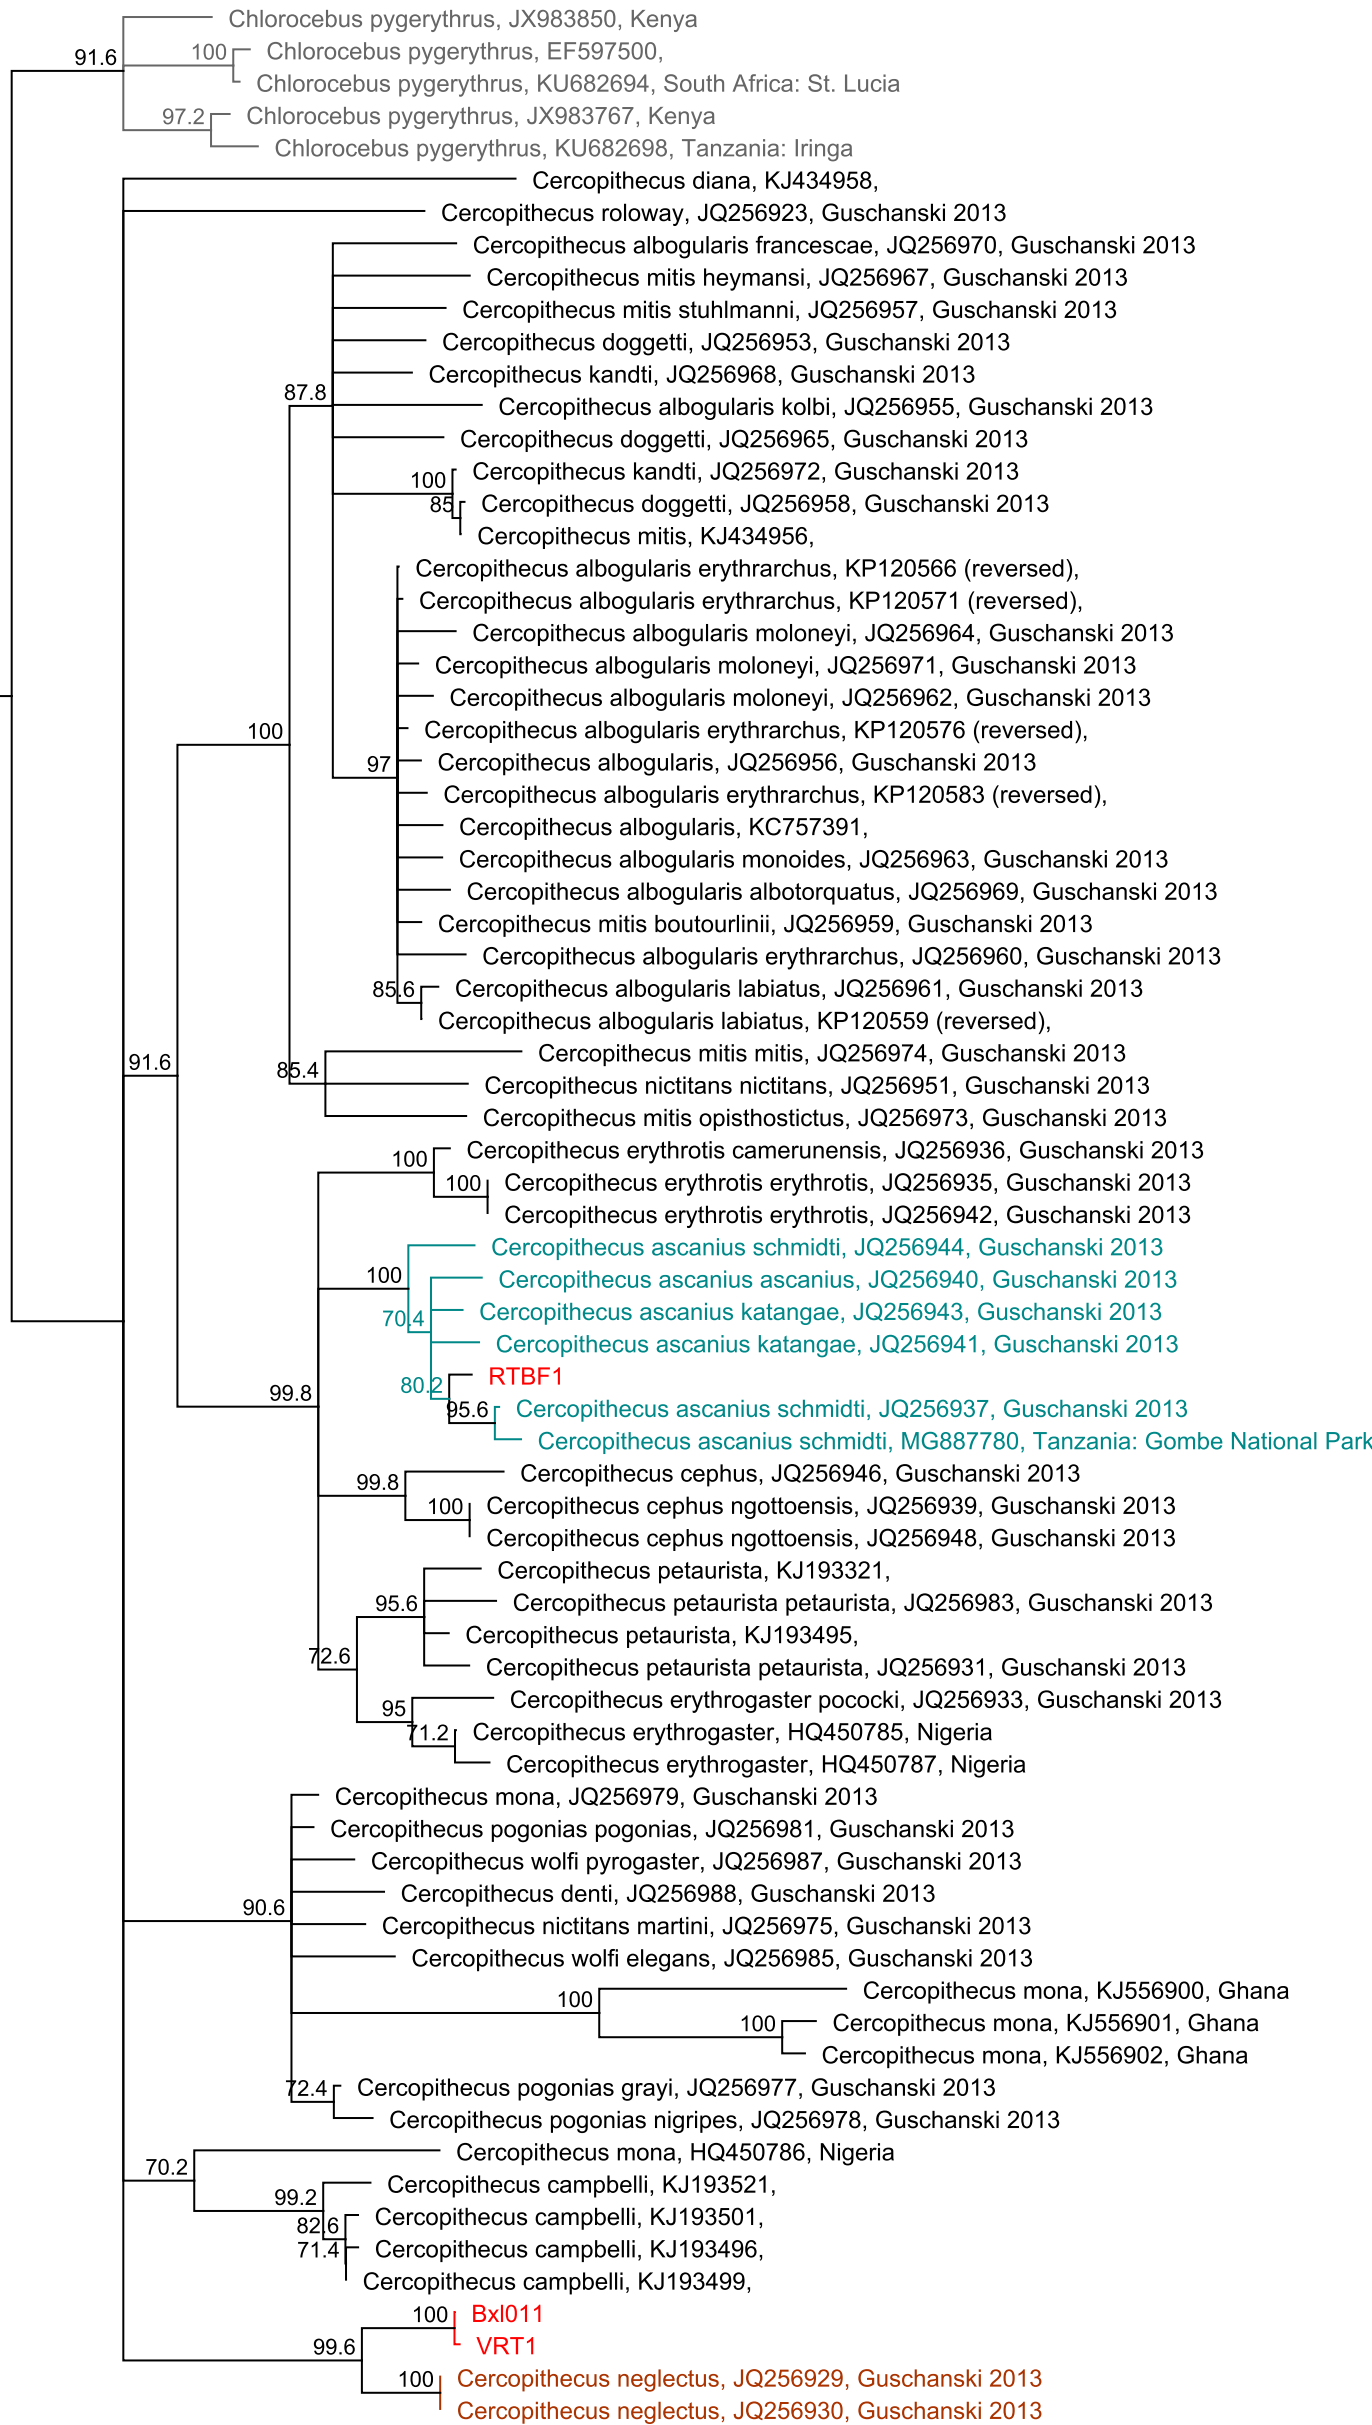

0.03

Figure S3 NJ-tree 30: cytb\_Cercopithecidae\_Cercopithecus\_all

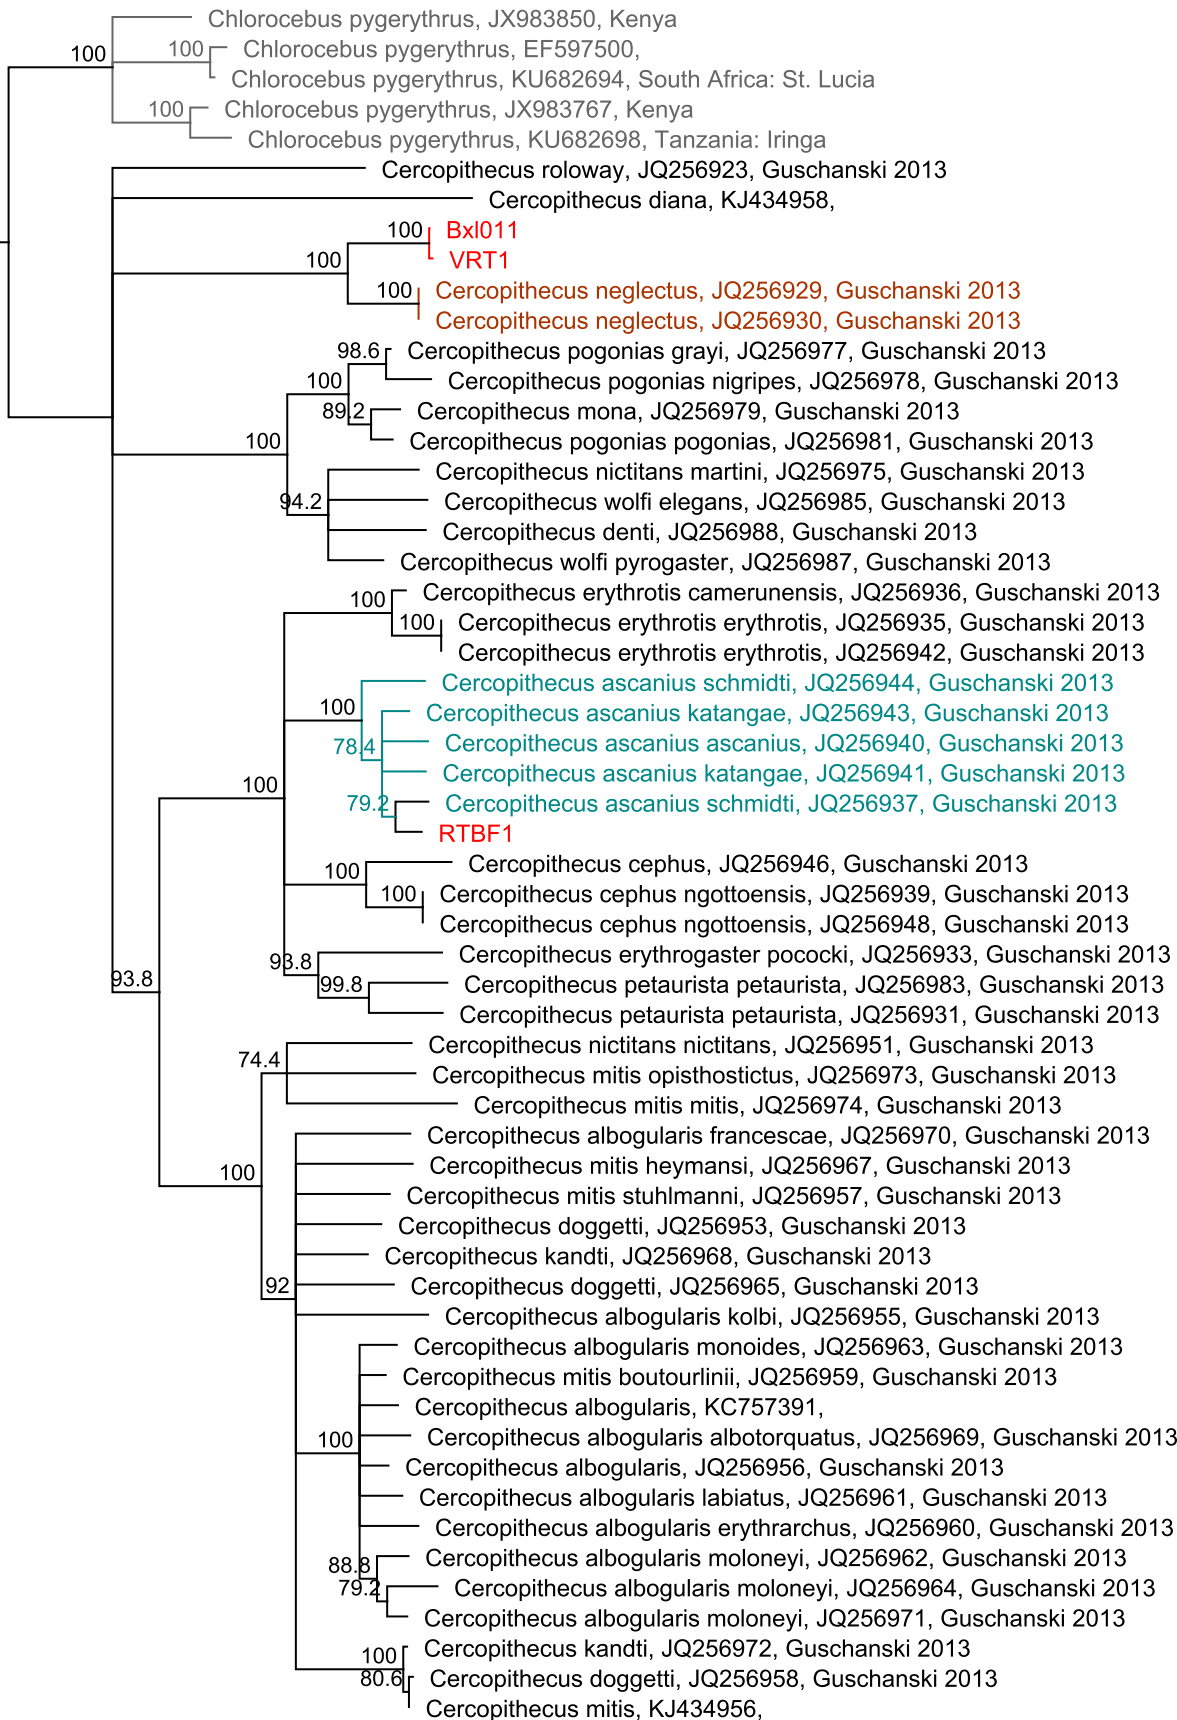

Figure S3 NJ-tree 31: cytb\_Cercopithecidae\_Cercopithecus\_long

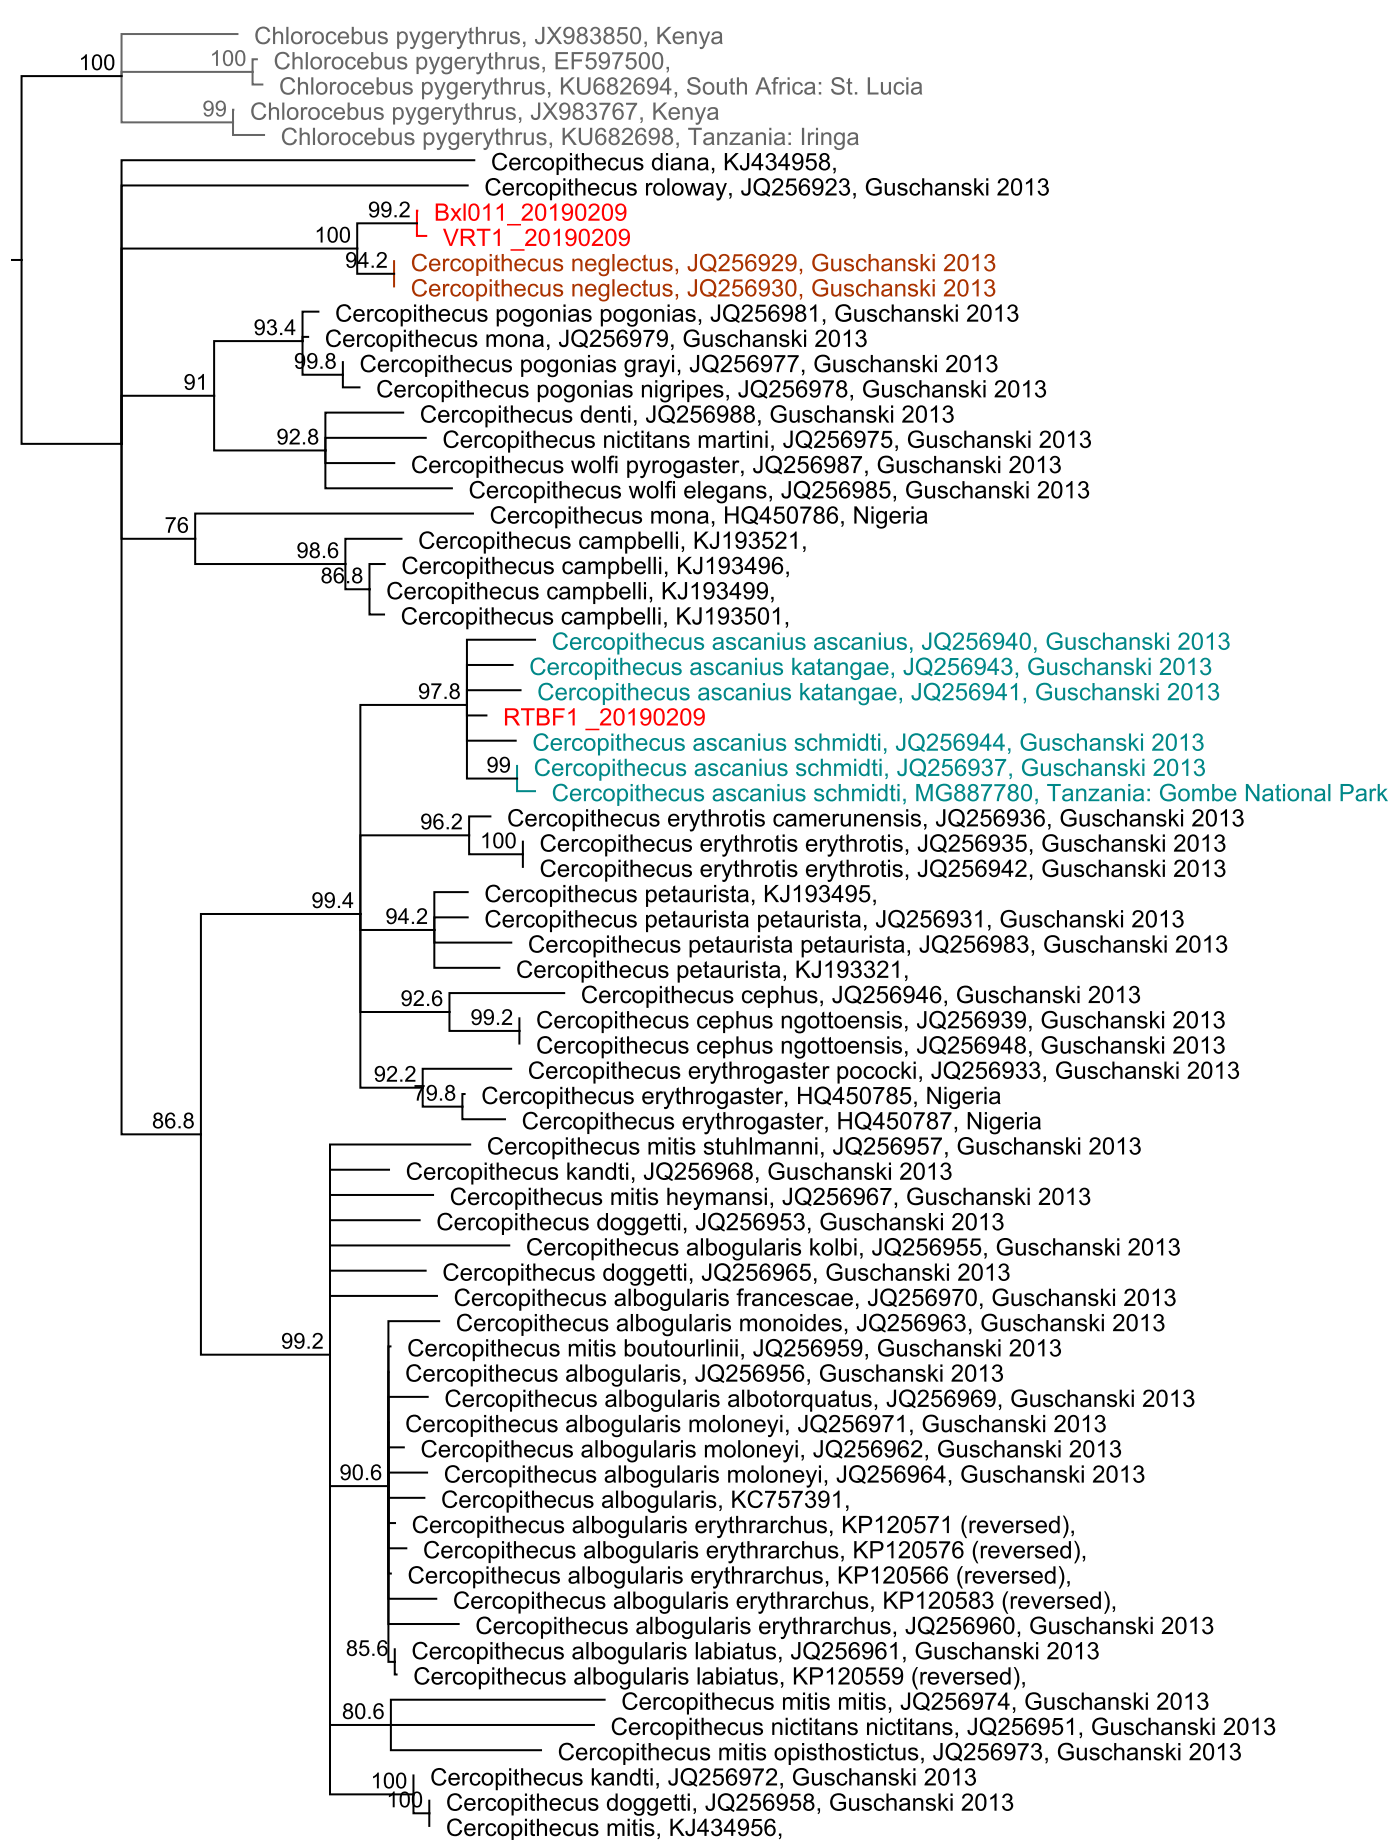

0.03

Figure S3 NJ-tree 32: cytb\_Cercopithecidae\_Cercopithecus\_trimmed

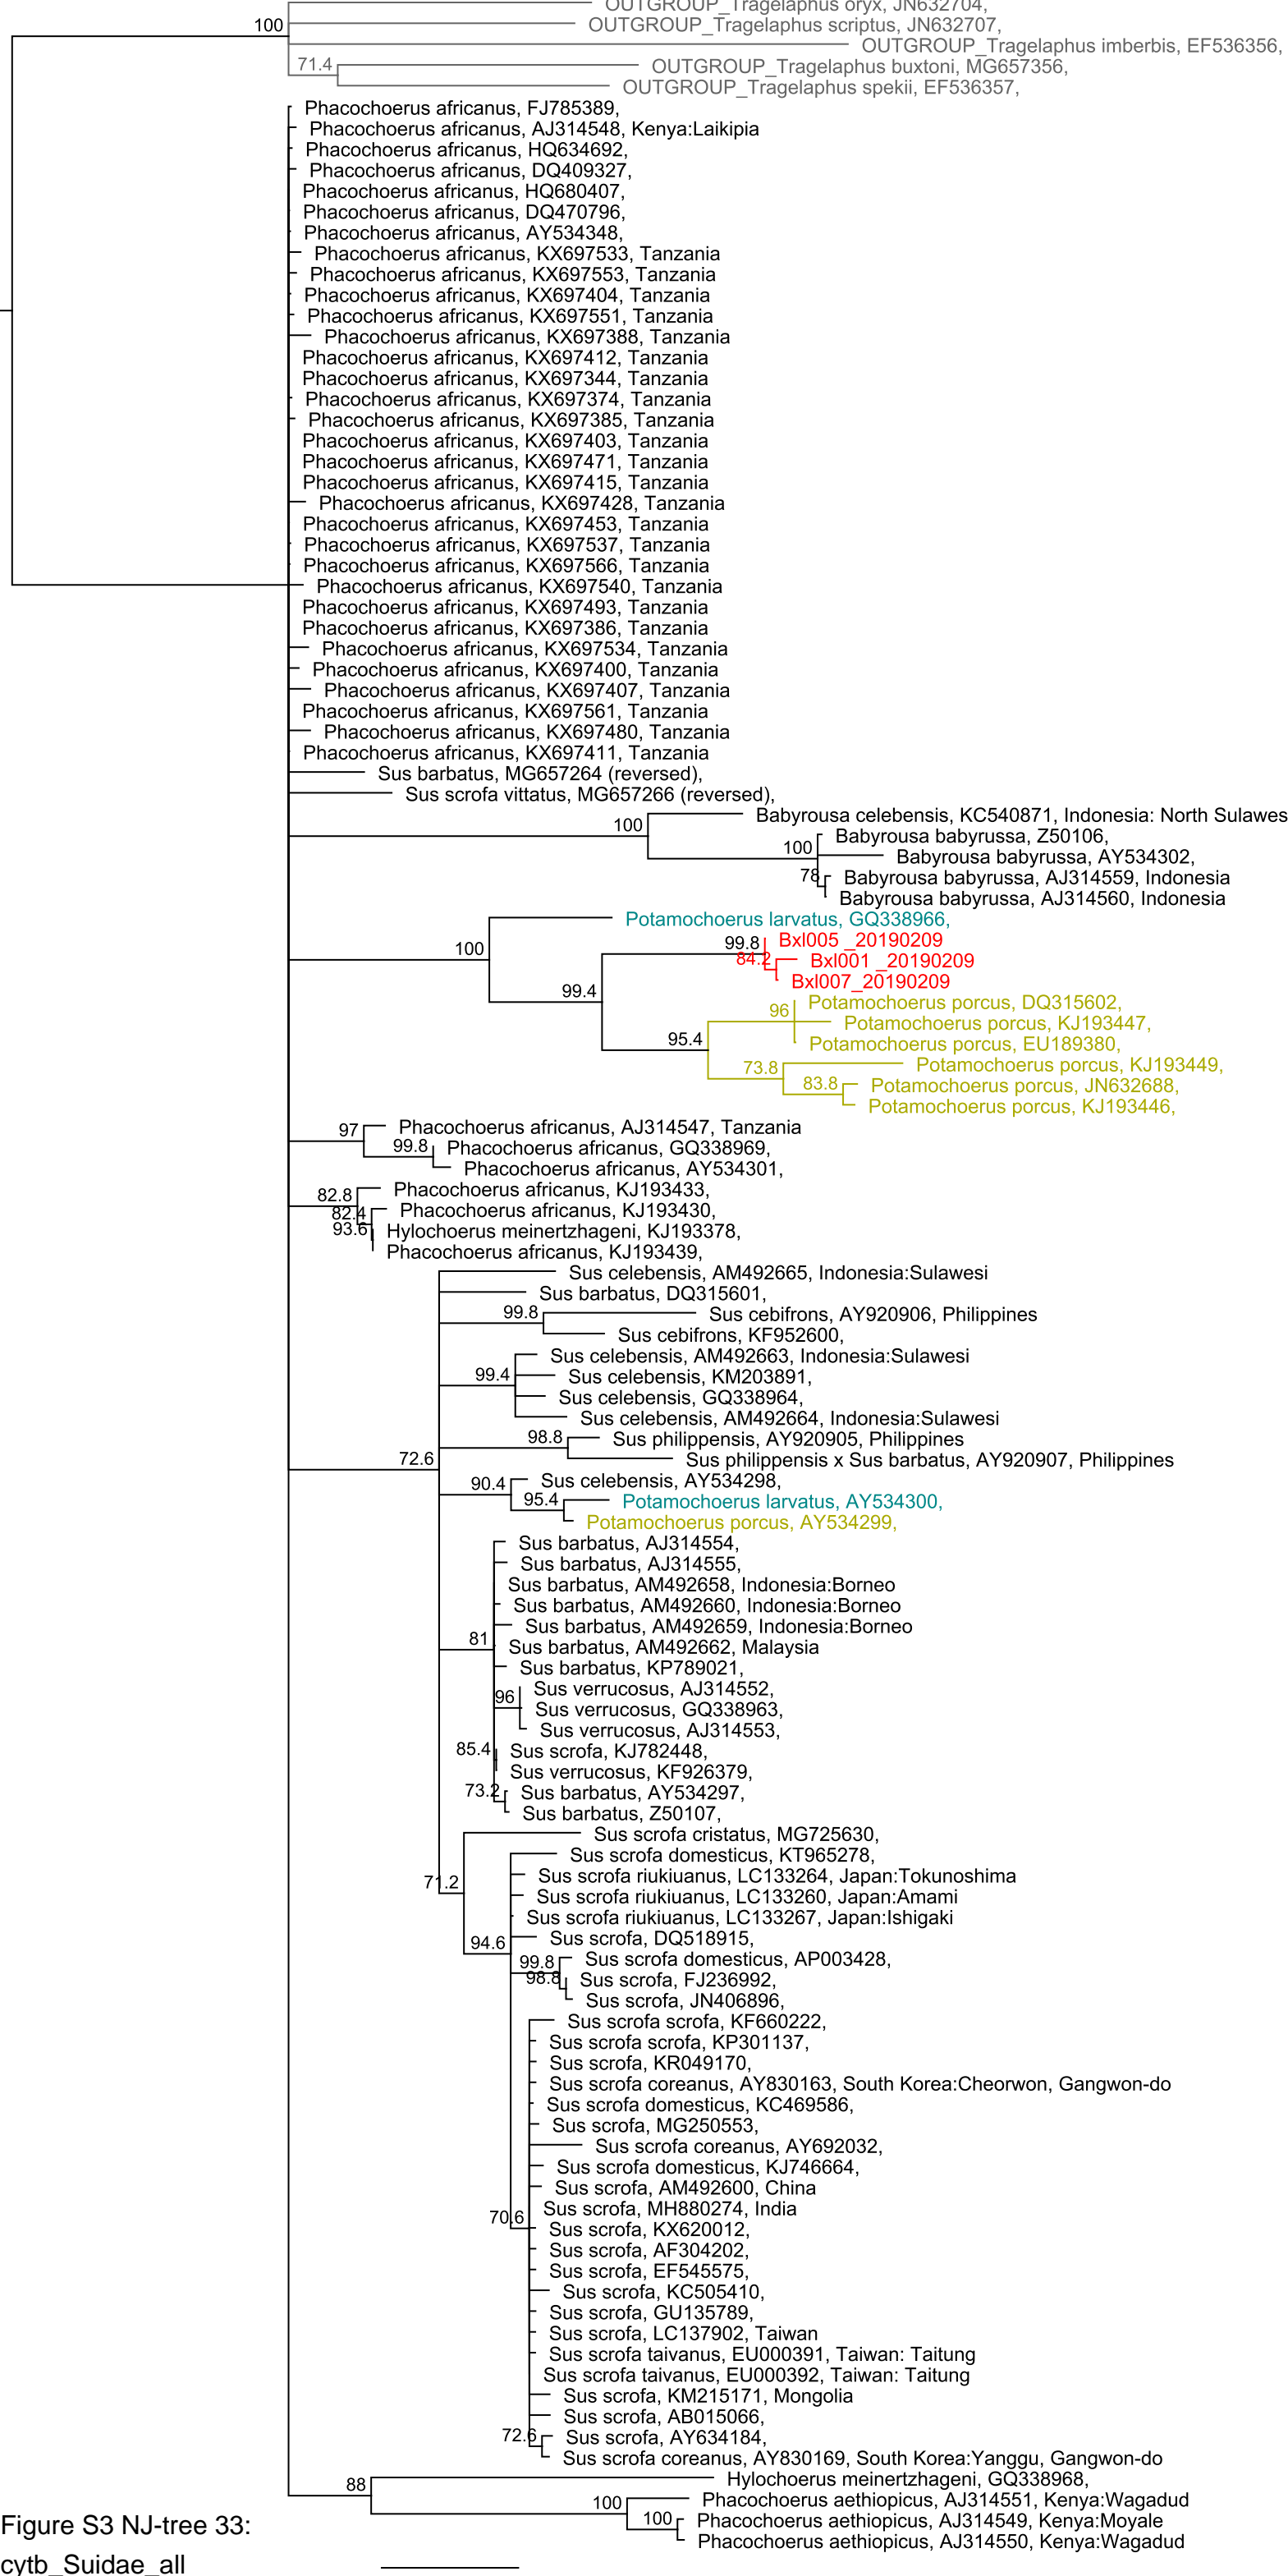

Figure S3 NJ-tree 33:  
cytb\_Suidae\_all

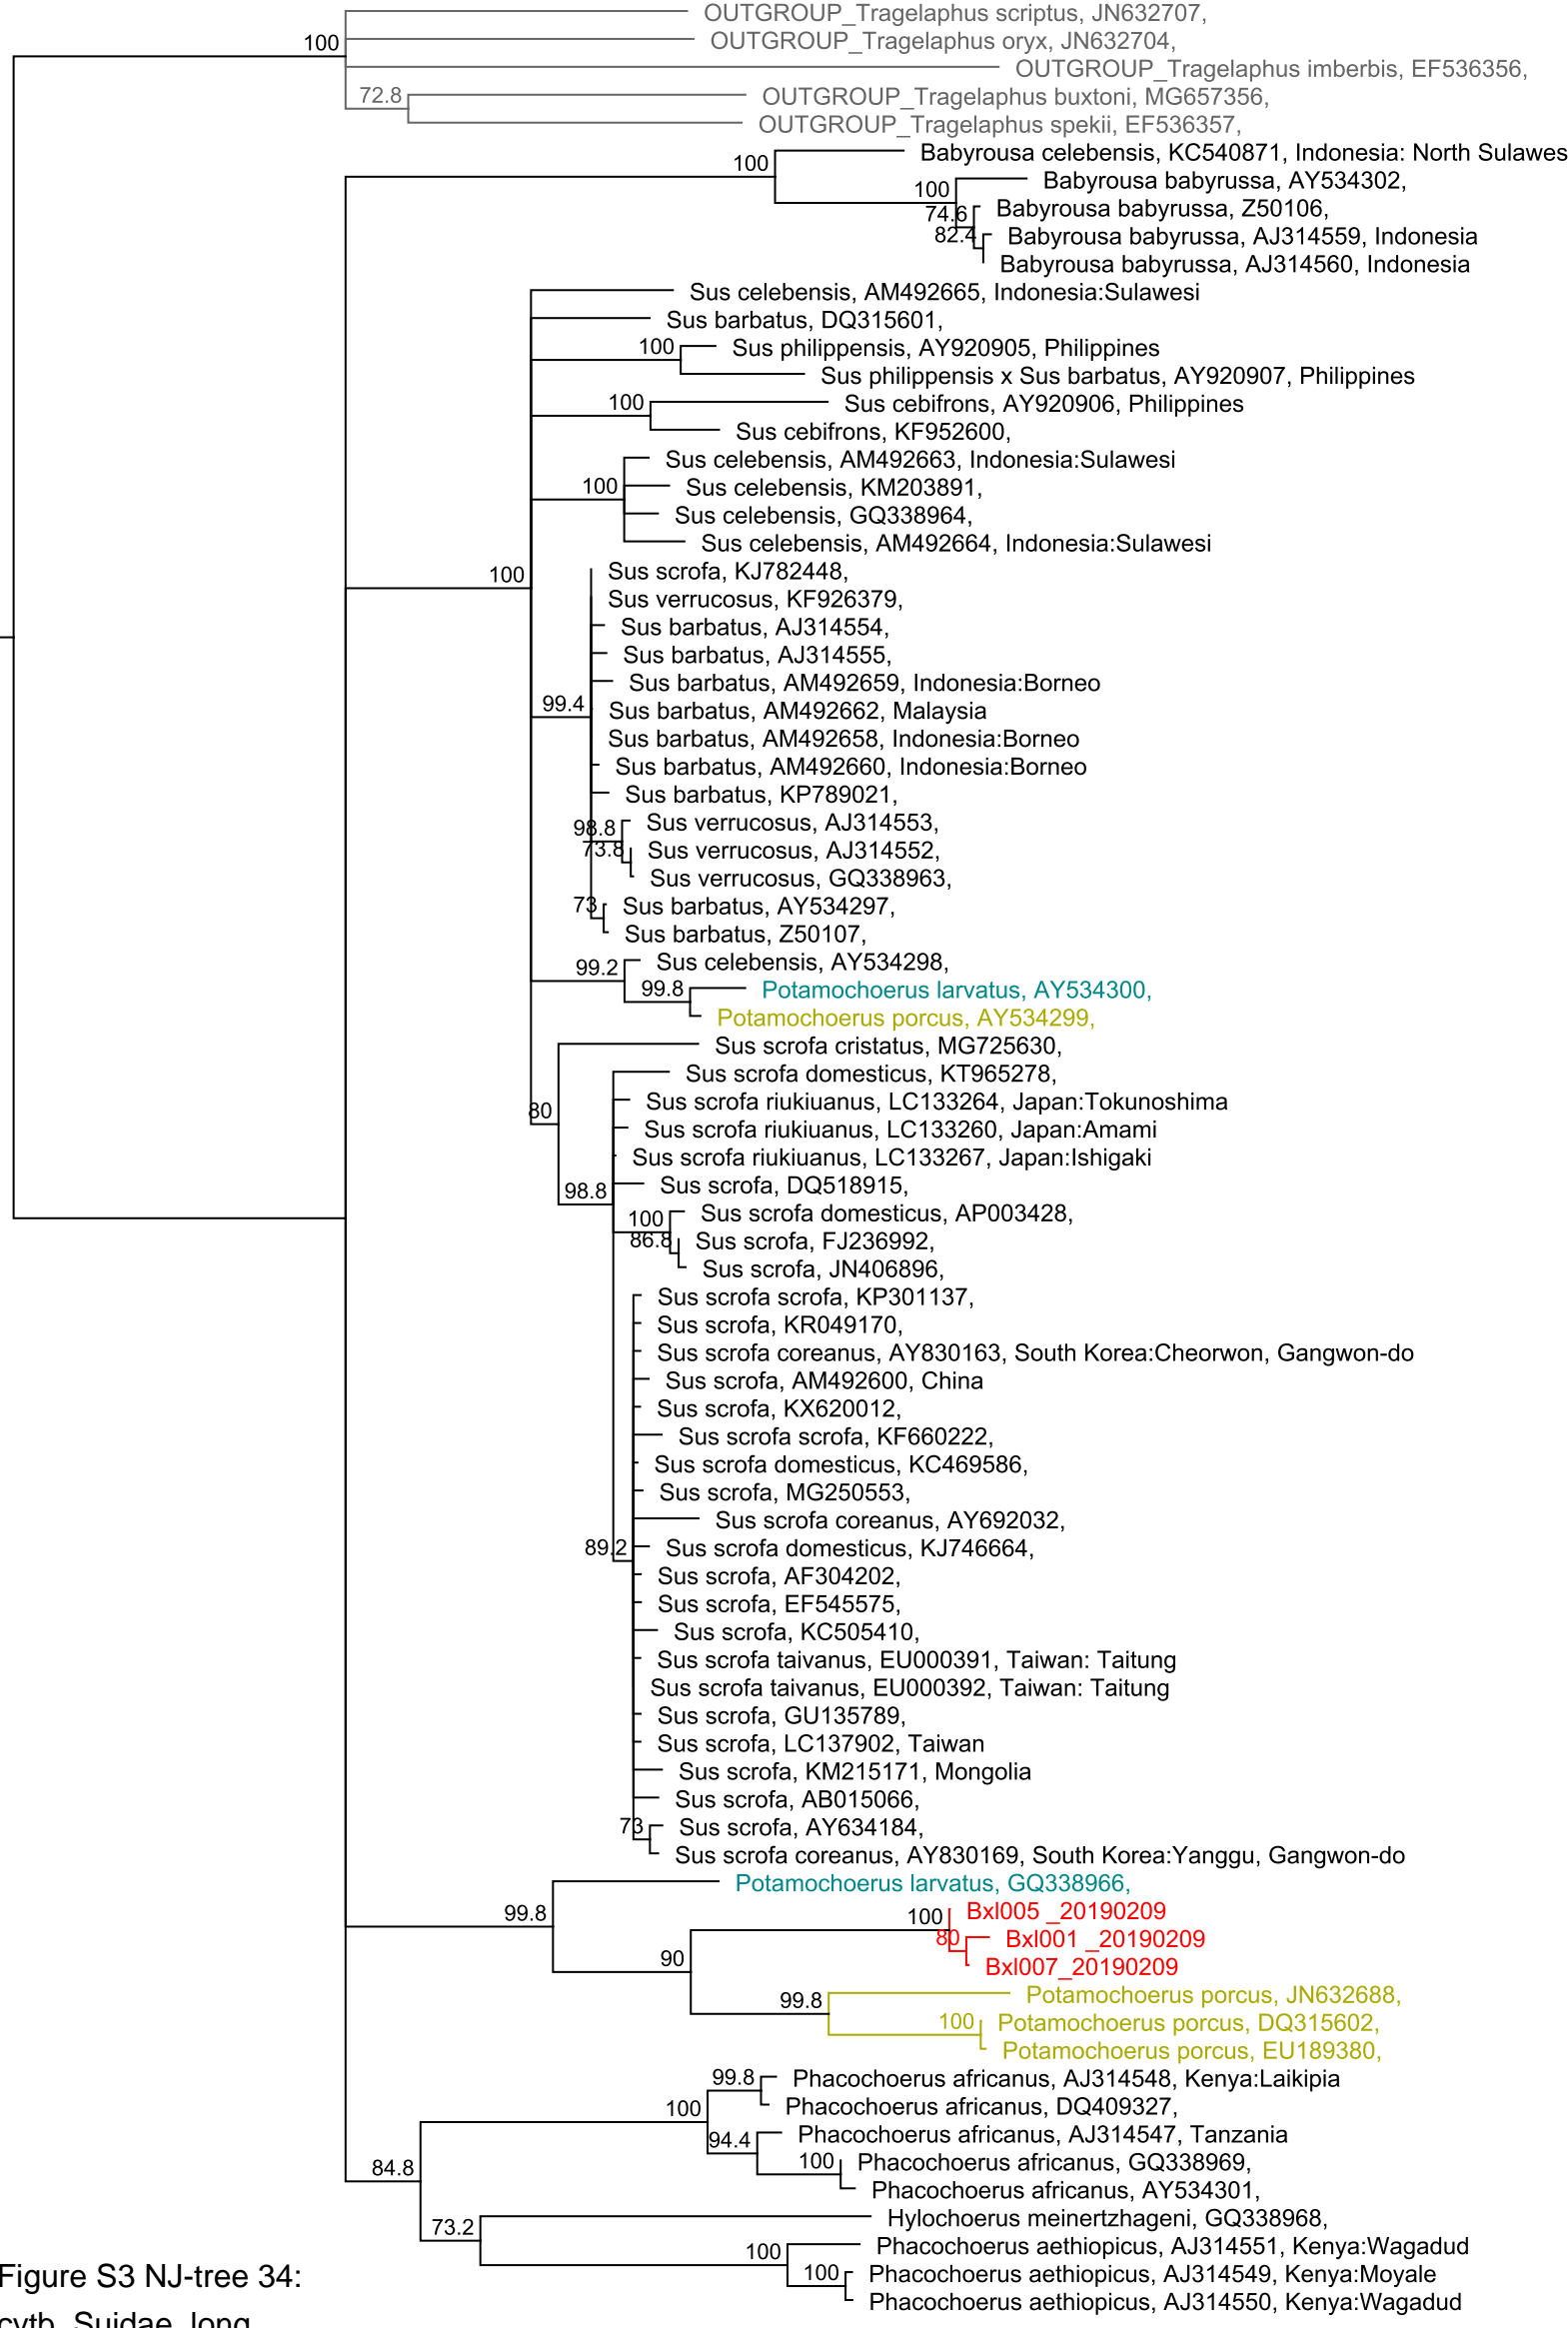

Figure S3 NJ-tree 34:  
cytb\_Suidae\_long

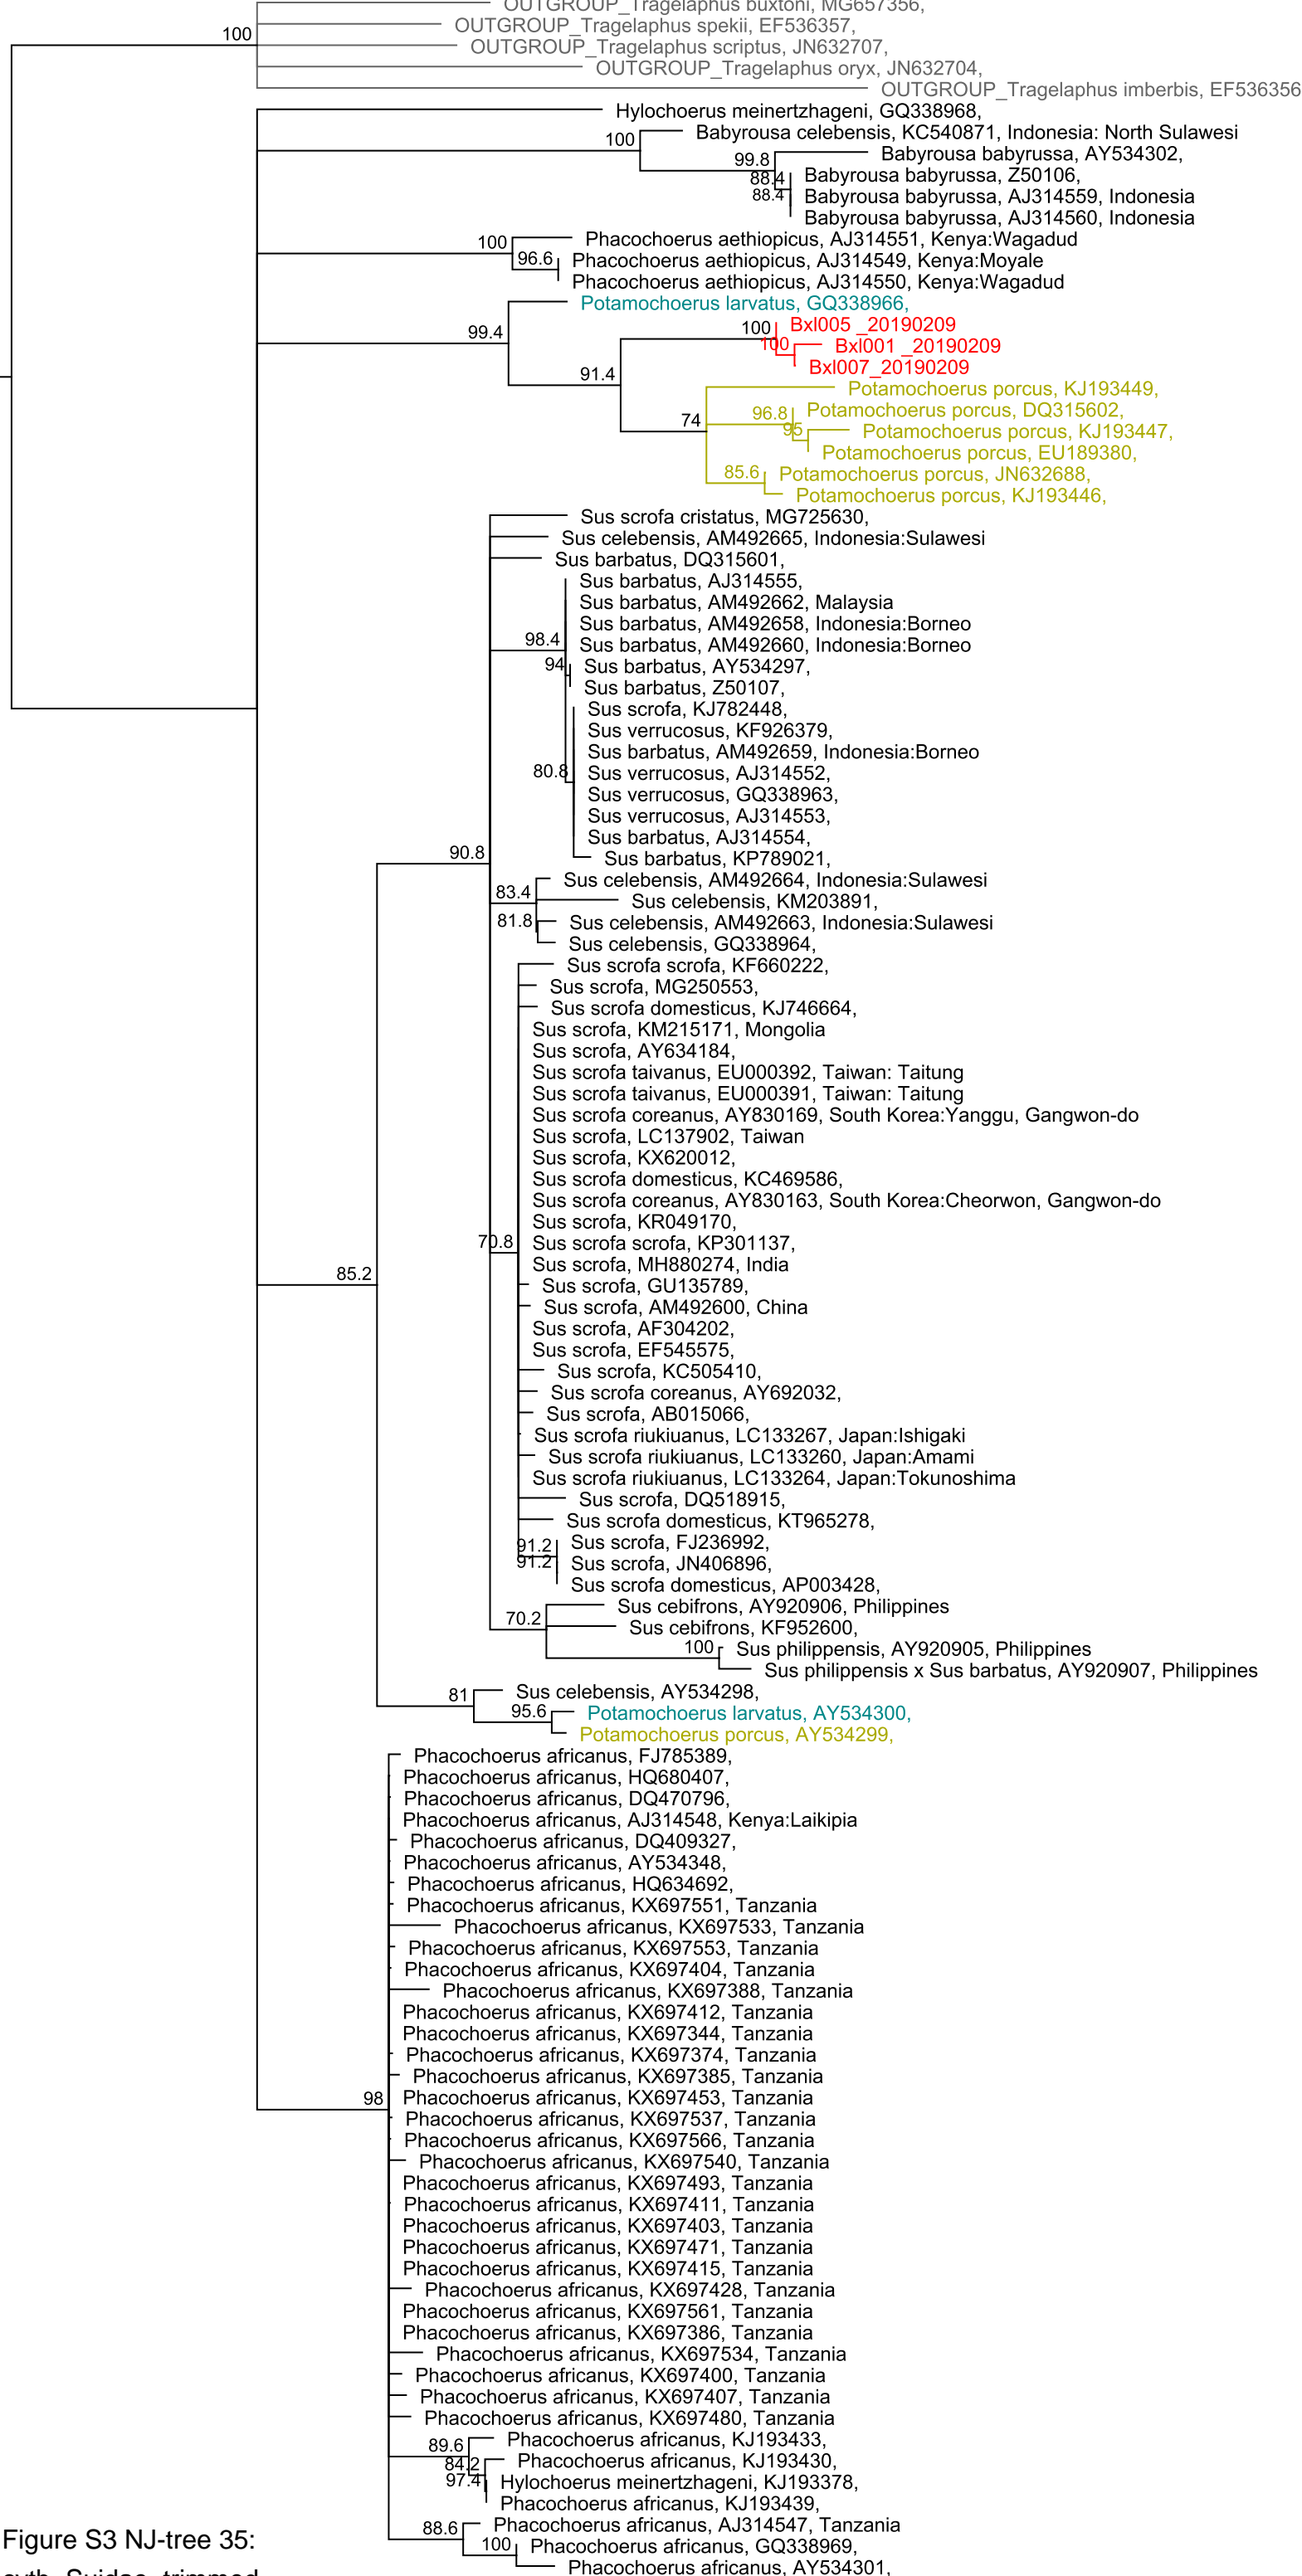

Figure S3 NJ-tree 35:  
cytb\_Suidae\_trimmed

0.02

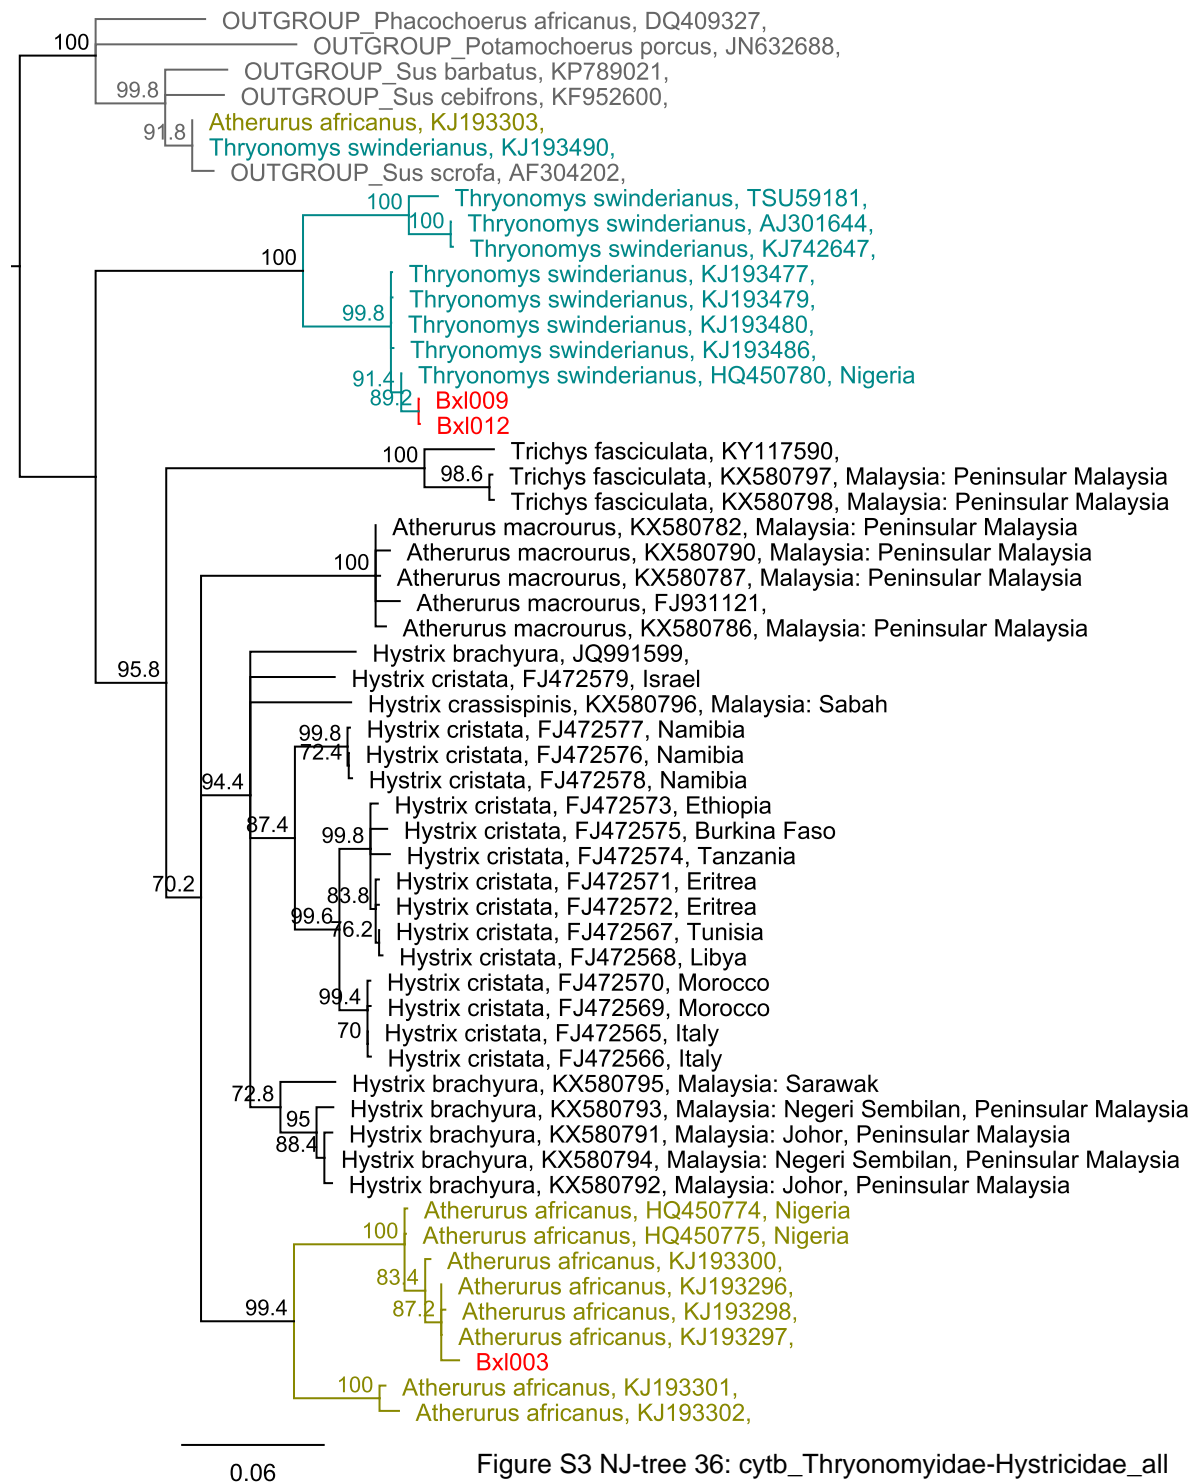

Figure S3 NJ-tree 36: cytb\_Thryonomyidae-Hystriidae\_all

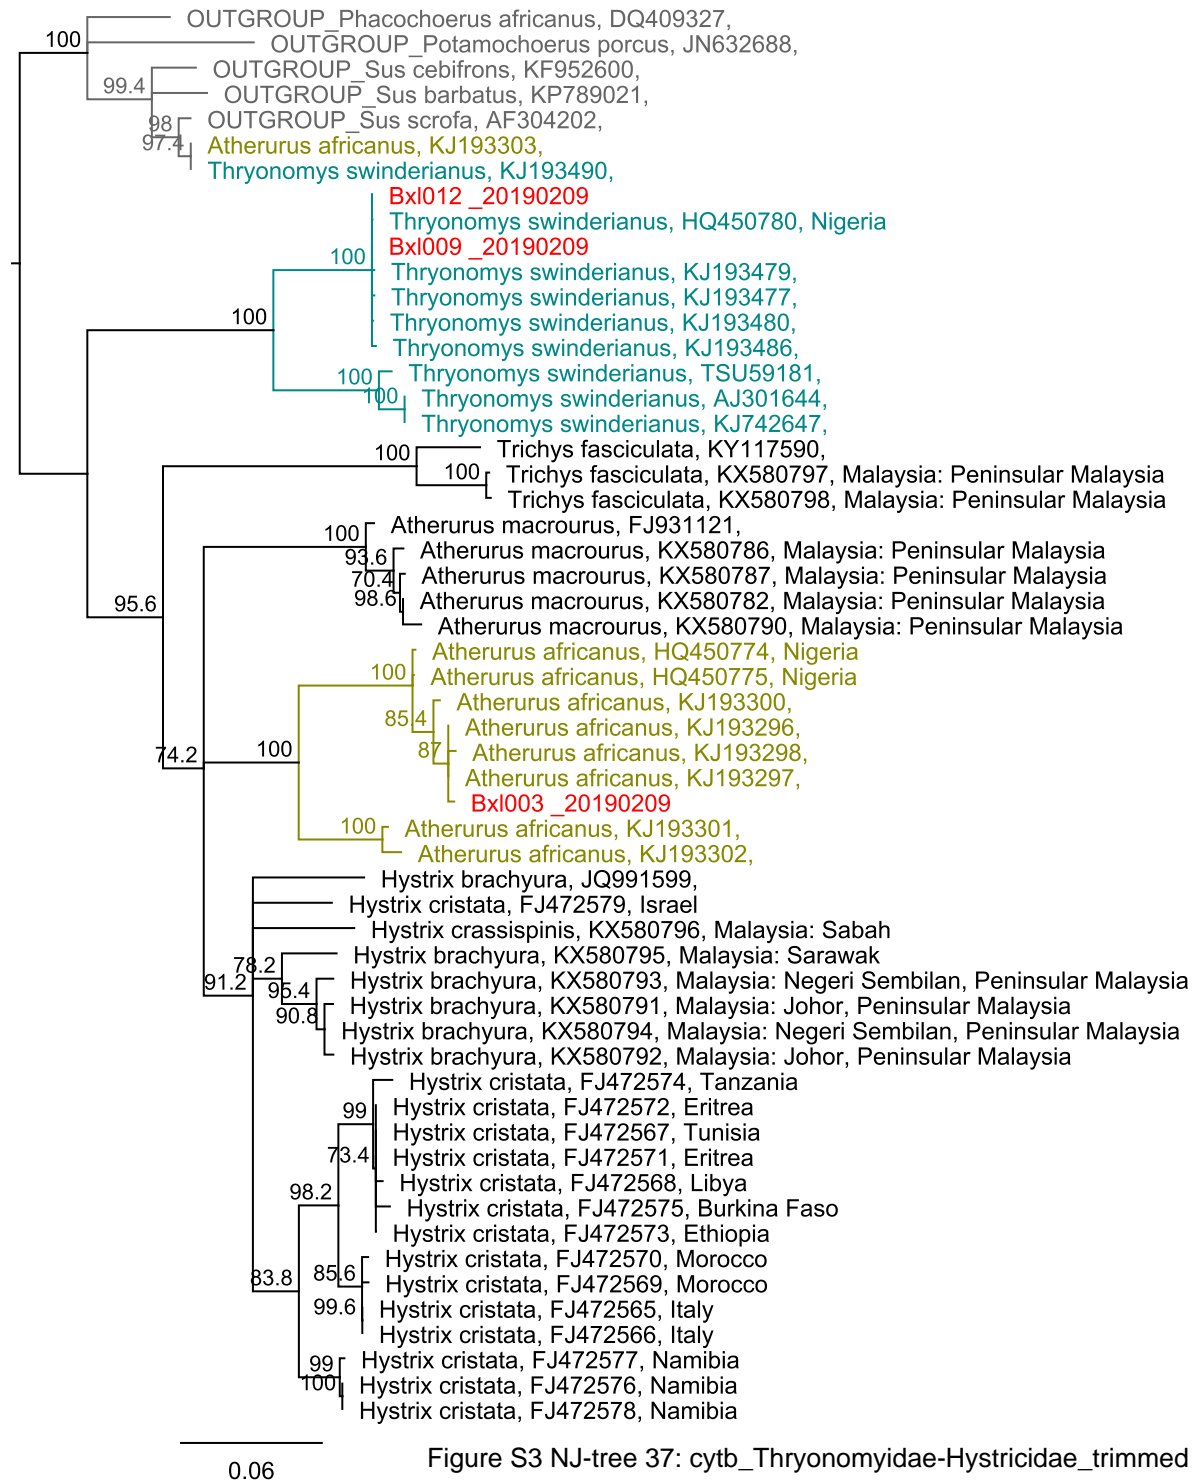

Supplement: MOESM3 [file 18574598]
